# Supplementary material
Source: PubMed Central journal article supplement (PMC3805035)
Supplement: NIHMS503504-supplement-Supporting_information_.pdf [file NIHMS503504-supplement-Supporting_information_.pdf]

## Supporting Information

### Diterpene Cyclases and the Nature of the Isoprene Fold

Rong Cao<sup>1</sup>, Yonghui Zhang<sup>2</sup>, Francis M. Mann<sup>3</sup>, Cancan Huang<sup>2</sup>, Dushyant Mukkamala<sup>1</sup>,  
Michael P. Hudock<sup>1</sup>, Matthew Mead<sup>3</sup>, Sladjana Prusic<sup>3</sup>, Ke Wang<sup>2</sup>, Fu-Yiang Lin<sup>1</sup>, Ting-Kai  
Chang<sup>2</sup>, Reuben Peters<sup>3,\*</sup>, and Eric Oldfield<sup>1,2,\*</sup>

<sup>1</sup>Center for Biophysics & Computational Biology,

University of Illinois at Urbana-Champaign, Urbana, IL 61801, USA;

<sup>2</sup>Department of Chemistry, University of Illinois at Urbana-Champaign, 600 South Mathews Avenue,

Urbana, IL 61801, USA; <sup>3</sup>Department of Biochemistry, Biophysics and Molecular Biology,

Iowa State University, Ames, IA 50011, USA

---

\*To whom correspondence may be addressed. E-mail: [rjpeters@iastate.edu](mailto:rjpeters@iastate.edu) or  
[eo@chad.scs.uiuc.edu](mailto:eo@chad.scs.uiuc.edu)

#### Table of Contents

|                                                                                            |         |
|--------------------------------------------------------------------------------------------|---------|
| Supporting Tables .....                                                                    | S3-S9   |
| The predicted and experimental numbers of helices and turns .....                          | S3      |
| QSAR table .....                                                                           | S4-S5   |
| Distance Matrix of 20 terpene synthases by SSM program.....                                | S6-S7   |
| Distance Matrix of 20 terpene synthases by CE program.....                                 | S8-S9   |
| Supporting Figures.....                                                                    | S10-S57 |
| Sequence alignment between bacterial diterpene cyclases and triterpene cyclases ...        | S10-S11 |
| Predicted and experimental number of helices and turns .....                               | S12     |
| Full alignment of 228 terpene synthases obtained by using the PSI-BLAST.....               | S13-S37 |
| Full Structures of <i>Abies grandis</i> abietadiene synthase inhibitors investigated ..... | S38     |

|                                                                                                                            |         |
|----------------------------------------------------------------------------------------------------------------------------|---------|
| Structure Dendrogram .....                                                                                                 | S39     |
| PSI-BLAST output using Blr2149 as query .....                                                                              | S40-S54 |
| FASTA search program output alignment by using <i>Bradyrhizobium japonicum</i> $\gamma$ -domain<br>only as the query ..... | S55     |
| Supporting Experimental Section .....                                                                                      | S56-S62 |
| Supporting references .....                                                                                                | S62-S63 |

Table S1: The number of helices ( $N_h$ ) and turns ( $N_t$ ) calculated using the COUDES<sup>1</sup> program versus the number determined experimentally for 10 terpene synthases. The numbers of helices and turns predicted for two bacterial diterpene cyclases (*B. japonicum* CPS, *M. tuberculosis* Rv3377c) and one plant diterpene cyclase (AgABS) are also shown.

|      |                                | $N_h$ (calc) | $N_t$ (cacl) | $N_h$ (expt) | $N_t$ (expt) |
|------|--------------------------------|--------------|--------------|--------------|--------------|
| 3sqc | SHC                            | 24           | 31           | 27           | 33           |
| 1w6k | OSC                            | 26           | 35           | 28           | 34           |
| 1kzo | Farnesyl transferase           | 31           | 29           | 31           | 28           |
| 3dra | Geranylgeranyl transferase I   | 28           | 20           | 30           | 21           |
| 3dss | Geranylgeranyl transferase II  | 27           | 19           | 26           | 22           |
| 2a73 | complement C3 $\beta$ subunit  | 12           | 7            | 13           | 9            |
| 2f8z | FPPS                           | 14           | 9            | 13           | 11           |
| 2q80 | GGPPS                          | 14           | 10           | 12           | 7            |
| 1ezf | SQS                            | 13           | 8            | 14           | 11           |
| 2zcg | <i>S. aureus</i> CrtM          | 11           | 5            | 12           | 6            |
|      | <i>B. japonicum</i> CPS        | 23           | 19           |              |              |
|      | <i>M. tuberculosis</i> Rv3377c | 19           | 26           |              |              |
|      | AgABS                          | 34           | 32           |              |              |

Table S2: CoMSIA training and test set predictions for AgABS Inhibition using GGPP as the substrate

| Compound <sup>a</sup> | Experimental          |                                    | Training | Test Set pIC <sub>50</sub> (M) <sup>b, c</sup> |            |            |            |            |            | Predicted | Residual |
|-----------------------|-----------------------|------------------------------------|----------|------------------------------------------------|------------|------------|------------|------------|------------|-----------|----------|
|                       | IC <sub>50</sub> (μM) | pIC <sub>50</sub> (M) <sup>b</sup> |          | 1                                              | 2          | 3          | 4          | 5          | 6          |           |          |
| Aza-GGPP              | 0.01                  | 7.9                                | 7.8      | <b>7.9</b>                                     | 8          | 7.9        | 7.9        | 7.9        | 7.9        | 7.9       | 0        |
| BPH-916               | 0.15                  | 6.8                                | 6.7      | 6.8                                            | 6.8        | <b>6.7</b> | 6.7        | 6.8        | 6.8        | 6.7       | 0.1      |
| BPH-882               | 0.19                  | 6.7                                | 6.7      | 6.7                                            | 6.7        | 6.8        | 6.7        | <b>5.6</b> | 6.7        | 5.6       | 1.1      |
| BPH-890               | 0.24                  | 6.6                                | 6.6      | 6.7                                            | 6.7        | 6.7        | 6.7        | <b>6</b>   | 6.6        | 6         | 0.6      |
| BPH-922               | 0.25                  | 6.6                                | 6.6      | 6.6                                            | <b>6.5</b> | 6.7        | 6.6        | 6.6        | 6.5        | 6.5       | 0.1      |
| BPH-901               | 0.29                  | 6.5                                | 6.5      | 6.5                                            | <b>6.2</b> | 6.5        | 6.6        | 6.7        | 6.5        | 6.2       | 0.3      |
| BPH-899               | 0.35                  | 6.5                                | 6.5      | 6.5                                            | 6.6        | 6.5        | <b>6.4</b> | 6.5        | 6.4        | 6.4       | 0.1      |
| BPH-921               | 0.48                  | 6.3                                | 6.2      | 6.1                                            | 6.1        | 6.1        | 6.1        | <b>5.9</b> | 6.2        | 5.9       | 0.4      |
| BPH-892               | 0.53                  | 6.3                                | 6.3      | <b>6.4</b>                                     | 6.2        | 6.3        | 6.3        | 6.3        | 6.3        | 6.4       | -0.1     |
| BPH-917               | 0.77                  | 6.1                                | 6.1      | 6.1                                            | 6.1        | <b>6</b>   | 6.2        | 6.1        | 6.1        | 6         | 0.1      |
| BPH-907               | 0.94                  | 6                                  | 6        | 6                                              | 6          | <b>5.9</b> | 6          | 6          | 6          | 5.9       | 0.1      |
| BPH-909               | 1.02                  | 6                                  | 6.1      | <b>6.3</b>                                     | 6          | 6.1        | 6          | 6          | 6.1        | 6.3       | -0.3     |
| BPH-908               | 1.08                  | 6                                  | 6        | 6                                              | 5.9        | 6          | 6          | 5.9        | <b>5.9</b> | 5.9       | 0.1      |
| BPH-924               | 1.18                  | 5.9                                | 6.2      | 6.1                                            | 6.1        | 6.2        | 6.1        | <b>5.9</b> | 6.2        | 5.9       | 0        |
| BPH-896               | 1.45                  | 5.8                                | 5.7      | 5.8                                            | 5.6        | 5.7        | 5.8        | 5.5        | <b>5.4</b> | 5.4       | 0.4      |
| BPH-863               | 1.72                  | 5.7                                | 5.7      | 5.8                                            | 5.6        | 5.7        | 5.7        | 5.8        | <b>5.5</b> | 5.5       | 0.2      |
| BPH-923               | 1.94                  | 5.7                                | 5.8      | <b>6.2</b>                                     | 5.7        | 5.7        | 5.7        | 5.7        | 5.7        | 6.2       | -0.5     |
| BPH-905               | 2.47                  | 5.6                                | 5.5      | 5.6                                            | 5.6        | 5.5        | <b>5.3</b> | 5.5        | 5.5        | 5.3       | 0.3      |
| BPH-902               | 3                     | 5.5                                | 5.6      | 5.5                                            | <b>5</b>   | 5.4        | 5.5        | 5.6        | 5.6        | 5         | 0.5      |
| BPH-661               | 10.68                 | 5                                  | 5        | 5                                              | 5          | 5          | <b>5.2</b> | 5.1        | 5          | 5.2       | -0.2     |
| BPH-904               | 12.58                 | 4.9                                | 4.9      | 4.9                                            | 4.9        | <b>4.9</b> | 4.9        | 4.9        | 4.9        | 4.9       | 0        |
| BPH-913               | 15                    | 4.8                                | 4.8      | 4.9                                            | <b>4.6</b> | 4.8        | 4.8        | 4.7        | 4.8        | 4.6       | 0.2      |
| BPH-918               | 30.34                 | 4.5                                | 4.5      | 4.5                                            | 4.4        | 4.5        | <b>5.3</b> | 4.5        | 4.5        | 5.3       | -0.8     |
| BPH-876               | 41.63                 | 4.4                                | 4.4      | 4.4                                            | 4.6        | 4.4        | 4.4        | 4.5        | <b>5</b>   | 5         | -0.6     |
| BPH-891               | 41.72                 | 4.4                                | 4.3      | 4.4                                            | 4.3        | <b>5.6</b> | 4.3        | 4.4        | 4.3        | 5.6       | -1.2     |
| BPH-883               | 67.7                  | 4.2                                | 4.2      | 4.1                                            | 4.2        | 4.2        | <b>5.6</b> | 4.2        | 4.2        | 5.6       | -1.4     |
| BPH-673               | 175.68                | 3.8                                | 3.7      | 3.7                                            | <b>5.2</b> | 3.8        | 3.7        | 3.8        | 3.7        | 5.2       | -1.4     |
| BPH-914               | 274                   | 3.6                                | 3.6      | <b>4.4</b>                                     | 3.6        | 3.6        | 3.5        | 3.6        | 3.6        | 4.4       | -0.8     |
|                       |                       | q <sup>2</sup>                     | 0.67     | 0.56                                           | 0.59       | 0.59       | 0.64       | 0.59       | 0.60       |           |          |

|                |      |      |      |      |      |      |      |
|----------------|------|------|------|------|------|------|------|
| r <sup>2</sup> | 0.99 | 0.99 | 0.99 | 0.99 | 0.99 | 0.99 | 0.99 |
| N              | 6    | 6    | 5    | 6    | 5    | 6    | 6    |
| F              | 734  | 474  | 503  | 503  | 602  | 603  | 916  |
| n              | 28   | 23   | 23   | 23   | 23   | 24   | 24   |
| %Steric        | 0.17 | 0.18 | 0.16 | 0.17 | 0.17 | 0.15 | 0.14 |
| %Electrostatic | 0.18 | 0.19 | 0.20 | 0.22 | 0.20 | 0.25 | 0.18 |
| %Donor         | 0.33 | 0.31 | 0.33 | 0.31 | 0.37 | 0.37 | 0.34 |
| %Acceptor      | 0.31 | 0.32 | 0.29 | 0.32 | 0.25 | 0.29 | 0.33 |

---

N = number of components; n = Number of training set compounds

<sup>a</sup> the structures of all inhibitors shown in Figure S4.

<sup>b</sup>  $pIC_{50} = -\log_{10}IC_{50}[M]$

<sup>c</sup> bold values indicated compounds not included in training set.

Table S3. Distance matrix for 20 terpene synthase structures obtained by using the Protein Structure Alignment by SSM program<sup>2</sup>. The values shown are the normalized C<sup>α</sup> rmsd values (1000\* (C<sup>α</sup> rmsd (Å)/N), where N is the number of aligned residues in structures *i* and *j*). The letters shown are the PDB file designations.<sup>a</sup>

|                   | 1JFG | 1DI1 | 5EAS | 1N1B | 2ONG | 1PS1 | 2F7M | 2HER | 2IHI | 1YHK | 2FOR | 1UBV | 2EWG | 1RQI | 1RTR | 2E8T | 2J1O | 2Q80 | 2ZCP | 1EZF |
|-------------------|------|------|------|------|------|------|------|------|------|------|------|------|------|------|------|------|------|------|------|------|
| 1JFG <sup>b</sup> | -    | 17.4 | 13.1 | 14.7 | 14.9 | 15.6 | 17.4 | 19.0 | 19.9 | 17.7 | 21.1 | 17.4 | 18.2 | 19.9 | 20.2 | 20.0 | 21.4 | 21.1 | 18   | 19.9 |
| 1DI1              | 17.4 | -    | 24.9 | 15.3 | 13.7 | 11.3 | 21.2 | 20.2 | 20.9 | 19.8 | 22.4 | 21.1 | 19.7 | 22.1 | 25.0 | 25.7 | 27.8 | 25.5 | 20.5 | 22.1 |
| 5EAS              | 13.1 | 24.9 | -    | 4.3  | 4.0  | 12.0 | 15.6 | 16.2 | 16.6 | 15.1 | 19.7 | 15.0 | 15.5 | 17.8 | 19.9 | 14.5 | 19.9 | 14.5 | 17.2 | 16.9 |
| 1N1B              | 14.7 | 15.3 | 4.3  | -    | 2.5  | 11.9 | 15.5 | 16.7 | 16.6 | 16.0 | 20.9 | 16.5 | 16.2 | 20.8 | 20.3 | 15.5 | 20.0 | 16.2 | 18.6 | 18.2 |
| 2ONG              | 14.9 | 13.7 | 4.0  | 2.5  | -    | 11.2 | 14.8 | 16.4 | 14.9 | 14.9 | 19.9 | 15.6 | 18.7 | 17.8 | 20.2 | 15.1 | 20.7 | 15.6 | 17   | 17.3 |
| 1PS1              | 15.6 | 11.3 | 12.0 | 11.9 | 11.2 | -    | 16.9 | 17.5 | 18.3 | 16.5 | 22.5 | 17.1 | 16.2 | 21.3 | 21.8 | 17.5 | 23.0 | 16.7 | 17.6 | 18.1 |
| 2F7M              | 17.4 | 21.2 | 15.6 | 15.5 | 14.8 | 16.9 | -    | 7.0  | 5.1  | 5.9  | 10.8 | 2.7  | 5.8  | 10.8 | 10.5 | 9.5  | 12.1 | 10.3 | 19.1 | 18   |
| 2HER              | 19.0 | 20.2 | 16.2 | 16.7 | 16.4 | 17.5 | 7.0  | -    | 5.1  | 5.7  | 11.8 | 7.5  | 5.4  | 11.1 | 11.9 | 10.3 | 13.9 | 10.0 | 20.1 | 17.2 |
| 2IHI              | 19.9 | 20.9 | 16.6 | 16.6 | 14.9 | 18.3 | 5.1  | 5.1  | -    | 4.0  | 10.4 | 5.7  | 4.7  | 9.1  | 10.7 | 10.0 | 12.3 | 9.6  | 19.7 | 18.2 |
| 1YHK              | 17.7 | 19.8 | 15.1 | 16.0 | 14.9 | 16.5 | 5.9  | 5.7  | 4.0  | -    | 10.4 | 5.8  | 2.7  | 9.6  | 10.9 | 10.2 | 12.4 | 10.1 | 19.6 | 17.4 |
| 2FOR              | 21.1 | 22.4 | 19.7 | 20.9 | 19.9 | 22.5 | 10.8 | 11.8 | 10.4 | 10.4 | -    | 11.1 | 10.3 | 3.8  | 4.8  | 18.5 | 5.8  | 10.8 | 19.6 | 18.7 |
| 1UBV              | 17.4 | 21.1 | 15.0 | 16.5 | 15.6 | 17.1 | 2.7  | 7.5  | 5.7  | 5.8  | 11.1 | -    | 6.0  | 11.0 | 10.5 | 9.1  | 12.3 | 10.5 | 19.9 | 18.8 |
| 2EWG              | 18.2 | 19.7 | 15.5 | 16.2 | 18.7 | 16.2 | 5.8  | 5.4  | 4.7  | 2.7  | 10.3 | 6.0  | -    | 8.3  | 11.3 | 9.3  | 12.7 | 8.9  | 19   | 16.3 |
| 1RQI              | 19.9 | 22.1 | 17.8 | 20.8 | 17.8 | 21.3 | 10.8 | 11.1 | 9.1  | 9.6  | 3.8  | 11.0 | 8.3  | -    | 6.2  | 9.7  | 7.4  | 8.8  | 18.6 | 17.5 |
| 1RTR              | 20.2 | 25.0 | 19.9 | 20.3 | 20.2 | 21.8 | 10.5 | 11.9 | 10.7 | 10.9 | 4.8  | 10.5 | 11.3 | 6.2  | -    | 11.8 | 6.3  | 11.4 | 18.1 | 19   |
| 2E8T              | 20.0 | 25.7 | 14.5 | 15.5 | 15.1 | 17.5 | 9.5  | 10.3 | 10.0 | 10.2 | 18.5 | 9.1  | 9.3  | 9.7  | 11.8 | -    | 19.2 | 4.8  | 20.3 | 18.6 |
| 2J1O              | 21.4 | 27.8 | 19.9 | 20.0 | 20.7 | 23.0 | 12.1 | 13.9 | 12.3 | 12.4 | 5.8  | 12.3 | 12.7 | 7.4  | 6.3  | 19.2 | -    | 16.4 | 21.3 | 23   |
| 2Q80              | 21.1 | 25.5 | 14.5 | 16.2 | 15.6 | 16.7 | 10.3 | 10.0 | 9.6  | 10.1 | 10.8 | 10.5 | 8.9  | 8.8  | 11.4 | 4.8  | 16.4 | -    | 17.8 | 15.7 |
| 2ZCP              | 18   | 20.5 | 17.2 | 18.6 | 17   | 17.6 | 19.1 | 20.1 | 19.7 | 19.6 | 19.6 | 19.9 | 19   | 18.6 | 18.1 | 20.3 | 21.3 | 17.8 | -    | 10.8 |
| 1EZF              | 19.9 | 22.1 | 16.9 | 18.2 | 17.3 | 18.1 | 18   | 17.2 | 18.2 | 17.4 | 18.7 | 18.8 | 16.3 | 17.5 | 19   | 18.6 | 23   | 15.7 | 10.8 | -    |

<sup>a</sup>These normalized C<sup>α</sup> rmsd values were used to construct the phylogenetic tree shown in Fig 6a.

<sup>b</sup>1JFG: *Fusarium sporotrichioides* trichodiene synthase  
1DI1: *Penicillium roqueforti* aristolochene synthase  
5EAS: *Nicotiana tabacum* 5-epi-aristolochene synthase  
1N1B: *Salvia officinalis* (+)-bornyl diphosphate Synthase  
2ONG: *Mentha spicata* 4S-limonene synthase  
1PS1: *Streptomyces sp.* pentalenene synthase  
2F7M: *Homo sapiens* farnesyl diphosphate synthase (FPPS)  
2HER: *Cryptosporidium parvum* FPPS  
2IHI: *Plasmodium vivax* FPPS  
1YHK: *Trypanosoma cruzi* FPPS  
2FOR: *Shigella flexneri* FPPS  
1UBV: *Gallus gallus* FPPS  
2EWG: *Trypanosoma brucei* FPPS  
1RQI: *Escherichia coli* FPPS  
1RTR: *Staphylococcus aureus* FPPS  
2E8T: *Saccharomyces cerevisiae* geranylgeranyl  
diphosphate synthase (GGPPS)  
2J1O: *Sinapis alba* GGPPS  
2Q80: *Homo sapiens* GGPPS  
2ZCP: *S. aureus* dehydrosqualene synthase (crtM)  
1EZF: *Homo sapiens* squalene synthase

Table S4: Distance matrix for 20 terpene synthase structures obtained by using the Protein Structure Alignment by Incremental Combinatorial Extension (CE) program<sup>3</sup>. The values shown are the normalized C<sup>α</sup> rmsd values (1000\* (C<sup>α</sup> rmsd (Å)/N), where N is the number of aligned residues in structures *i* and *j*). The letters shown are the PDB file designations.<sup>a</sup>

|                   | 1JFG | 1DI1 | 5EAS | 1N1B | 2ONG | 1PS1 | 2F7M | 2HER | 2IHI | 1YHK | 2FOR | 1UBV | 2EWG | 1RQI | 1RTR | 2E8T | 2J1O | 2Q80 | 1EZF | 2ZCP |
|-------------------|------|------|------|------|------|------|------|------|------|------|------|------|------|------|------|------|------|------|------|------|
| 1JFG <sup>b</sup> | -    | 20.0 | 13.8 | 14.8 | 15.4 | 13.1 | 16.9 | 16.0 | 33.1 | 15.9 | 17.4 | 16.8 | 16.5 | 20.8 | 16.6 | 18.7 | 18.4 | 23.4 | 20.4 | 19.7 |
| 1DI1              | 20.0 | -    | 13.8 | 15.7 | 14.3 | 10.3 | 18.3 | 16.6 | 32.8 | 20.6 | 35.0 | 22.6 | 22.7 | 18.8 | 23.2 | 20.7 | 23.5 | 22.5 | 20.4 | 17.9 |
| 5EAS              | 13.8 | 13.8 | -    | 4.2  | 4.0  | 13.4 | 14.5 | 18.6 | 14.2 | 13.8 | 16.8 | 13.9 | 14.8 | 16.5 | 15.7 | 16.7 | 18.1 | 17.3 | 16.4 | 15.1 |
| 1N1B              | 14.8 | 15.7 | 4.2  | -    | 2.6  | 15.4 | 14.5 | 20.0 | 17.0 | 16.7 | 20.0 | 16.6 | 16.7 | 19.3 | 20.4 | 16.0 | 19.4 | 17.0 | 17.3 | 17.4 |
| 2ONG              | 15.4 | 14.3 | 4.0  | 2.6  | -    | 14.2 | 16.3 | 19.5 | 18.0 | 16.0 | 19.5 | 15.9 | 16.0 | 18.6 | 17.8 | 16.8 | 23.1 | 18.0 | 17.1 | 16.9 |
| 1PS1              | 13.1 | 10.3 | 13.4 | 15.4 | 14.2 | -    | 18.8 | 17.3 | 19.0 | 16.8 | 22.4 | 18.2 | 16.9 | 20.8 | 20.1 | 21.5 | 22.7 | 18.2 | 17.4 | 17.1 |
| 2F7M              | 16.9 | 18.3 | 14.5 | 14.5 | 16.3 | 18.8 | -    | 6.3  | 4.5  | 5.0  | 9.9  | 5.1  | 5.3  | 9.0  | 9.7  | 9.3  | 11.5 | 9.0  | 16.9 | 17.8 |
| 2HER              | 16.0 | 16.6 | 18.6 | 20.0 | 19.5 | 17.3 | 6.3  | -    | 5.9  | 6.0  | 9.9  | 8.9  | 5.9  | 9.2  | 9.8  | 9.7  | 11.1 | 8.8  | 17.6 | 19.2 |
| 2IHI              | 33.1 | 32.8 | 14.2 | 17.0 | 18.0 | 19.0 | 4.5  | 5.9  | -    | 4.9  | 8.9  | 5.8  | 4.7  | 8.5  | 8.7  | 8.8  | 10.5 | 9.3  | 17   | 17.6 |
| 1YHK              | 15.9 | 20.6 | 13.8 | 16.7 | 16.0 | 16.8 | 5.0  | 6.0  | 4.9  | -    | 9.2  | 6.4  | 2.5  | 7.6  | 9.8  | 9.1  | 10.9 | 8.9  | 17.1 | 18.3 |
| 2FOR              | 17.4 | 35.0 | 16.8 | 20.0 | 19.5 | 22.4 | 9.9  | 9.9  | 8.9  | 9.2  | -    | 9.8  | 9.2  | 3.4  | 5.6  | 10.4 | 9.3  | 9.7  | 21.1 | 19.6 |
| 1UBV              | 16.8 | 22.6 | 13.9 | 16.6 | 15.9 | 18.2 | 5.1  | 8.9  | 5.8  | 6.4  | 9.8  | -    | 6.4  | 9.8  | 8.7  | 9.5  | 10.6 | 9.8  | 17.1 | 17.8 |
| 2EWG              | 16.5 | 22.7 | 14.8 | 16.7 | 16.0 | 16.9 | 5.3  | 5.9  | 4.7  | 2.5  | 9.2  | 6.4  | -    | 7.9  | 9.2  | 9.1  | 10.9 | 8.5  | 19.3 | 19.2 |
| 1RQI              | 20.8 | 18.8 | 16.5 | 19.3 | 18.6 | 20.8 | 9.0  | 9.2  | 8.5  | 7.6  | 3.4  | 9.8  | 7.9  | -    | 6.7  | 10.7 | 12.9 | 8.5  | 21.2 | 20.6 |
| 1RTR              | 16.6 | 23.2 | 15.7 | 20.4 | 17.8 | 20.1 | 9.7  | 9.8  | 8.7  | 9.8  | 5.6  | 8.7  | 9.2  | 6.7  | -    | 10.9 | 9.6  | 10.4 | 20.3 | 20   |
| 2E8T              | 18.7 | 20.7 | 16.7 | 16.0 | 16.8 | 21.5 | 9.3  | 9.7  | 8.8  | 9.1  | 10.4 | 9.5  | 9.1  | 10.7 | 10.9 | -    | 12.7 | 4.5  | 19.6 | 21.8 |
| 2J1O              | 18.4 | 23.5 | 18.1 | 19.4 | 23.1 | 22.7 | 11.5 | 11.1 | 10.5 | 10.9 | 9.3  | 10.6 | 10.9 | 12.9 | 9.6  | 12.7 | -    | 16.5 | 23.8 | 21   |
| 2Q80              | 23.4 | 22.5 | 17.3 | 17.0 | 18.0 | 18.2 | 9.0  | 8.8  | 9.3  | 8.9  | 9.7  | 9.8  | 8.5  | 8.5  | 10.4 | 4.5  | 16.5 | -    | 16.5 | 17.8 |
| 1EZF              | 20.4 | 20.4 | 16.4 | 17.3 | 17.1 | 17.4 | 16.9 | 17.6 | 17   | 17.1 | 21.1 | 17.1 | 19.3 | 21.2 | 20.3 | 19.6 | 23.8 | 16.5 | -    | 11.4 |
| 2ZCP              | 19.7 | 17.9 | 15.1 | 17.4 | 16.9 | 17.1 | 17.8 | 19.2 | 17.6 | 18.3 | 19.6 | 17.8 | 19.2 | 20.6 | 20   | 21.8 | 21   | 17.8 | 11.4 | -    |



<sup>a</sup>These normalized C<sup>α</sup> rmsd values were used to construct the phylogenetic tree shown in Fig S5.

<sup>b</sup>1JFG: *Fusarium sporotrichioides* trichodiene synthase  
1DI1: *Penicillium roqueforti* aristolochene synthase  
5EAS: *Nicotiana tabacum* 5-epi-aristolochene synthase  
1N1B: *Salvia officinalis* (+)-bornyl diphosphate Synthase  
2ONG: *Mentha spicata* 4S-limonene synthase  
1PS1: *Streptomyces sp.* pentalenene synthase  
2F7M: *Homo sapiens* farnesyl diphosphate synthase (FPPS)  
2HER: *Cryptosporidium parvum* FPPS  
2IHI: *Plasmodium vivax* FPPS  
1YHK: *Trypanosoma cruzi* FPPS  
2FOR: *Shigella flexneri* FPPS  
1UBV: *Gallus gallus* FPPS  
2EWG: *Trypanosoma brucei* FPPS  
1RQI: *Escherichia coli* FPPS  
1RTR: *Staphylococcus aureus* FPPS  
2E8T: *Saccharomyces cerevisiae* geranylgeranyl  
diphosphate synthase (GGPPS)  
2J1O: *Sinapis alba* GGPPS  
2Q80: *Homo sapiens* GGPPS  
2ZCP: *S. aureus* dehydrosqualene synthase (crtM)  
1EZF: *Homo sapiens* squalene synthase



*B.japonicum* CPS 232 -----GIEGVFPNVWPINVFEPWSLYTLHLGLFAHPALAEAVRVI<sup>VAQLDA</sup>  
*X.oryzae* cyclase 233 -----GIEGIVPNVWPINVFEPAWSLYTLHLGLFAHPALAEAVRATVAPLAA  
*B.multivorans* cyclase 242 -----AVPGVFPYVWPLDVFECAVYL<sup>YSLGGLGGLAAHPALTEPIARTATFLGA</sup>  
*S.cellulosum* cyclase 239 -----GIPGVVPTVWPIGRFEQAVVLYALRAF<sup>DLDDHPRLGDVARPQLDLDLGA</sup>  
*M.tuberculosis* cyclase 231 -----GAP-----AFYQAEIFEIVWSLWNLSRTD<sup>IDLSDPEIVR<sup>TY</sup>LPYLDHVE</sup>  
*S.clavuligerus* cyclase 231 -----RYGGLFPETARITVFERLWLVLTLLHRA<sup>GLLAT--FEPLARRWVSALAA</sup>  
*K.griseola* cyclase 226 -----RYGGAI<sup>PMGSSMPYFEVLWVLN----</sup>-LVLKYFPDVP<sup>IPREIEEIAA</sup>  
*A.acidocaldarius* SHC 286 GWEGLELYGVLDYGGW<sup>MFQASISPVWDTGLAVLALRAAGLPA</sup>DDHRLVKAGEW<sup>LDDRQI</sup>  
Human OSC 361 HVSRI<sup>PDYLWMLDGMKMQGTNGSQIWDTAFAIQALLEAGGHRP</sup>EFSSCKQKAHEFLRL  
Consensus 361 -----g-gvvp--w-i-vfe-aw-ly-l--agl-a-p-----r--v--laa

*B.japonicum* CPS 280 RL<sup>G</sup>-----VHGLGP-----ALHFAAD<sup>ADDDTAVALCVLHLA</sup>GRDPAVDALRH  
*X.oryzae* cyclase 281 RMS-----ARGLGP-----ALHFAAD<sup>ADDDTAVVLSVHLA</sup>GRAPTADALRQ  
*B.multivorans* cyclase 290 RIT-----ERGASF-----AAGFNP<sup>DGDTTSVAIAALS</sup>MAGAATSCHSLAH  
*S.cellulosum* cyclase 287 ALR-----PEGIGM-----SDAFTQ<sup>DGDI<sup>TS</sup>TVIATLGELAA</sup>PRAI<sup>EA</sup>LRR  
*M.tuberculosis* cyclase 275 QHW-----VRRGVG--WTGNSTLE<sup>CDTTSVAYDVL<sup>SK</sup>FGRSPDIAVGL</sup>  
*S.clavuligerus* cyclase 277 PGG-----VPVPG-----FEP<sup>ADDDTAVTLHLA</sup>TEL<sup>GVPYRPEVLD</sup>  
*K.griseola* cyclase 269 GFS-----DSGIGG-----GGLPFP<sup>DGDDTAYANLAGDKL</sup>GAPTHPEILMK  
*A.acidocaldarius* SHC 346 TVPGD---WAVKRPNLKPGGF<sup>AF--QFDNVYYPD</sup>VDDTAVVVWALN<sup>TLRLRPDERRRDA</sup>  
Human OSC 421 SQVPDNP<sup>PDYQKYRQMRKGGFS</sup>FTLDCGWI<sup>VS</sup><sup>DCTAEAL</sup>KAVLL<sup>LQEK</sup>CPHVTEH<sup>IPR</sup>  
Consensus 421 -l-----glg-----a--f--Daddtav-1-vl--g-p---d-l--

*B.japonicum* CPS 321 FEIGELFVTFPGERN-----ASVSTNIHALHA  
*X.oryzae* cyclase 322 FERGALFVTFPGERN-----ASVSTNIHALHA  
*B.multivorans* cyclase 331 FASDGVVATCPGERN-----PSLSTTVHAMHA  
*S.cellulosum* cyclase 328 FERGGMFITYANELQ-----PSLTTNAHAMHA  
*M.tuberculosis* cyclase 319 FEDADWFRTYFHEVG-----PSISTNVHVLGA  
*S.clavuligerus* cyclase 315 FRTGDHFACYLGEDT-----GSVSTNAHVLLA  
*K.griseola* cyclase 310 FWAEDHFVSY<sup>PEQ</sup>T-----PSVTNAHALEY  
*A.acidocaldarius* SHC 400 MTKGFRWIVGMOSS<sup>NGGWGA</sup>YDVNTSDLPNHIP<sup>FCDFGEV---</sup>TDPPSE<sup>DVT</sup>AHVLE<sup>C</sup>  
Human OSC 481 ERLCDAVAVLLNMRN<sup>PDGGFATYETKRGHLELLNPS</sup>EVFGDIMIDY<sup>TYVECTSAVMQA</sup>  
Consensus 481 f--ge-fvtf-ge-n-----psvstn-hal-a

*B.japonicum* CPS 348 LRLLGK--PAAGASA-----YVEANRNPHGLWDNEK<sup>WHVS</sup>WLYPT<sup>TAHAVA</sup>LAQ<sup>G</sup>  
*X.oryzae* cyclase 349 LRLLGE--PAVATRT-----YVETNRNPEGVWGNEK<sup>WHVS</sup>WLYPT<sup>TAHAIA</sup>LAQ<sup>G</sup>  
*B.multivorans* cyclase 358 LRLQRE--PRTVASA-----HVLAKRDADGLWRGDK<sup>WHVS</sup>PF<sup>FLT</sup>CHAVAA<sup>L</sup>DHD  
*S.cellulosum* cyclase 355 LASRGE--KASEPAR-----YLLERQQFDGRWVGDK<sup>WHSS</sup>WLYTT<sup>S</sup>QVILALSHE  
*M.tuberculosis* cyclase 346 LKQAGY--DKCHPRV---KVLEFIRSSKEP<sup>G</sup>RFCWRDK<sup>WHRS</sup>AYYT<sup>TAHLI</sup>CAASN-  
*S.clavuligerus* cyclase 342 LGTWTR--HHPDTADHGNTIRLLGRWL<sup>VER</sup>QHG<sup>DGHWD</sup>-DKWHAS<sup>PPY</sup>YATA<sup>AKVT</sup>ALSRH  
*K.griseola* cyclase 337 LNHLRM--RRGITEFG-AVEDACA<sup>EWVISQ</sup>TEDGCWY-DKWNV<sup>SPY</sup>YSTA<sup>ACV</sup>EALLDA  
*A.acidocaldarius* SHC 456 FGSFGY--DDAWK<sup>VIR---</sup>-RAVEY<sup>LKRE</sup>QK<sup>PDGS</sup>WFG-RWGVN<sup>YLY</sup>YGT<sup>GAVV</sup>SALKAV  
Human OSC 541 LK<sup>YFH</sup>KRFP<sup>EHRAE</sup>IRE<sup>TLT</sup>QGLE<sup>FCRRQ</sup>Q<sup>RADGS</sup>WEGS-<sup>WGVCF</sup>TYG<sup>TW</sup>FGLE<sup>A</sup>FACM  
Consensus 541 lr--g-----yv---q-pdg-w--dkWhvsw-y-Ta--v-Al--

*B.japonicum* CPS 396 K-----PQWRDERALAA<sup>LLQAQR</sup>DDGGW<sup>AGR-GST</sup>FEETAYALFALH<sup>VMDG-SEEAT</sup>  
*X.oryzae* cyclase 397 H-----PRWRDECALAA<sup>LLQAQQ</sup>ADGGW<sup>AGS-APT</sup>FEETAYALFALH<sup>AVDS-GETPE</sup>  
*B.multivorans* cyclase 406 E-----VDRHGAQ<sup>TLEGLLQAQR</sup>ADGGW<sup>AGTG-TPN</sup>FEETAYAVLTI<sup>DRLCARGPMP</sup>  
*S.cellulosum* cyclase 403 G-----QLPAVKRGL<sup>EALLRQR</sup>GDGGW<sup>AGG-APT</sup>AETAYAVLALRA<sup>ARRNRELES</sup>  
*M.tuberculosis* cyclase 398 Y-----DDALCSDA<sup>IGWILNTQR</sup>PDGS<sup>WGF</sup>FDGQATA<sup>EETAYC</sup>IQA<sup>LAH</sup>WQ<sup>RESS</sup>TSL  
*S.clavuligerus* cyclase 399 GGPE---AADALRRA<sup>ARWVRETR</sup>TDSG<sup>WGI</sup>W-GTAE<sup>EYAA</sup>QIL<sup>L</sup>LD<sup>PAPEPT---</sup>  
*K.griseola* cyclase 393 RKQDEP--QLDSLRR<sup>AREWLLRHQT</sup>DSG<sup>WMAE--</sup>PSPE<sup>EYAA</sup>QIL<sup>L</sup>DLFAS<sup>RGGEG-</sup>  
*A.acidocaldarius* SHC 508 G--IDT--REPYIQ<sup>KALDWVEQHNP</sup>PDGGW<sup>EDC--RS</sup>YED<sup>PAYAG</sup>KGAS<sup>T</sup>SQTAWALM  
Human OSC 600 GQTYRDGTCAEVS<sup>RACDFLLSRQ</sup>MADGGW<sup>EDF--ES</sup>CE<sup>RRY</sup>VQS<sup>AQS</sup>QI<sup>HNT</sup>CWAMM  
Consensus 601 -----v-ralewll--qr-dGgWg-----t-eetaYal-al-----

*B.japonicum* CPS 447 GRRR---IAQVVARALEWMLAR<sup>AAHGLPQTP</sup>LWIGKELY<sup>CPTRVVR</sup>VAELAGL<sup>LWL</sup>ALR  
*X.oryzae* cyclase 448 ARRL---IAQAVAQARAWMLAR<sup>YVPHALPQTT</sup>LWIGKELY<sup>CPLLVVR</sup>VT<sup>ELAG</sup>LWLALQ  
*B.multivorans* cyclase 458 AAR-----TSL<sup>LKA</sup>FRLMRDCY<sup>SPRAQAS</sup>MLWINKELSR<sup>PTRVVR</sup>AVELAGL<sup>WVAHR</sup>  
*S.cellulosum* cyclase 455 MAR-----GAWRR<sup>GRD</sup>WLSNHD<sup>IGAGQ</sup>EDLRWIGKELY<sup>CPARVDR</sup>AWVL<sup>GALL</sup>ASQP  
*M.tuberculosis* cyclase 451 S-----AQISRA<sup>GGWLSQ</sup>CEPPYAP---LWI<sup>AK</sup>TLYCSAT<sup>VV</sup>KAA<sup>ILS</sup>ALRL<sup>VD</sup>  
*S.clavuligerus* cyclase 449 ------TDVLC<sup>GAH</sup>LTARADDD<sup>GPPAL</sup>WHD<sup>KT</sup>LFA<sup>PD</sup>IVRAEVL<sup>STL</sup>RL<sup>LD</sup>  
*K.griseola* cyclase 448 ------AE<sup>ECAA</sup>ISRAKE<sup>F</sup>TDESREN<sup>PL</sup>WMG<sup>KD</sup>LY<sup>TF</sup>FRI<sup>V</sup>DVTVM<sup>CGRA</sup>AV<sup>VR</sup>  
*A.acidocaldarius* SHC 562 ALIAGRAE<sup>EAAR</sup>RGV<sup>YLVE</sup>TQR<sup>PDGGW</sup>DEPY<sup>YT</sup>GTG<sup>FP</sup>DFL<sup>GY</sup>TM<sup>YR</sup>HV<sup>PT</sup>LAL  
Human OSC 658 GLMAVRHPDIEAQER<sup>GVRC</sup>LLER<sup>QL</sup>PNGD<sup>WP</sup>QENIAG-VFNKSA<sup>IS</sup>YS<sup>YR</sup>NI<sup>FP</sup>I<sup>W</sup>AL  
Consensus 661 g-----v-ra--wml-----ga---lwigkely-p--vvr--l-g-l-1--

*B.japonicum* CPS 503 WGRRLVLA--EGAGAAP-----  
*X.oryzae* cyclase 504 WEQR<sup>AAD</sup>GV<sup>THT</sup>GAAP-----  
*B.multivorans* cyclase 511 RAEAL<sup>E</sup>AA<sup>CC</sup>-----  
*S.cellulosum* cyclase 508 SVE<sup>S</sup>-----  
*M.tuberculosis* cyclase 499 S<sup>NQ</sup>-----  
*S.clavuligerus* cyclase 499 RLPAPAPVPPGFDAART<sup>GPAD</sup>  
*K.griseola* cyclase 499 Y-----  
*A.acidocaldarius* SHC 622 GR<sup>YK</sup>QAIERR-----  
Human OSC 717 GR<sup>F</sup>SQLYPERALAGHP-----  
Consensus 721 -----

Figure S2: Graph showing correlation between the number of predicted helices (red) (COUDES program)<sup>1</sup> and turns (blue) versus number seen experimentally in SHC, OSC, FTase I, GGTase I, GGTase II, FPPS, GGPPS, SQS and CrtM ( $\geq 5$  helical residues define a helix;  $\geq 4$  turn residues define a turn).

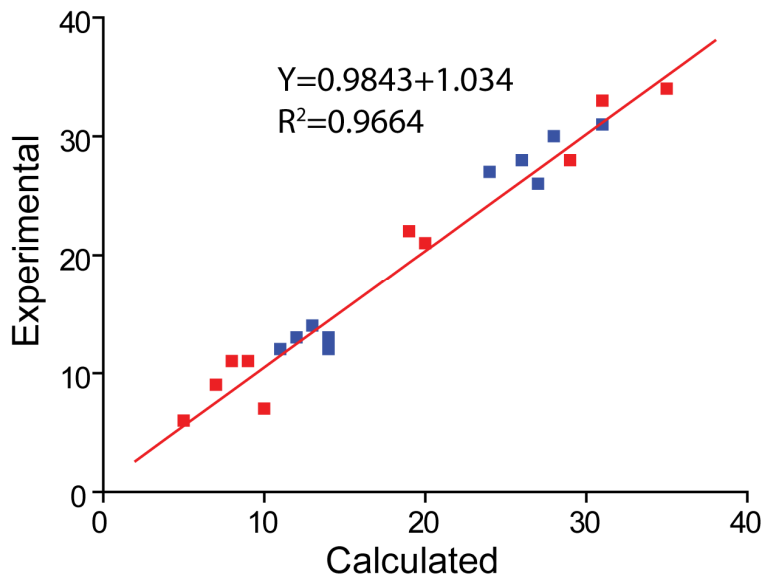

Figure S3: Full alignment of 228 terpene synthases obtained by using the JPRED3<sup>4</sup> program. The target sequence (at the top of the output) is abietadiene synthase from *Abies grandis*, minus the plastid targeting segment<sup>5</sup>.

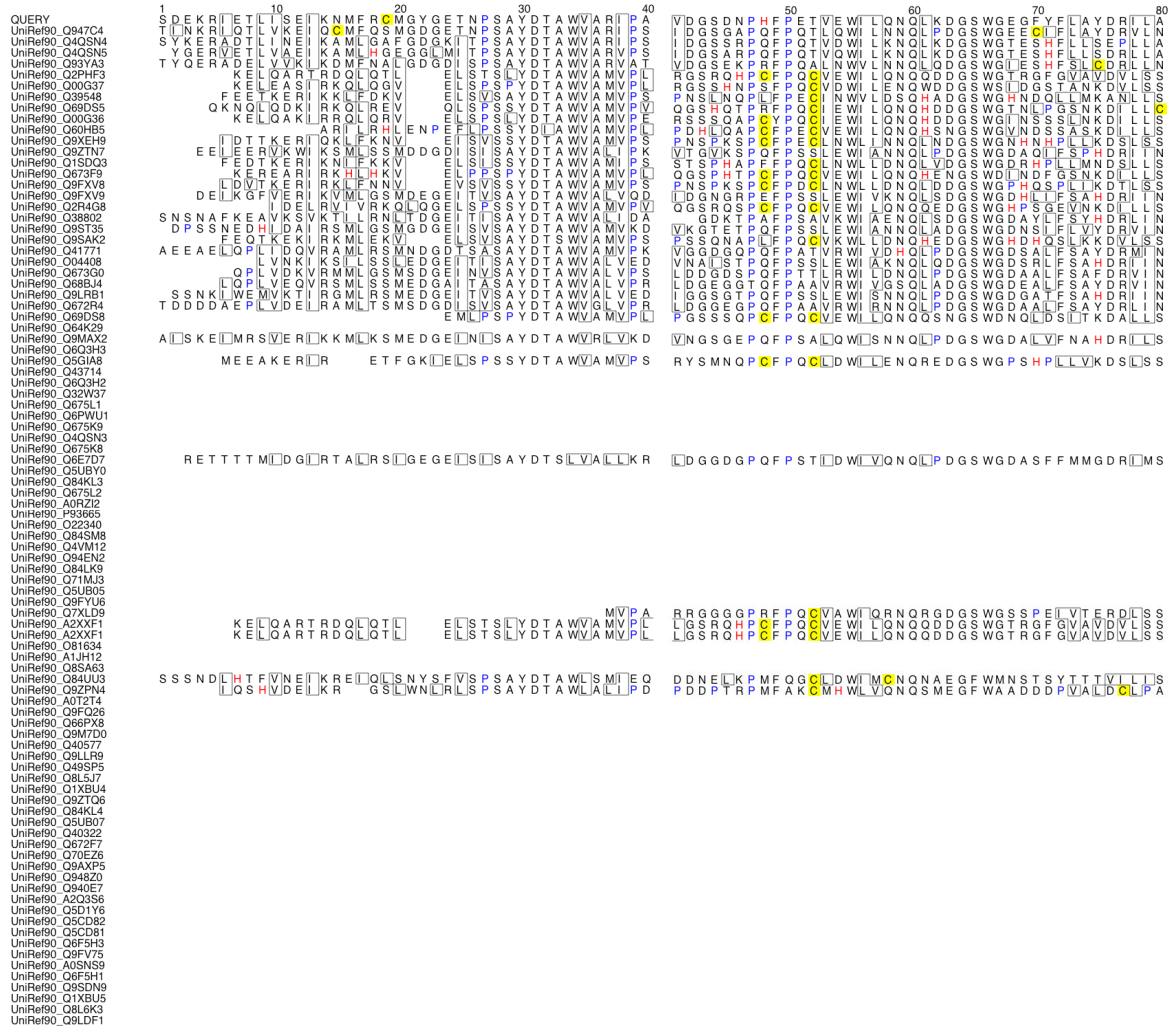





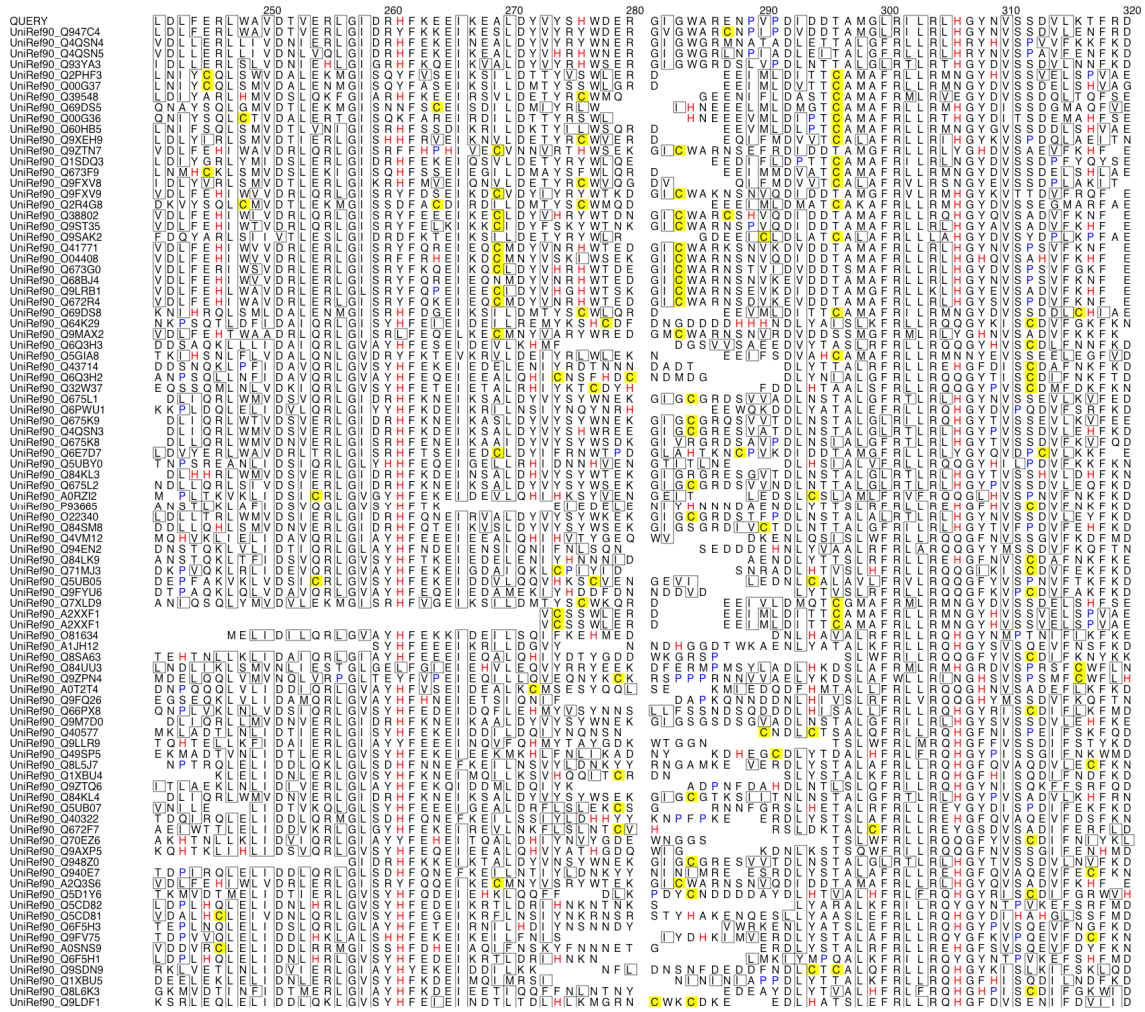

Figure S3 (continued).













QUERY  
 UniRef90\_Q947C4  
 UniRef90\_Q40SN4  
 UniRef90\_Q40SN5  
 UniRef90\_Q39Y43  
 UniRef90\_Q2PHF3  
 UniRef90\_Q00G37  
 UniRef90\_Q39548  
 UniRef90\_Q69D55  
 UniRef90\_Q00G36  
 UniRef90\_Q60HB5  
 UniRef90\_Q9XEH9  
 UniRef90\_Q32TN7  
 UniRef90\_Q1SDQ3  
 UniRef90\_Q673F9  
 UniRef90\_Q9FXV8  
 UniRef90\_Q8FXV9  
 UniRef90\_Q2R4G8  
 UniRef90\_Q38802  
 UniRef90\_Q95T35  
 UniRef90\_Q85AK2  
 UniRef90\_Q41771  
 UniRef90\_Q04408  
 UniRef90\_Q673G0  
 UniRef90\_Q68BJ4  
 UniRef90\_Q9LRB1  
 UniRef90\_Q672R4  
 UniRef90\_Q69D58  
 UniRef90\_Q64K29  
 UniRef90\_Q9MAX2  
 UniRef90\_Q6C3H3  
 UniRef90\_Q5GIA9  
 UniRef90\_Q43714  
 UniRef90\_Q6C3H2  
 UniRef90\_Q32W37  
 UniRef90\_Q67SL1  
 UniRef90\_Q6PWU1  
 UniRef90\_Q675K9  
 UniRef90\_Q40SN3  
 UniRef90\_Q673K6  
 UniRef90\_Q6E7D7  
 UniRef90\_Q5UBY0  
 UniRef90\_Q84KL3  
 UniRef90\_Q67SL2  
 UniRef90\_A0RZ12  
 UniRef90\_P93665  
 UniRef90\_Q22340  
 UniRef90\_Q84SM8  
 UniRef90\_Q4VM12  
 UniRef90\_Q94EN2  
 UniRef90\_Q84LK9  
 UniRef90\_Q71MJ3  
 UniRef90\_Q5UB05  
 UniRef90\_Q9FYU6  
 UniRef90\_Q7XLD9  
 UniRef90\_A2XXF1  
 UniRef90\_A2XXF1  
 UniRef90\_Q81634  
 UniRef90\_A1UH12  
 UniRef90\_Q85A63  
 UniRef90\_Q84UJ3  
 UniRef90\_Q927N4  
 UniRef90\_A0T2T4  
 UniRef90\_Q9FQ26  
 UniRef90\_Q66PX8  
 UniRef90\_Q9A7D0  
 UniRef90\_Q40577  
 UniRef90\_Q9LLR9  
 UniRef90\_Q49SP5  
 UniRef90\_Q8LSJ7  
 UniRef90\_Q1XBU4  
 UniRef90\_Q9ZT06  
 UniRef90\_Q84KL4  
 UniRef90\_Q5UB07  
 UniRef90\_Q40322  
 UniRef90\_Q672F7  
 UniRef90\_Q70E26  
 UniRef90\_Q9AXF5  
 UniRef90\_Q948Z0  
 UniRef90\_A2Q3S6  
 UniRef90\_Q5D1Y6  
 UniRef90\_Q5CD82  
 UniRef90\_Q5CD81  
 UniRef90\_Q6F5H3  
 UniRef90\_Q8FV75  
 UniRef90\_A0SNS9  
 UniRef90\_Q6F5H1  
 UniRef90\_Q95DN9  
 UniRef90\_Q1XBU5  
 UniRef90\_Q8L6K3  
 UniRef90\_Q9LDF1

F E T A R I M Q L F V M Q G D G L L S H D M E K E H V K N C F P P V I A  
 F N T A R V M O L E Y M Y R D G F G L I S K K E M K D H V S R T L L E D P P V I A  
 F E E T R V I T M V I F K D G D R L S N S K L E M K D H V K E C L L E D P P L  
 M E E T R V I T M V I F K E G D G F G I S K T K I K D V I K D C L L E D P P L  
 F N L R L Q V Q I F Y K F G D G F G I A N E E T K D V I R K V I L D P I  
 W K M C K I L H L F Y Y Q T D G F S S P K E M V I S A V N A V I L D P P L  
 W K M C K I L H L F Y Y Q T D G F S S P K E M V I S A V D A V I L D P P L  
 W K L M S I V N L F Y M E D D G Y T S N R G L M N T V K A M F L E O P M  
 W F M S K V L H F Y M E K D G Y F Y A D G V M A S A N A V I L D P P L  
 W E M C K I L V F Y F Y S E D D A Y R T P K E T M S S A R A V I L D P P L  
 W N L Y K T S H V F Y S Q A D G F S S P K E M M G A M N G V I L D P P L  
 W N Q H V L N F Y A N D D G F T G N T L L D T V K D I L Y N R V  
 L T V A K S V Y Y A A Y F D A W T I N Y H I A K V L F E R V  
 W K M M K A S Y L F Y D E N D K F T L N E M Y S T V N A V I L D P P L  
 W K M C K I L H L F Y F R T D G F S S P K E M A S A V N A V I L D P P L  
 W N M C N V L N L F Y A T D D G F T G N A L L D V V K E L Y E P V S  
 W H T G K V A S V F Y Q E G D Y A R K A M R S M A N A V I L E P L  
 L D V A K A F Y Y F A L C G D H L Q T H L S K V L F O K V  
 L K M S K V L N L F Y R K D D G F T S N D L M S L V K S V I Y E P V S  
 W D V L R S L Y A T H S P Q H M I D R H V S R V I F E P V  
 F T L A K S F Y A A F C D S R T L N F H L A K V L F E K V  
 W K M C K V Q Y F F Y S R G D G F S S P  
 L N L A R V I D V V Y K D E D G Y T N A G T V L K D L V S A L L L D P V  
 F T V V K S I Y Y T T V C D L G T T N Y H M S K V L F E R V  
 L N L A R V I D V T Y K N E D G Y T H F G A V L K D F V T S M L D P V  
 W T L T N A A Y S L H T H G F W I S L P R G L K D P Y Q R Q N L O  
 L N L A R V M D V I Y R E G D G Y T H V G K A A K G G I T S L L D P I  
 L N F T R T M D V I Y K E O D S Y T H P V G K V M R D N I A S V I N A V  
 L N L A R V L V I Y Q D E D G Y T H P G T K V E N E V S V L I D S M  
 F D I T R A L H L Y K Y R D G Y S V I A T K E T K S V L S M V I E P V  
 M N L A R M A Q M Y Q H G D G H G I E Y G E T E D R V L S L L V E P I  
 F D I T R A L H L Y K Y R D G Y S V I A N K E T K N L V E K T L L E P M  
 Y D V L R A F H V G Y K Y R D G Y S V I A N I E T K N E V A S V I E P V  
 F D I L R A F H L Y K Y R D G Y S V I A K I E T K N L V M R T L E P V  
 L N L S R V T D V I Y K D G D Y T N S Q G S T K N D I T S L L L N P  
 F D I Q R V F H V G Y K Y R D G F S V I A S L I E T K N L V T R T V E T V  
 F D I T R A F H L Y K Y R D G Y S V I A R E I R N L V M T T V I H V  
 L N L S R F M D V I Y K N K D N Y T D S D G L M K T Q I K E V L V D P P I  
 L N L A R V M D V I Y R E G D G Y T Y V G K A A K G G I T S L L E P I A  
 F D I T R A F H L Y K Y R D G Y T W I S A N K E T K N L V M K T V I E P V  
 F D I N R G L H H Y N Y R D G Y T V I A S N E T K N L V I K T V I E P V  
 L N L A R M C E V I Y S V N D G F T H A E G D M K S Y M K S F F H P M  
 L N F S R M D V I Y K E D D G Y T N P K S K V K D L T A S L V E S V  
 L N L S R V M D V I Y K E D G Y T Y V I R K A M K D V I T S L L E P V  
 L N L A R A L D F I Y K E D D G Y T H S Y L K K D O I A S V L G D P I  
 L N F S R F M D V I Y T K D N Y T H V I E G L M K T Y I K D V L D P I  
 F N I A R V T E F L N K G D W Y T H S H A L K D Q L A A V L R D P V  
 W S M C K V C H F F Y S G D G F S S P  
 L N L P R M A E T V Y K K C D S Y T H S S T M K D V I M S L L V E P I S  
 L N L A R M A Q M Y Q H G D G H G H G N H E T K D R I S S L L I O P I  
 L N L A Q V M D V I Y K K D G F T N V I G E E L K D H I K S L L V H P I  
 T S C Q K V F E M F F N K K N R Y D S N T E M L H I D I K K A L Y D P I  
 C L K I F N M F F N S N L Y D S H D D T H L F D I O K A F I L P  
 F N M L Q V I H C L Y Q O K D A Y T F S N N S T K E M I T S V L V D P V  
 L N F T R V I D T L Y Q E E D E Y T N A K G K L K N M I H S I L I E S V  
 L N L T R V M A L L Y S H E D G Y T N S K G R T K L L Q S L L D P L  
 F D I L K G S L H G Y K Y R D G F S V I A N K E T K N W V R T V E S V  
 L N L A R L V E V I Y H N D G Y T H P E K V L K P H I L L V D S I  
 L N F S R S I D V I Y K N K D H F T H V G V E V I N I K S L V D A I  
 R N F S R M D V I Y K N E D G Y S K P E K I L K P L T A A F V D Q  
 M S M G R M G Q Y M Y H Y G D G H G I O H S L I H Q O M S T L F H P  
 K N I A T T A H C M Y L K G D S H G I O N T D V K N S I S N L H P  
 L N L A R I D V I Y K H N D G Y T H P E K V L K P H I L L V D S I  
 F D I T R A F H Y G Y K Y R D G Y S V I S S V E T K S L V M R T L L E P V  
 T N L A R I S H G T Y Q Y G D G H G A P D T L A K N R L K A L I E P I  
 V D L G R M A Q L M Y H N G D G H G T O H P T L H Q O M T R T L E P F A  
 T N L A R I A O C Y Q T G D G H G A P D S I A K N R V K S L I E P I S  
 L N L A R V I D M L Y K N D N L K N V G O E I Q D Y I K S L E I N A I  
 L S L A R V S D I L Y K T N N G Y N H A G E V I L M K V I L V H P L  
 F D I S R V W H G Y R Y R D G Y S F A N V E T K S L V M R T V I E P V  
 E D L G R M A Q F M Y H Y G D G H G T O H P K I H Q O I A A C L F O P F A  
 F T V A K S F Y A A F C D S R T I N F H I A K V L F E D K V I  
 L N L E R L H V A Y K D S D G Y T Q P E K V L K P H I L L E P I A  
 M N L A R M S Q C M Y Q F G D G H G H G V Q E L T K A R V L S L L V D P I  
 M N L A R M A Q C Y Q N G D R H T V I Q D N S K N R V L P L L I H P I  
 A D M G R M A Q F M Y H N G D G H G I O N P O I H Q O M T D I L E P  
 A N L G R M A Q C Y Q H R D G F G M O H S L V N K M L R G L L L E D  
 M N L V R M S O C M Y L Y G D G H G V I Q E N T K D R V L S L E P I  
 L N V V R V S H F M Y L H G D H G A Q N O E T M O D V F T L E P  
 K N I T K A S H F M Y L H S D E K V L K P H I V A L L V D S I  
 L N F N R I M D V I Y K N K D G Y T Q P E K V L K P H I L L E P D O I  
 M N L A R M S O C M Y Q Y G D H G C P E K A K T I D R V Q S L L V D P I

Figure S3 (continued).

|  |   |    |    |    |    |    |    |    |    |
|--|---|----|----|----|----|----|----|----|----|
|  | 1 | 10 | 20 | 30 | 40 | 50 | 60 | 70 | 80 |
|--|---|----|----|----|----|----|----|----|----|

UniRef90\_Q94G53  
UniRef90\_Q84LU6  
UniRef90\_Q84KL2  
UniRef90\_Q84404  
UniRef90\_Q8ZUH4  
UniRef90\_A2Q848  
UniRef90\_Q8W119  
UniRef90\_Q2XS05  
UniRef90\_Q9FV12  
UniRef90\_Q23516  
UniRef90\_Q09HU5  
UniRef90\_A2Q852  
UniRef90\_Q2IHU6  
UniRef90\_Q675L0  
UniRef90\_Q8LH31  
UniRef90\_Q81192  
UniRef90\_Q86376  
UniRef90\_Q86CL9  
UniRef90\_Q84U04  
UniRef90\_Q8EJ97  
UniRef90\_Q84405  
UniRef90\_Q2TJK5  
UniRef90\_P58287  
UniRef90\_Q5CL36  
UniRef90\_A0RZ13  
UniRef90\_Q0PC13  
UniRef90\_Q8GU54  
UniRef90\_Q9LQ27  
UniRef90\_Q9C6W6  
UniRef90\_A2YDV8  
UniRef90\_Q485P6  
UniRef90\_UP1000004870C  
UniRef90\_A2X444  
UniRef90\_Q01L21  
UniRef90\_Q5SBP0  
UniRef90\_A2YR19  
UniRef90\_Q5SBP6  
UniRef90\_A0ERE2  
UniRef90\_Q485P4  
UniRef90\_Q8H2B4  
UniRef90\_Q5SBP4  
UniRef90\_Q84NE5  
UniRef90\_Q8SPN1  
UniRef90\_Q8YN71  
UniRef90\_Q5SBP1  
UniRef90\_Q66NG3  
UniRef90\_Q485P3  
UniRef90\_A0F037  
UniRef90\_A2XGN2  
UniRef90\_Q2XSC4  
UniRef90\_Q84LU9  
UniRef90\_Q8AR04  
UniRef90\_A0ERE1  
UniRef90\_Q84LV1  
UniRef90\_Q2M4M3  
UniRef90\_Q01KN7  
UniRef90\_Q0VHD8  
UniRef90\_A2ZSN9  
UniRef90\_UP10000162AD9  
UniRef90\_Q5G4S4  
UniRef90\_Q0JE23  
UniRef90\_Q29VN3  
UniRef90\_Q84LS8  
UniRef90\_Q0J834  
UniRef90\_Q86PX9  
UniRef90\_Q81193  
UniRef90\_Q0JE19  
UniRef90\_Q2NM14  
UniRef90\_Q01LN7  
UniRef90\_Q75WN1  
UniRef90\_Q8LA1  
UniRef90\_Q8LVP7  
UniRef90\_Q01HA9  
UniRef90\_Q1PD02  
UniRef90\_Q6JD69  
UniRef90\_Q5GJ60  
UniRef90\_Q60WJ1  
UniRef90\_Q1T1D0  
UniRef90\_Q7570  
UniRef90\_Q22980  
UniRef90\_Q5GJ59  
UniRef90\_Q5SBP3  
UniRef90\_Q84LV0  
UniRef90\_Q65437  
UniRef90\_Q65435  
UniRef90\_Q5GJ58  
UniRef90\_Q10L24  
UniRef90\_Q10L17  
UniRef90\_Q5SBP7  
UniRef90\_Q8ZVM4  
UniRef90\_Q4U3F6  
UniRef90\_Q7XNL0

SSSSEQLQFLVLDKVKRESLSSSSNTONTLPYDTAWLALTPHPHHGRPFMEKQLQWTLHNOTPQGFWAAAGDDVITLDQLLS  
ASTSELPLPYMILESLKSKLRAAASLGETTVISAYDTAWLALVNRQLDGRSPQFPEALDQWLAARNQLPDGSGWDAGMFLVQDRLLIN

Figure S3 (continued).

UniRef90\_Q94G53  
UniRef90\_Q84UJ6  
UniRef90\_Q84L2  
UniRef90\_Q64404  
UniRef90\_Q9ZUJ4  
UniRef90\_AZC549  
UniRef90\_Q8W1J9  
UniRef90\_Q2XSC5  
UniRef90\_Q9FYL2  
UniRef90\_Q23516  
UniRef90\_Q08HU5  
UniRef90\_A20K52  
UniRef90\_Q20HU6  
UniRef90\_Q67SL0  
UniRef90\_Q8LH31  
UniRef90\_Q81192  
UniRef90\_Q96376  
UniRef90\_Q88CL9  
UniRef90\_Q84UJ4  
UniRef90\_Q8E197  
UniRef90\_Q64405  
UniRef90\_Q2TJK5  
UniRef90\_Q59287  
UniRef90\_Q50L36  
UniRef90\_A0RZ13  
UniRef90\_Q0PC13  
UniRef90\_Q8GUE4  
UniRef90\_Q8LQ27  
UniRef90\_Q8C3W6  
UniRef90\_A2YDV8  
UniRef90\_Q49SP6  
UniRef90\_UPI00004870C  
UniRef90\_A2X414  
UniRef90\_Q0L121  
UniRef90\_Q5S8P0  
UniRef90\_A2YRL9  
UniRef90\_Q5S8P6  
UniRef90\_A0ERE2  
UniRef90\_Q49SP4  
UniRef90\_Q8H2B4  
UniRef90\_Q5S8P4  
UniRef90\_Q84NE5  
UniRef90\_Q6SPN1  
UniRef90\_Q6YN71  
UniRef90\_Q5S8P1  
UniRef90\_Q8R0K3  
UniRef90\_Q49SP3  
UniRef90\_A0F0E7  
UniRef90\_A2XGN2  
UniRef90\_Q2XSC4  
UniRef90\_Q84UJ9  
UniRef90\_Q8AR04  
UniRef90\_A0ERE1  
UniRef90\_Q84UJ1  
UniRef90\_Q2M4M3  
UniRef90\_Q01KN7  
UniRef90\_Q0V1D6  
UniRef90\_A2ZSN9  
UniRef90\_UPI000162AD9  
UniRef90\_Q5GAS4  
UniRef90\_Q0JE23  
UniRef90\_Q29VN3  
UniRef90\_Q84J58  
UniRef90\_Q0J834  
UniRef90\_Q66FX9  
UniRef90\_Q81193  
UniRef90\_Q0JE19  
UniRef90\_Q2NM14  
UniRef90\_Q01LN7  
UniRef90\_Q75WN1  
UniRef90\_Q8LIA1  
UniRef90\_Q8LVP7  
UniRef90\_Q01HA6  
UniRef90\_Q1PDD2  
UniRef90\_Q6JD69  
UniRef90\_Q5GJ60  
UniRef90\_Q5QWJ1  
UniRef90\_Q11D0  
UniRef90\_Q75I70  
UniRef90\_Q226R0  
UniRef90\_Q5GJ58  
UniRef90\_Q5S8P3  
UniRef90\_Q84UJ0  
UniRef90\_Q65437  
UniRef90\_Q85435  
UniRef90\_Q5GJ58  
UniRef90\_Q10L24  
UniRef90\_Q10L17  
UniRef90\_Q5S8P7  
UniRef90\_Q6ZVM4  
UniRef90\_Q4U3F6  
UniRef90\_Q7XNL0

90 100 110 120 130 140 150 160

T L A G L V A L K R W Q L A P D M I H K G L E F V N R N T E R V M K Q K P S D V P R W F T I M F P A M L E L A G A S S L R V D F S E R I L V E L S Q N R D D L L  
T L G C V Y A L J A T W G V R E E Q R A R G L J A Y L Q D N L W R L G E D D E E W M M V G F E I L T F P V L L E K A R N L G L D I N Y D D P A L Q G L Y A K R Q L K L

Figure S3 (continued).



UniRef90\_Q94G53  
UniRef90\_Q84U06  
UniRef90\_Q84K12  
UniRef90\_Q64404  
UniRef90\_Q9ZUH4  
UniRef90\_A22649  
UniRef90\_Q8W1J9  
UniRef90\_Q2XSC5  
UniRef90\_Q8FYL2  
UniRef90\_Q23516  
UniRef90\_Q08HU5  
UniRef90\_A22652  
UniRef90\_Q20HU6  
UniRef90\_Q67510  
UniRef90\_Q9LH31  
UniRef90\_Q81192  
UniRef90\_Q96376  
UniRef90\_Q86C19  
UniRef90\_Q84U04  
UniRef90\_Q6EJ87  
UniRef90\_Q64405  
UniRef90\_Q2TJK5  
UniRef90\_P59287  
UniRef90\_Q59136  
UniRef90\_A0RZ13  
UniRef90\_Q0PC13  
UniRef90\_Q86UE4  
UniRef90\_Q9LQ27  
UniRef90\_Q9C6W6  
UniRef90\_A22VY9  
UniRef90\_Q49SP6  
UniRef90\_UP1000004870C  
UniRef90\_A2X444  
UniRef90\_Q01L21  
UniRef90\_Q5SBP0  
UniRef90\_A22YR19  
UniRef90\_Q5SBP6  
UniRef90\_A0ERE2  
UniRef90\_Q49SP4  
UniRef90\_Q8H2B4  
UniRef90\_Q5SBP4  
UniRef90\_Q8AN65  
UniRef90\_Q8SPN1  
UniRef90\_Q6YN71  
UniRef90\_Q5SBP1  
UniRef90\_Q66NG3  
UniRef90\_Q49SP3  
UniRef90\_A0R057  
UniRef90\_A2XGN2  
UniRef90\_Q2XSC4  
UniRef90\_Q84UJ9  
UniRef90\_Q9AR04  
UniRef90\_A0ERE1  
UniRef90\_Q84UJ1  
UniRef90\_Q2M4M3  
UniRef90\_Q01KN7  
UniRef90\_Q0VH06  
UniRef90\_A2ZSN9  
UniRef90\_UP10000162AD9  
UniRef90\_Q5GAS4  
UniRef90\_Q0JE23  
UniRef90\_Q29VN3  
UniRef90\_Q84IS9  
UniRef90\_Q0J834  
UniRef90\_Q66PX9  
UniRef90\_Q81193  
UniRef90\_Q0JE19  
UniRef90\_Q2NM14  
UniRef90\_Q01LN7  
UniRef90\_Q75WN1  
UniRef90\_Q9LIA1  
UniRef90\_Q9LV57  
UniRef90\_Q01HA9  
UniRef90\_Q1PD02  
UniRef90\_Q6LD99  
UniRef90\_Q5GJ60  
UniRef90\_Q6QWJ1  
UniRef90\_Q1T1D0  
UniRef90\_Q75I70  
UniRef90\_Q22680  
UniRef90\_Q5GJ59  
UniRef90\_Q5SBP3  
UniRef90\_Q84UV0  
UniRef90\_Q65437  
UniRef90\_Q65435  
UniRef90\_Q5GJ58  
UniRef90\_Q10L24  
UniRef90\_Q10L17  
UniRef90\_Q5SBP7  
UniRef90\_Q6ZVM4  
UniRef90\_Q4U3F6  
UniRef90\_Q7XNL0

170 180 190 200 210 220 230 240

S T Y F S P S L W G D H F L S V S D R G E F D E E R T M K P L V K D M C M S S Q  
H S L N S P Y G A P A Y Y E L L Q K L T O E L K H L L L T E M E  
F S P S L W G D V F L Q Y D S Q P M E L N D N Q M Q K E E V R K L F Q S S S  
L H V D E T R R S G N Y R P S A W D S N Y L Q S K E K K L T R L E G L L E Q V K E L G T K  
D V K P V Q E G R R S G N Y Q P S L W D F N Y V Q S L N Y K E E R Y L T R H A E L L V Q V K P  
S L F S P S L W G D Y F L S V F D D A R E L E S V M K P Y V R D R L T S S H  
T R E E V D E K K Q Y S P L L L F L E A L P A Q S Y D N D V L K N L S N D G S L L Q S P S A T A R A Y M I T G N T R O L S Y L H S L T N S G N G G V P S F Y P  
A K L P R E A L H A R P T T L L L H S L E G M E N L D W E R L L Q P K P A G S L H S S P A A S A Y A L S E T G D K E L L E Y L E T A T T N F D G G A P D T Y P  
V R G M L N R V D  
A Y H L L G A N E W E E K E H G D L K E E V R K M L L M T S  
K P K V R N M C M S S H  
F L Y H S S T T A A S Y Q Q Q E W L V Q L E R Q K E E V G N M I T S S V T  
D L A W M L R L E K L K E E V A T M I T S S L K  
P T T R R S G N Y E P S A W D F N Y L Q N Y H H K E E R Y L R R D L L E K V K M C L K E E K  
L L Q E V S K M L N E T E  
F P P S L W A N R F L S F S N S E L E A Y A N A H E K E S V R S L T D T T  
Y O P S A W D F N Y L Q S L N N H S K E E R H L E R K A K L T M L L E Q E  
F H P A L F G D F L N N S D E W E E R V D Q L V E E V G R M L E V C K  
M M M D E A  
P  
H D P  
D P V L K T S K E D D Q S T K F H P S L W G D Y F L Q N S S L S A E E S T O R M I K R V E E L K V Q V K S  
D D G S Q A L E A L A L A H S W T Q A C M K G R A E V L R E E V R T L L K G L K  
F E P S V W G D F F L N Y D P K P L Q R S E D M M E K A D K L L F E T H  
H A A L K Q E V R R M I T T T A  
C P R S W A D L L M K R K A H V S E E Q V R R M L E L E E K M E L V S I T T  
L L K E E V R K T L K A A  
E R A E K L K D D V R T M F E T  
E L L K E E V R K T L K A A  
F S P S Y W G D H F L S V S L D E A L E K I E T V F K P K V R D M C M S P H  
R K L T V D P T  
E V L R E R V R K V L K G S T  
V L L K E E V R N M I L K G S H  
L L S K Y D G D E Y R K L S E K L L E E V R K L Y L S A E T  
F H P T V W G D Y F L Q V S D E T M A E R L R H L R E E V S G M F Q A C  
Q F H N K T S L E Y S H E L N L K K K N C L S A N V  
O A M K E R A E V R E D V R K L L M G P  
A T D R H R S E E W R E R V D R L K M O V G K L L K T O N  
T P  
S S L K E T V R G L L M A S K  
K E N V R R M L N P A

Figure S3 (continued).



UniRef90\_Q04653 V N G N G F K F 330 G D I T S M L I L I Y E A S Y H G V E P S E S E D I L M D A S E A E A F F T T O N Y L L K E W I E N T E 370 D O N I A L C F I H A L V I F P H C 400  
UniRef90\_Q84U06 E D G R F F K E S L A K D V R G M L Q L L Y E A S Y H G V E P S E S E D I L M D A S E A E A F F T T O N Y L L K E W I E N T E 370 D O N I A L C F I H A L V I F P H C 400  
UniRef90\_Q84KL2 H N G G F F T C G F T G E D K Q V R S M L S L Y E A S Y H G V E P S E S E D I L M D A S E A E A F F T T O N Y L L K E W I E N T E 370 D O N I A L C F I H A L V I F P H C 400  
UniRef90\_Q04604 F N G G F F T C G F T G E D K Q V R S M L S L Y E A S Y H G V E P S E S E D I L M D A S E A E A F F T T O N Y L L K E W I E N T E 370 D O N I A L C F I H A L V I F P H C 400  
UniRef90\_Q9ZU44 N O G K F L N E N T S D D T K D V G G M W S L L Y E A S Y H G V E P S E S E D I L M D A S E A E A F F T T O N Y L L K E W I E N T E 370 D O N I A L C F I H A L V I F P H C 400  
UniRef90\_A20649 E G S F K A R L L D D D T K D V G G M W S L L Y E A S Y H G V E P S E S E D I L M D A S E A E A F F T T O N Y L L K E W I E N T E 370 D O N I A L C F I H A L V I F P H C 400  
UniRef90\_Q8W1J9 N K G F L N E N T S D D T K D V G G M W S L L Y E A S Y H G V E P S E S E D I L M D A S E A E A F F T T O N Y L L K E W I E N T E 370 D O N I A L C F I H A L V I F P H C 400  
UniRef90\_Q2XSC5 E N G Y F F K H H D D T K D V G G M W S L L Y E A S Y H G V E P S E S E D I L M D A S E A E A F F T T O N Y L L K E W I E N T E 370 D O N I A L C F I H A L V I F P H C 400  
UniRef90\_Q9FVL2 A N G K F K E S L C O D D T K D V G G M W S L L Y E A S Y H G V E P S E S E D I L M D A S E A E A F F T T O N Y L L K E W I E N T E 370 D O N I A L C F I H A L V I F P H C 400  
UniRef90\_Q23516 E T G F F R K T L H S D L K G L L S L Y E A S Y H G V E P S E S E D I L M D A S E A E A F F T T O N Y L L K E W I E N T E 370 D O N I A L C F I H A L V I F P H C 400  
UniRef90\_Q09HU5 D S G S F K A S L S D N T K G L L S L Y E A S Y H G V E P S E S E D I L M D A S E A E A F F T T O N Y L L K E W I E N T E 370 D O N I A L C F I H A L V I F P H C 400  
UniRef90\_A20652 P K G G F F N E K I S I G D K D V G G M W S L L Y E A S Y H G V E P S E S E D I L M D A S E A E A F F T T O N Y L L K E W I E N T E 370 D O N I A L C F I H A L V I F P H C 400  
UniRef90\_Q20HU6 E N G K F F O S L T G D K R V R S M L S L Y E A S Y H G V E P S E S E D I L M D A S E A E A F F T T O N Y L L K E W I E N T E 370 D O N I A L C F I H A L V I F P H C 400  
UniRef90\_Q675L0 E N G O F F O S S T G D G M L T L F R A S E I S F H G G E K V M O E A K A F F T T O N Y L L K E W I E N T E 370 D O N I A L C F I H A L V I F P H C 400  
UniRef90\_Q9LH31 E D G R L K E S L T V G D V R G M L Q L L Y E A S Y H G V E P S E S E D I L M D A S E A E A F F T T O N Y L L K E W I E N T E 370 D O N I A L C F I H A L V I F P H C 400  
UniRef90\_Q81192 E K G D F K A S L A Q D T K G M L Q L L Y E A S Y H G V E P S E S E D I L M D A S E A E A F F T T O N Y L L K E W I E N T E 370 D O N I A L C F I H A L V I F P H C 400  
UniRef90\_Q84U44 D D E L R D H I E T N Y E E F A A V L L N V Y R A T D L M V S G E V I L D E A R S F A T R K L L O R K L D E P H E S S K T C R E D D N I L L S O S P L H W K  
UniRef90\_Q68CL9 K D G G Y F C A G O S S I T A M Y N S Y R A S O L V G T H G G E D I L D E A L A F A T R S R L L E I E S S A S H P H L R R R K L L D E I L D  
UniRef90\_Q84U44 E K G G Y F C A G O S S I T A M Y N S Y R A S O L V G T H G G E D I L D E A L A F A T R S R L L E I E S S A S H P H L R R R K L L D E I L D  
UniRef90\_Q8EJ97 K E G G F S G E L K G D V G G M W S L L Y E A S Y H G V E P S E S E D I L M D A S E A E A F F T T O N Y L L K E W I E N T E 370 D O N I A L C F I H A L V I F P H C 400  
UniRef90\_Q64405 D N G O F F G S T A Y N K H V R G L L S L Y E A S Y H G V E P S E S E D I L M D A S E A E A F F T T O N Y L L K E W I E N T E 370 D O N I A L C F I H A L V I F P H C 400  
UniRef90\_Q21LK9 G O G Y N K A L Y S N H G L L S L Y E A S Y H G V E P S E S E D I L M D A S E A E A F F T T O N Y L L K E W I E N T E 370 D O N I A L C F I H A L V I F P H C 400  
UniRef90\_P58287 S D G K F K E S L R G D A K G M L S L Y E A S Y H G V E P S E S E D I L M D A S E A E A F F T T O N Y L L K E W I E N T E 370 D O N I A L C F I H A L V I F P H C 400  
UniRef90\_Q50L38 S O N G F L E N L K E T K A I K M L S L Y E A S Y H G V E P S E S E D I L M D A S E A E A F F T T O N Y L L K E W I E N T E 370 D O N I A L C F I H A L V I F P H C 400  
UniRef90\_A0R233 K S G N F N E L T S D K D V G G M W S L L Y E A S Y H G V E P S E S E D I L M D A S E A E A F F T T O N Y L L K E W I E N T E 370 D O N I A L C F I H A L V I F P H C 400  
UniRef90\_Q0PC13 E S G S F V K L L G D V G G M W S L L Y E A S Y H G V E P S E S E D I L M D A S E A E A F F T T O N Y L L K E W I E N T E 370 D O N I A L C F I H A L V I F P H C 400  
UniRef90\_Q86UE4 E K G F K P S L S M D I K G M L S L Y E A S Y H G V E P S E S E D I L M D A S E A E A F F T T O N Y L L K E W I E N T E 370 D O N I A L C F I H A L V I F P H C 400  
UniRef90\_Q81027 N D G R F K E S L V R D F R G M L Q L L Y E A S Y H G V E P S E S E D I L M D A S E A E A F F T T O N Y L L K E W I E N T E 370 D O N I A L C F I H A L V I F P H C 400  
UniRef90\_Q9C6W6 N D G R F K E S L V R D F R G M L Q L L Y E A S Y H G V E P S E S E D I L M D A S E A E A F F T T O N Y L L K E W I E N T E 370 D O N I A L C F I H A L V I F P H C 400  
UniRef90\_A2YDV8 E K G G F F K P S S A K N F M D L L Y E A S Y H G V E P S E S E D I L M D A S E A E A F F T T O N Y L L K E W I E N T E 370 D O N I A L C F I H A L V I F P H C 400  
UniRef90\_Q49SP3 E D G R F K E S L A E D E A A H L G T P O G E V I D E A L A F A T R S R L L E I E S S A S H P H L R R R K L L D E I L D  
UniRef90\_UPI00004870C E D G R F K E S L A E D E A A H L G T P O G E V I D E A L A F A T R S R L L E I E S S A S H P H L R R R K L L D E I L D  
UniRef90\_A2X444 E G G F A F A N S P R D I T L Y E A S Y H G V E P S E S E D I L M D A S E A E A F F T T O N Y L L K E W I E N T E 370 D O N I A L C F I H A L V I F P H C 400  
UniRef90\_Q01L21 E K G G F R P D L V D D T Q G L L S L Y E A S Y H G V E P S E S E D I L M D A S E A E A F F T T O N Y L L K E W I E N T E 370 D O N I A L C F I H A L V I F P H C 400  
UniRef90\_Q5SBP0 E K G G F R P D L V D D T Q G L L S L Y E A S Y H G V E P S E S E D I L M D A S E A E A F F T T O N Y L L K E W I E N T E 370 D O N I A L C F I H A L V I F P H C 400  
UniRef90\_A2YRL9 N O G G F D D E S V M N N V G M L S L Y E A S Y H G V E P S E S E D I L M D A S E A E A F F T T O N Y L L K E W I E N T E 370 D O N I A L C F I H A L V I F P H C 400  
UniRef90\_Q5SBP9 E K G G F R P D L V D D T Q G L L S L Y E A S Y H G V E P S E S E D I L M D A S E A E A F F T T O N Y L L K E W I E N T E 370 D O N I A L C F I H A L V I F P H C 400  
UniRef90\_A0ERE2 E K G G F R P D L V D D T Q G L L S L Y E A S Y H G V E P S E S E D I L M D A S E A E A F F T T O N Y L L K E W I E N T E 370 D O N I A L C F I H A L V I F P H C 400  
UniRef90\_Q49SP4 H D G F F E E S L S G D K D V G G M W S L L Y E A S Y H G V E P S E S E D I L M D A S E A E A F F T T O N Y L L K E W I E N T E 370 D O N I A L C F I H A L V I F P H C 400  
UniRef90\_Q84NE5 K A G D F E E S L S G D K D V G G M W S L L Y E A S Y H G V E P S E S E D I L M D A S E A E A F F T T O N Y L L K E W I E N T E 370 D O N I A L C F I H A L V I F P H C 400  
UniRef90\_Q8SPN1 K D G G F F K A L Y S N H G L L S L Y E A S Y H G V E P S E S E D I L M D A S E A E A F F T T O N Y L L K E W I E N T E 370 D O N I A L C F I H A L V I F P H C 400  
UniRef90\_Q6YV71 T T T G T F D E V T K D V G G M W S L L Y E A S Y H G V E P S E S E D I L M D A S E A E A F F T T O N Y L L K E W I E N T E 370 D O N I A L C F I H A L V I F P H C 400  
UniRef90\_Q5SBP1 E G G S D F S A N L A D D K G M L S L Y E A S Y H G V E P S E S E D I L M D A S E A E A F F T T O N Y L L K E W I E N T E 370 D O N I A L C F I H A L V I F P H C 400  
UniRef90\_Q86NG3 S D G F K E S L T S D V K G M L S L Y E A S Y H G V E P S E S E D I L M D A S E A E A F F T T O N Y L L K E W I E N T E 370 D O N I A L C F I H A L V I F P H C 400  
UniRef90\_Q49SP3 G K G S F K E S L V R D F R G M L Q L L Y E A S Y H G V E P S E S E D I L M D A S E A E A F F T T O N Y L L K E W I E N T E 370 D O N I A L C F I H A L V I F P H C 400  
UniRef90\_Q2XSC4 D D G S F F A W V V I D V S V L S L Y E A S Y H G V E P S E S E D I L M D A S E A E A F F T T O N Y L L K E W I E N T E 370 D O N I A L C F I H A L V I F P H C 400  
UniRef90\_Q84U09 D D G S F F A W V V I D V S V L S L Y E A S Y H G V E P S E S E D I L M D A S E A E A F F T T O N Y L L K E W I E N T E 370 D O N I A L C F I H A L V I F P H C 400  
UniRef90\_Q9AR04 D D G S F F A W V V I D V S V L S L Y E A S Y H G V E P S E S E D I L M D A S E A E A F F T T O N Y L L K E W I E N T E 370 D O N I A L C F I H A L V I F P H C 400  
UniRef90\_A0ERE1 D E G E F F P L N D N T K G L L S L Y E A S Y H G V E P S E S E D I L M D A S E A E A F F T T O N Y L L K E W I E N T E 370 D O N I A L C F I H A L V I F P H C 400  
UniRef90\_Q84U01 K K E G F N K N D V O E L L E L L Y E A S Y H G V E P S E S E D I L M D A S E A E A F F T T O N Y L L K E W I E N T E 370 D O N I A L C F I H A L V I F P H C 400  
UniRef90\_Q2M4M3 E P R Q L I K N T V R G M L S L Y E A S Y H G V E P S E S E D I L M D A S E A E A F F T T O N Y L L K E W I E N T E 370 D O N I A L C F I H A L V I F P H C 400  
UniRef90\_Q01KN7 D G G F F M N G I A K E P R Q L I K N T V R G M L S L Y E A S Y H G V E P S E S E D I L M D A S E A E A F F T T O N Y L L K E W I E N T E 370 D O N I A L C F I H A L V I F P H C 400  
UniRef90\_Q0VHD6 D N E G F F S I S L N G D K K G L L S L Y E A S Y H G V E P S E S E D I L M D A S E A E A F F T T O N Y L L K E W I E N T E 370 D O N I A L C F I H A L V I F P H C 400  
UniRef90\_AZ2S9 E K G G F F S I S L N G D K K G L L S L Y E A S Y H G V E P S E S E D I L M D A S E A E A F F T T O N Y L L K E W I E N T E 370 D O N I A L C F I H A L V I F P H C 400  
UniRef90\_UPI0000162AD9 S E N G F F K E S L T R D A R G M L S L Y E A S Y H G V E P S E S E D I L M D A S E A E A F F T T O N Y L L K E W I E N T E 370 D O N I A L C F I H A L V I F P H C 400  
UniRef90\_Q5G4S4 E O G G F G F T A N S A R A D V E S L Y E A S Y H G V E P S E S E D I L M D A S E A E A F F T T O N Y L L K E W I E N T E 370 D O N I A L C F I H A L V I F P H C 400  
UniRef90\_Q01E23 S E N G F F K E S L T R D A R G M L S L Y E A S Y H G V E P S E S E D I L M D A S E A E A F F T T O N Y L L K E W I E N T E 370 D O N I A L C F I H A L V I F P H C 400  
UniRef90\_Q29VN3 E D G G F F S S D I A D D P K G L L S L Y E A S Y H G V E P S E S E D I L M D A S E A E A F F T T O N Y L L K E W I E N T E 370 D O N I A L C F I H A L V I F P H C 400  
UniRef90\_Q94J38 D E G K F K E S L I N D P R G M L S L Y E A S Y H G V E P S E S E D I L M D A S E A E A F F T T O N Y L L K E W I E N T E 370 D O N I A L C F I H A L V I F P H C 400  
UniRef90\_Q0J834 E N G F N T R D D N N G T R S E L L S L Y E A S Y H G V E P S E S E D I L M D A S E A E A F F T T O N Y L L K E W I E N T E 370 D O N I A L C F I H A L V I F P H C 400  
UniRef90\_Q66PX9 K K S O S F N A N L A Q D T K G M L S L Y E A S Y H G V E P S E S E D I L M D A S E A E A F F T T O N Y L L K E W I E N T E 370 D O N I A L C F I H A L V I F P H C 400  
UniRef90\_Q81193 D D G R F V A N L A Q D T K G M L S L Y E A S Y H G V E P S E S E D I L M D A S E A E A F F T T O N Y L L K E W I E N T E 370 D O N I A L C F I H A L V I F P H C 400  
UniRef90\_Q0JE19 E G G F F V A N L A Q D T K G M L S L Y E A S Y H G V E P S E S E D I L M D A S E A E A F F T T O N Y L L K E W I E N T E 370 D O N I A L C F I H A L V I F P H C 400  
UniRef90\_Q2NM14 E G G F F V A N L A Q D T K G M L S L Y E A S Y H G V E P S E S E D I L M D A S E A E A F F T T O N Y L L K E W I E N T E 370 D O N I A L C F I H A L V I F P H C 400  
UniRef90\_Q01LN7 D H G T F N E T S L A D D P R G M L S L Y E A S Y H G V E P S E S E D I L M D A S E A E A F F T T O N Y L L K E W I E N T E 370 D O N I A L C F I H A L V I F P H C 400  
UniRef90\_Q75WN1 K D G G F L C C T Q L E E E E I K S I N Q L F R A S L H L F H G P E L V E A I S F A R H H L K O V F O K S H L P L A G T E T S S N L S T H I R N A L S I S Q H W  
UniRef90\_Q9L1A1 E D G K F K E S L T E D A V R G M L S L Y E A S Y H G V E P S E S E D I L M D A S E A E A F F T T O N Y L L K E W I E N T E 370 D O N I A L C F I H A L V I F P H C 400  
UniRef90\_Q81VP7 N G K F K E S L T E D A V R G M L S L Y E A S Y H G V E P S E S E D I L M D A S E A E A F F T T O N Y L L K E W I E N T E 370 D O N I A L C F I H A L V I F P H C 400  
UniRef90\_Q01HA9 D D G K F F K E S L T E D A V R G M L S L Y E A S Y H G V E P S E S E D I L M D A S E A E A F F T T O N Y L L K E W I E N T E 370 D O N I A L C F I H A L V I F P H C 400  
UniRef90\_Q1PDD2 S S G F F K A S I L T S D V G V G L S L Y E A S Y H G V E P S E S E D I L M D A S E A E A F F T T O N Y L L K E W I E N T E 370 D O N I A L C F I H A L V I F P H C 400  
UniRef90\_Q6J069 E G G F A G A A A D T R S L S L Y E A S Y H G V E P S E S E D I L M D A S E A E A F F T T O N Y L L K E W I E N T E 370 D O N I A L C F I H A L V I F P H C 400  
UniRef90\_Q5GJ60 E L I G N F V E A D T R S L S L Y E A S Y H G V E P S E S E D I L M D A S E A E A F F T T O N Y L L K E W I E N T E 370 D O N I A L C F I H A L V I F P H C 400  
UniRef90\_Q60WJ1 E K G L E N R H F A H L K G M L S L Y E A S Y H G V E P S E S E D I L M D A S E A E A F F T T O N Y L L K E W I E N T E 370 D O N I A L C F I H A L V I F P H C 400  
UniRef90\_Q11TD0 V M D N K F S S N A K D F E L E A S H L G E D E I L D A K I F A K W L K D A F S Y S N I K I V V E R V V H A L E E L P S H W  
UniRef90\_Q7570 K G N L N G I C S D T N A L L A L Y E A A H L G T P N E E I L R E A Q V E T T T N Q L K R I V D O L E R A G A S S P H I L M R N R A L O M P P H Y  
UniRef90\_Q22680 E N E K F M E S I T S D V K G M L S L Y E A A H L G T P N E E I L R E A Q V E T T T N Q L K R I V D O L E R A G A S S P H I L M R N R A L O M P P H Y  
UniRef90\_Q5GJ59 E D G S F L I D G T N D P K G L S L Y E A A H L V T H D E T L E D A I A F A R O H L E A A R R O S L K S P L A E O V G R A L G T P H K  
UniRef90\_Q5SBP3 E R G G F D E S D T L G L S L Y E A S N L G V T G E E L L E A M E F F A E R L R R S S E R E S H O K G T P P H L A R H R N A L G L S H K  
UniRef90\_Q84UV0 K K G G K D V K N D V K G M L S L Y E A S N L G V T G E E L L E A M E F F A E R L R R S S E R E S H O K G T P P H L A R H R N A L G L S H K  
UniRef90\_Q65437 S N G S F K E S L I G D A K G M L S L Y E A A H L A T K O Y I L D E A L I F T S S H E L V A T I V V E R V V H A L E E L P S H W  
UniRef90\_Q65435 N D G N F K G G I S D A K G L L A L Y E A A O L R T T T E Y I M E A I S F F T S S N L E L A D G T P P H L A R H R N A L G L S H K  
UniRef90\_Q5GJ58 E G G S F A S T S T A D D T A L S L Y E A A Y L R K H G E A L D D A I A F A R R S Q S L E A G O G A T R S P M A K O V S R A L D T P H K  
UniRef90\_Q10L24 S T G F R E S T S T A D D T A L S L Y E A A Y L R K H G E A L D D A I A F A R R S Q S L E A G O G A T R S P M A K O V S R A L D T P H K  
UniRef90\_Q10L17 N R G S F R A L S S D T R G L S L Y E A A H M A M P G E A L D D A I A F A R R S Q S L E A G O G A T R S P M A K O V S R A L D T P H K  
UniRef90\_Q5SBP7 D D G G F F K E S L A E D A K D V G G M W S L L Y E A S Y H G V E P S E S E D I L M D A S E A E A F F T T O N Y L L K E W I E N T E 370 D O N I A L C F I H A L V I F P H C 400  
UniRef90\_Q32VM4 K D G K F K E S L A E D A K D V G G M W S L L Y E A S Y H G V E P S E S E D I L M D A S E A E A F F T T O N Y L L K E W I E N T E 370 D O N I A L C F I H A L V I F P H C 400  
UniRef90\_Q4U3F6 S S G F F E E D M T R D V R G M L S L Y E A S A O L R I V H G E I L D E A G A F A E S R L K K T I E K T L D G T L A O V K H R E R P N R  
UniRef90\_Q7XNLO D G D A R L S S V L A D R D V R G M L S L Y E A S A O L R I V H G E I L D E A G A F A E S R L K K T I E K T L D G T L A O V K H R E R P N R

Figure S3 (continued).

```

UniRef90_Q94G53      MVIPLRVIETSWFIIIVYPKKVG 420
UniRef90_Q84UJ6      NIIEVLVIAREYISYVEEQQEY
UniRef90_Q84KL2      NIPLRLVIAREYISYVEEQQEY
UniRef90_Q64U44      SVIPDWEARSFIIIVYGNHNSWLN
UniRef90_Q82UJ4      OMRRRLISTRWYIDVYGRKQNYK
UniRef90_A20E49      GVPRLRIETIYIISYVEEPPS
UniRef90_Q8W1J9      SIIPRLIEARWFLIDRYATR
UniRef90_Q2XSC5      RAORLIEARWFLIDAYARRP
UniRef90_Q8FVL2      SIIPRLIEARWFLIDRYATR
UniRef90_Q23516      SIIPRLIEARWFLIDRYATR
UniRef90_Q09HU5      RIORLIEARWFLIDAYATR
UniRef90_A20E52      RVIPRLIEARWFLIDRYATR
UniRef90_Q20HJ6      SVIPDWEARSFIIIVYGNHNSWLN
UniRef90_Q67SLO      SLPLRWEARSFIIIVYGNHNSWLN
UniRef90_Q8LH31      NMIEPLVIAREYISYVEEQQEY
UniRef90_Q81192      RIQSVIEARWFLIDAYARRP
UniRef90_Q96376      RMDRVIEENRIWLEIASSALWFGKSSYR
UniRef90_Q68CL8      AASRDIEVRYISYVEEQQEY
UniRef90_Q84UJ4      GITSRIETROYISYVEEQQEY
UniRef90_Q8EJ97      RLHLRIEARWFLIDRYATR
UniRef90_Q64405      SVIPDWEARSFIIIVYGNHNSWLN
UniRef90_Q27JK5      TIIVRVIAARKYISYVEEQQEY
UniRef90_P59287      GVPRLRIETIYIISYVEEPPS
UniRef90_Q50L36      RTQRRIEARSFIIIVYGNHNSWLN
UniRef90_A0R273      RMARLIEARWFLIDRYATR
UniRef90_Q0PC13      RMPRLIEARSFIIIVYGNHNSWLN
UniRef90_Q8GUE4      RLRIEALVIAREYISYVEEQQEY
UniRef90_Q8L027      TIIVRVIAARKYISYVEEQQEY
UniRef90_Q8C8W6      NIIEVLVIAREYISYVEEQQEY
UniRef90_A2YD8      RVIGLIEARWFLIDRYATR
UniRef90_Q49SP4      GMDQVIEARWFLIDRYATR
UniRef90_UPI00004870C  NLIEPLVIAREYISYVEEQQEY
UniRef90_A2X44      RVIRIIEARWFLIDRYATR
UniRef90_Q01121      TIIVRVIAARKYISYVEEQQEY
UniRef90_Q5SBP0      RQRLIEARWFLIDRYATR
UniRef90_A2YRL9      RVIRIIEARWFLIDRYATR
UniRef90_Q5SBP6      KMLRIEARWFLIDRYATR
UniRef90_A0ERE2      RVIORLIEARWFLIDRYATR
UniRef90_Q49SP4      GMDQVIEARWFLIDRYATR
UniRef90_Q892B4      RVPQRLIEARWFLIDRYATR
UniRef90_Q5SBP4      RVIGLIEARWFLIDRYATR
UniRef90_Q84NE5      KMLRIEARWFLIDRYATR
UniRef90_Q5SPN1      GMPVIEARWFLIDRYATR
UniRef90_Q6YN71      RIORLIEARWFLIDRYATR
UniRef90_Q5SBP1      TLVRLIEARWFLIDRYATR
UniRef90_Q49SP3      GLPRLIEARWFLIDRYATR
UniRef90_A0FB7      TMKRRIEARWFLIDRYATR
UniRef90_A2X2V2      NKRRIEARWFLIDRYATR
UniRef90_Q2XSC4      RVIGLIEARWFLIDRYATR
UniRef90_Q84UJ9      NLIEPLVIAREYISYVEEQQEY
UniRef90_Q5A9P4      SVIORPNSRWLIDAYARRP
UniRef90_Q84UJ1      RMRRRIEARWFLIDRYATR
UniRef90_Q2MM43      RPLRIEALVIAREYISYVEEQQEY
UniRef90_Q01KN7      TSKRTETIHYLSEYGOEIGHMS
UniRef90_Q0VHD6      RVIKLIEARWFLIDRYATR
UniRef90_A2Z5N9      RARLIEARWFLIDRYATR
UniRef90_UPI0000162AD9  NMEMLVPIVFIPIVYVEEATR
UniRef90_Q5GAS4      RVIRIIEARWFLIDRYATR
UniRef90_Q0J223      TYKRVIEMLHYMIEYGOEAAE
UniRef90_Q29VN3      TLKRLIEARWFLIDRYATR
UniRef90_Q84J58      AAARLIEARWFLIDRYATR
UniRef90_Q03834      RPLRIEALVIAREYISYVEEQQEY
UniRef90_Q66PX9      NPLRLKARHHIIGLSEKPTR
UniRef90_Q81193      RVIGLIEARWFLIDRYATR
UniRef90_Q0E19      TYRRIEALVIAREYISYVEEQQEY
UniRef90_Q2NM14      RLRIEALVIAREYISYVEEQQEY
UniRef90_Q01LN7      THRRRIEARWFLIDRYATR
UniRef90_Q75W11      NPLRIEALVIAREYISYVEEQQEY
UniRef90_Q8L1A1      SLIEPLVIAREYISYVEEQQEY
UniRef90_Q8LV77      NMIEPLVIAREYISYVEEQQEY
UniRef90_Q01H49      TYKRVIEMLHYMIEYGOEAAE
UniRef90_Q1PDD2      GMPRLGTRQYISYVEEQQEY
UniRef90_Q6J069      RVIGLIEARWFLIDRYATR
UniRef90_Q5GJ60      RVIGLIEARWFLIDRYATR
UniRef90_Q60WJ1      RVIOVDFIKWQIINAYEKDLCRV
UniRef90_Q1T1D0      RVIPWFDLKHVYKQYQANK
UniRef90_Q75170      NMKRRIEARWFLIDRYATR
UniRef90_Q2980      NAEMLVPIVFIPIVYVEEATR
UniRef90_Q5GJ59      TLKRLIEARWFLIDRYATR
UniRef90_Q5SSP3      RMARLIEARWFLIDRYATR
UniRef90_Q84UJ0      TVIRGLTSSKRFIIIVYGNHNSWLN
UniRef90_Q65437      NFEEQVISAHPIVYGNHNSWLN
UniRef90_Q65435      QMEVLVIAREYISYVEEQQEY
UniRef90_Q5GJ58      RVIGLIEARWFLIDRYATR
UniRef90_Q10L24      APKRLIETIHYIISYVEEPPS
UniRef90_Q10L17      APKRLIETIHYIISYVEEPPS
UniRef90_Q5SBP7      AAILRLGAEARFIIIVYGNHNSWLN
UniRef90_Q8ZVM4      GITSRIETROYISYVEEPPS
UniRef90_Q4U3FE      GORVIEARWFLIDRYATR
UniRef90_Q7XNL0      TCKRIEALVIAREYISYVEEPPS

```

Figure S3 (continued).







UniRef90\_Q94G53  
UniRef90\_Q84UU6  
UniRef90\_Q84KL2  
UniRef90\_Q64404  
UniRef90\_Q9ZUH4  
UniRef90\_A2Q649  
UniRef90\_Q8W1J9  
UniRef90\_Q2XSC5  
UniRef90\_Q9FVL2  
UniRef90\_Q23516  
UniRef90\_Q09HU5  
UniRef90\_A2Q652  
UniRef90\_Q20HU6  
UniRef90\_Q675L0  
UniRef90\_Q9LH31  
UniRef90\_Q81192  
UniRef90\_Q96376  
UniRef90\_Q68CL9  
UniRef90\_Q84UU4  
UniRef90\_Q6EJ97  
UniRef90\_Q64405  
UniRef90\_Q2TJK5  
UniRef90\_P59287  
UniRef90\_Q50L36  
UniRef90\_A0RZ13  
UniRef90\_Q0PC13  
UniRef90\_Q8GUE4  
UniRef90\_Q9LQ27  
UniRef90\_Q9C6W6  
UniRef90\_A2YDV8  
UniRef90\_Q49SP6  
UniRef90\_LP100004870C  
UniRef90\_A2X414  
UniRef90\_Q01L21  
UniRef90\_Q5SBP0  
UniRef90\_A2YRL9  
UniRef90\_Q5SBP6  
UniRef90\_A0ERE2  
UniRef90\_Q49SP4  
UniRef90\_Q8H2B4  
UniRef90\_Q5SBP4  
UniRef90\_Q84NE5  
UniRef90\_Q9SPN1  
UniRef90\_Q6YN71  
UniRef90\_Q5SBP1  
UniRef90\_Q66NG3  
UniRef90\_Q49SP3  
UniRef90\_A0F0B7  
UniRef90\_A2XGN2  
UniRef90\_Q2XSC4  
UniRef90\_Q84UU9  
UniRef90\_Q9AR04  
UniRef90\_A0ERE1  
UniRef90\_Q84UV1  
UniRef90\_Q2M4M3  
UniRef90\_Q01KN7  
UniRef90\_Q0VHD6  
UniRef90\_A2ZSN9  
UniRef90\_LP10000162AD9  
UniRef90\_Q5GAS4  
UniRef90\_Q0JE23  
UniRef90\_Q29VN3  
UniRef90\_Q94JS8  
UniRef90\_Q0J834  
UniRef90\_Q66PX9  
UniRef90\_Q81193  
UniRef90\_Q0JE19  
UniRef90\_Q2NM14  
UniRef90\_Q01LN7  
UniRef90\_Q75WN1  
UniRef90\_Q9LIA1  
UniRef90\_Q9LVP7  
UniRef90\_Q01HA9  
UniRef90\_Q1PDD2  
UniRef90\_Q6JD69  
UniRef90\_Q5GJ60  
UniRef90\_Q6QWJ1  
UniRef90\_Q1T1D0  
UniRef90\_Q75170  
UniRef90\_Q22680  
UniRef90\_Q5GJ59  
UniRef90\_Q5SBP3  
UniRef90\_Q84UV0  
UniRef90\_Q65437  
UniRef90\_Q65435  
UniRef90\_Q5GJ58  
UniRef90\_Q10L24  
UniRef90\_Q10L17  
UniRef90\_Q5SBP7  
UniRef90\_Q9ZVM4  
UniRef90\_Q4U3F6  
UniRef90\_Q7XNL0

730 740 750

```

T N L P R M G H F M Y T D E G D G K Y G K E D P M F K P Y V F S L F V N P I
L N F A R L I F D V M Y K Y R D D G Y G S D A P K T E V K N L V K R T L V H E P V
F D I C R I I F H H G Y Q E K Y R D D G Y G S D A P K T E V K N L V K R T L V H E P V
T N L A R M S Q C M Y Q E K Y R D D G Y G S D A P K T E V K N L V K R T L V H E P V
M N V A R V I T E F A Y E N E D K Y T K P E E L L K Q Q W I V S M L F E P P Y A
UniRef90_Q8W1J9 R N L G R A A Q F M Y F D D G D G N H S Q L H Q R I A C L L F E P P Y A
UniRef90_Q2XSC5 A N L G R A A Q F M Y F D D G D G N Q S S L L Q Q W I V S M L F E P P Y A
UniRef90_Q9FVL2 L N L A R I T I D V T Y K H N D D G Y T H P P E K T K T V D Y I Q S V L F N P V
UniRef90_Q23516 A N L G R A A Q F M Y F D D G D G H G V Q D H S K I T H Q Q M G G L M F P V
UniRef90_Q09HU5 L N F A R G T H F I Y E D E D K Y T P D L L K D D Y I A A L L V D D Q P S
UniRef90_A2Q652 F N I V R G L Q F V Y K Y R D D G Y G S D A P K T E V K N L V K R T L V H E P V
UniRef90_Q20HU6 F N V A R G L R L I Y K Y R D D G Y G S D A P K T E V K N L V K R T L V H E P V
UniRef90_Q675L0 L N L A R I T I D V T Y K H N D D G Y T H P P E K T K T V D Y I Q S V L F N P V
UniRef90_Q9LH31 A N L G R V A Q F I Y K H G D G F G V Q H S K T Y E H L I A G L L F E P Y A
UniRef90_Q81192 F S C L K V F N M F F N
UniRef90_Q96376
UniRef90_Q68CL9
UniRef90_Q84UU4
UniRef90_Q6EJ97
UniRef90_Q64405
UniRef90_Q2TJK5
UniRef90_P59287
UniRef90_Q50L36
UniRef90_A0RZ13
UniRef90_Q0PC13
UniRef90_Q8GUE4
UniRef90_Q9LQ27
UniRef90_Q9C6W6
UniRef90_A2YDV8
UniRef90_Q49SP6
UniRef90_LP100004870C
UniRef90_A2X414
UniRef90_Q01L21
UniRef90_Q5SBP0
UniRef90_A2YRL9
UniRef90_Q5SBP6
UniRef90_A0ERE2
UniRef90_Q49SP4
UniRef90_Q8H2B4
UniRef90_Q5SBP4
UniRef90_Q84NE5
UniRef90_Q9SPN1
UniRef90_Q6YN71
UniRef90_Q5SBP1
UniRef90_Q66NG3
UniRef90_Q49SP3
UniRef90_A0F0B7
UniRef90_A2XGN2
UniRef90_Q2XSC4
UniRef90_Q84UU9
UniRef90_Q9AR04
UniRef90_A0ERE1
UniRef90_Q84UV1
UniRef90_Q2M4M3
UniRef90_Q01KN7
UniRef90_Q0VHD6
UniRef90_A2ZSN9
UniRef90_LP10000162AD9
UniRef90_Q5GAS4
UniRef90_Q0JE23
UniRef90_Q29VN3
UniRef90_Q94JS8
UniRef90_Q0J834
UniRef90_Q66PX9
UniRef90_Q81193
UniRef90_Q0JE19
UniRef90_Q2NM14
UniRef90_Q01LN7
UniRef90_Q75WN1
UniRef90_Q9LIA1
UniRef90_Q9LVP7
UniRef90_Q01HA9
UniRef90_Q1PDD2
UniRef90_Q6JD69
UniRef90_Q5GJ60
UniRef90_Q6QWJ1
UniRef90_Q1T1D0
UniRef90_Q75170
UniRef90_Q22680
UniRef90_Q5GJ59
UniRef90_Q5SBP3
UniRef90_Q84UV0
UniRef90_Q65437
UniRef90_Q65435
UniRef90_Q5GJ58
UniRef90_Q10L24
UniRef90_Q10L17
UniRef90_Q5SBP7
UniRef90_Q9ZVM4
UniRef90_Q4U3F6
UniRef90_Q7XNL0

```

Figure S3 (continued).



UniRef90\_Q9LS76  
 UniRef90\_Q01KU6  
 UniRef90\_A3AHW2  
 UniRef90\_Q9C8E3  
 UniRef90\_Q10L25  
 UniRef90\_Q6ZCP0  
 UniRef90\_Q10L27  
 UniRef90\_A2Y215  
 UniRef90\_Q5UB06  
 UniRef90\_Q49SP7  
 UniRef90\_A2ZV57  
 UniRef90\_Q9C748  
 UniRef90\_A2XGY4  
 UniRef90\_Q84NC9  
 UniRef90\_Q5W283  
 UniRef90\_Q9F127  
 UniRef90\_Q0U750  
 UniRef90\_Q5SBP5  
 UniRef90\_A3A876  
 UniRef90\_A3AS12  
 UniRef90\_Q6ZH94  
 UniRef90\_Q65Y14  
 UniRef90\_Q29V2  
 UniRef90\_Q1SIE9  
 UniRef90\_Q7XNT3  
 UniRef90\_Q4KSH9  
 UniRef90\_Q9TJ9  
 UniRef90\_Q1SMG8  
 UniRef90\_A3AS12  
 UniRef90\_Q2184  
 UniRef90\_Q84ZV8  
 UniRef90\_A2X696  
 UniRef90\_Q9C749  
 UniRef90\_Q0IWT3  
 UniRef90\_A3AHW3  
 UniRef90\_Q9LR09  
 UniRef90\_A1D1K6  
 UniRef90\_Q7XLE2  
 UniRef90\_Q68V14  
 UniRef90\_Q13284  
 UniRef90\_Q5BCV6  
 UniRef90\_Q8F5E5  
 UniRef90\_UP1000021ADD4  
 UniRef90\_A2RA08  
 UniRef90\_Q4WWB3  
 UniRef90\_UP10000219AC9  
 UniRef90\_Q7S1N5  
 UniRef90\_Q2GRK4  
 UniRef90\_Q2JIF6  
 UniRef90\_Q5B878  
 UniRef90\_A2QWS7  
 UniRef90\_A0UKP0

1 10 20 30 40 50 60 70 80

WVLAQVLDK D I N G S E T P Q F P S S L K W I A N N Q I A D G S W G D S S I F L V Y D R V I N

Q A C Q L V I O Q I R T K D G E I G F M S P A V Y D T A W V S M V K K T T P E G Q W L L P E Q F E Y L R T Q I E D G G W E T Y A Q D D G I L L N

E E E A R A L V R K V G N A V D P I G F S T T S Q I I V D T A W A A M I S K E F G D K V W L F P S S F H Y L L K T O A A D G S W G Y P T T O T A G I L L D  
 Q A S Q L V Q I R T K D G E I G F M S A A V I V D T A W V S M V Q K T T P E G R W L L P K Q F F E Y I L R T Q I E D G S W E T Y A S D V I D G I L L N  
 Q A R S L L T R L V H N S D D V I G A F G L S S Q I I V D T A W L S L V K K V D G Q O R W L F P S S F F O V Y L L R N O Q D D G S W E A Y Q S E I D G I L L N  
 R A Q H L V T G I A K G Q O N G F G G F S S I L V D T A W L S M V I T K K D G V Q H W L F P S S F F O V Y L R Q Q G D G W G P Q V T L L D I T L L Q  
 A K G L T A R L S S I N D P K A F S T A S S I I V D T A W I A M V I T K P T G S V W A F P A A F O A I L O E Q S P G S W G S T S E L L D V S  
 Q S Q I D S L I S F I A S H Q S K G L G T S S A I V D T A W L S M I Q K P A N S S H F L P Q G F T Y L L R Q L P S G G W T S Y A T P V D G I L L N  
 T Y I S E I L S Q S P D K L K R Q G F T F S A S I I V D T A W L S M I N R R E N Q I L W L F P Q G F D V L L S Q L L D G A W S P S P A S T V D G I L L N  
 A D A L L V S E L R R L V T G L P D R T A A S V Y E T A L L V L O V P A I G D R R R R V Q S F F E Y L L Q T I D G W G Y P E N I W I Q D G V I H

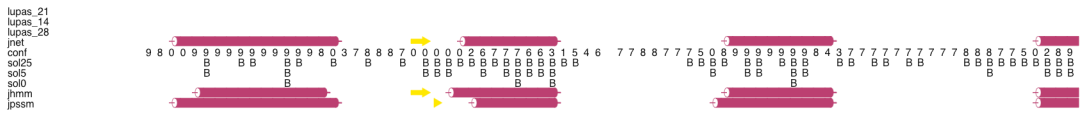

UniRef90\_Q9LS76  
 UniRef90\_Q01KU6  
 UniRef90\_A3AHW2  
 UniRef90\_Q9C8E3  
 UniRef90\_Q10L25  
 UniRef90\_Q6ZCP0  
 UniRef90\_Q10L27  
 UniRef90\_A2Y215  
 UniRef90\_Q5UB06  
 UniRef90\_Q49SP7  
 UniRef90\_A2ZV57  
 UniRef90\_Q9C748  
 UniRef90\_A2XGY4  
 UniRef90\_Q84NC9  
 UniRef90\_Q5W283  
 UniRef90\_Q9F127  
 UniRef90\_Q0U750  
 UniRef90\_Q5SBP5  
 UniRef90\_A3A876  
 UniRef90\_A3AS12  
 UniRef90\_Q6ZH94  
 UniRef90\_Q65Y14  
 UniRef90\_Q29V2  
 UniRef90\_Q1SIE9  
 UniRef90\_Q7XNT3  
 UniRef90\_Q4KSH9  
 UniRef90\_Q9TJ9  
 UniRef90\_Q1SMG8  
 UniRef90\_A3AS12  
 UniRef90\_Q2184  
 UniRef90\_Q84ZV8  
 UniRef90\_A2X696  
 UniRef90\_Q9C749  
 UniRef90\_Q0IWT3  
 UniRef90\_A3AHW3  
 UniRef90\_Q9LR09  
 UniRef90\_A1D1K6  
 UniRef90\_Q7XLE2  
 UniRef90\_Q68V14  
 UniRef90\_Q13284  
 UniRef90\_Q5BCV6  
 UniRef90\_Q8F5E5  
 UniRef90\_UP1000021ADD4  
 UniRef90\_A2RA08  
 UniRef90\_Q4WWB3  
 UniRef90\_UP10000219AC9  
 UniRef90\_Q7S1N5  
 UniRef90\_Q2GRK4  
 UniRef90\_Q2JIF6  
 UniRef90\_Q5B878  
 UniRef90\_A2QWS7  
 UniRef90\_A0UKP0

90 100 110 120 130 140 150 160

T I A C V A I K S W N V D S H K C E I G M S F R E N E N S I G D N A E H M P I G F E V A F T S I E E G K K I G D P F Y D S P I A A N Y A R R T K I K I

T A A S L L A L E I H R T D P E R I G R A R A A S R E I Q A W D V K D T V H V G F E M I P A L L R L R K K G H E F E F D G R A E I E R N R R K I K I

T A S A L L A L C H V Q E P Q I E H G V A S L K R Q L A V W N D V D D T N H I G V E L T I P A L L S M I E K E I D V P F F E F P C R D V I E R M H E E K I K I  
 T A A A L L A L R H V K N P L Q I O R G R A S L E E O L L A W D V D L D T N H I G V E M I P A L L R L L R E K G H E F E F E G R A E L D R I W R I K I  
 T A A S L L A E T H V I E M K E F I G R A R A A L S R Q L A W S V K D T V H V G F E I I L P A L L R L L R E K G H E F E F D G R A E L D R I W R I K I  
 T A A G L L V I K R Y R R D P I Q L D S H R L A T A S A L H S L E E W D V I T H V G F E I I V P T M L D L L V O E D P S I S F E K G R A E L T E I R E A K M  
 T A A S L L A L Q R H S V N P I Q L D V G E L C R V E L A R A A W N V S E T T H V G F E I I V P T L L R L L D E E G I S I S O F E P G K A T I M E I N A A K M  
 T M A G L L S L L A H R S P L S D N G A K L D S R I S R A E W D V A S T I Q V G S E V L V P L L Q L S L O D A K S E D P A G A G I R E M N A O K M  
 T L A A L L S L O K H E D L H S R I L K A K O F L O T A L K G L D R L L A C T L S V G E V R L P E L L D L L E L E G H T F N F D R T Y I T E I Q S K K L  
 T A A A L L A I K K H L K E I Q I R K G S S S R T O L Q N W D D V I S T N H I G V E I V A P A L L D L K O E D P A L D F F E P A G A G I R E M N A O K M  
 T A A G L I S I D N W L H S Q A S A L O S M L L H W V A T T D Q V G F E I L V I T S L O D A K S E D P A G A G I R E M N A O K M  
 T A A L L A I K K H L K E I Q I R K G S S S R T O L Q N W D D V I S T N H I G V E I V V S L L T L L E K E A G V S V D F P P G T I Q A L R D A K I  
 T L A A L L A L O R H A E D S R A A R O D D N S R I K A K A D L D G T D Q V G F E I V P G L L R O I S H G I T F K F C Q C R L E A L R A A K I  
 S A L C R H V R R S S H L P D D I L F R I F S A K S L R L D A K I Q K W P D D G I H F E L I V P V L L H L L R E E G V I T F Q F P A K R D D L S K Y T A A  
 S L A A L L A H R A G D R I D A G A F L R Q D P Y W S A T L D D I P V G L E L L W P R L Q A D A Q R A G L R F S L S P A L N A L G Q A R I A K I

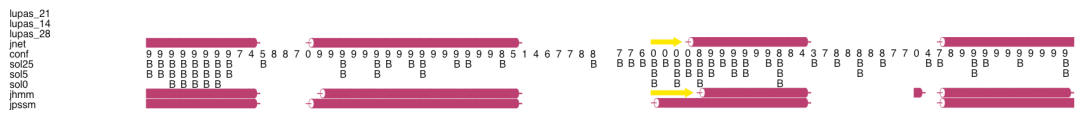

Figure S3 (continued).

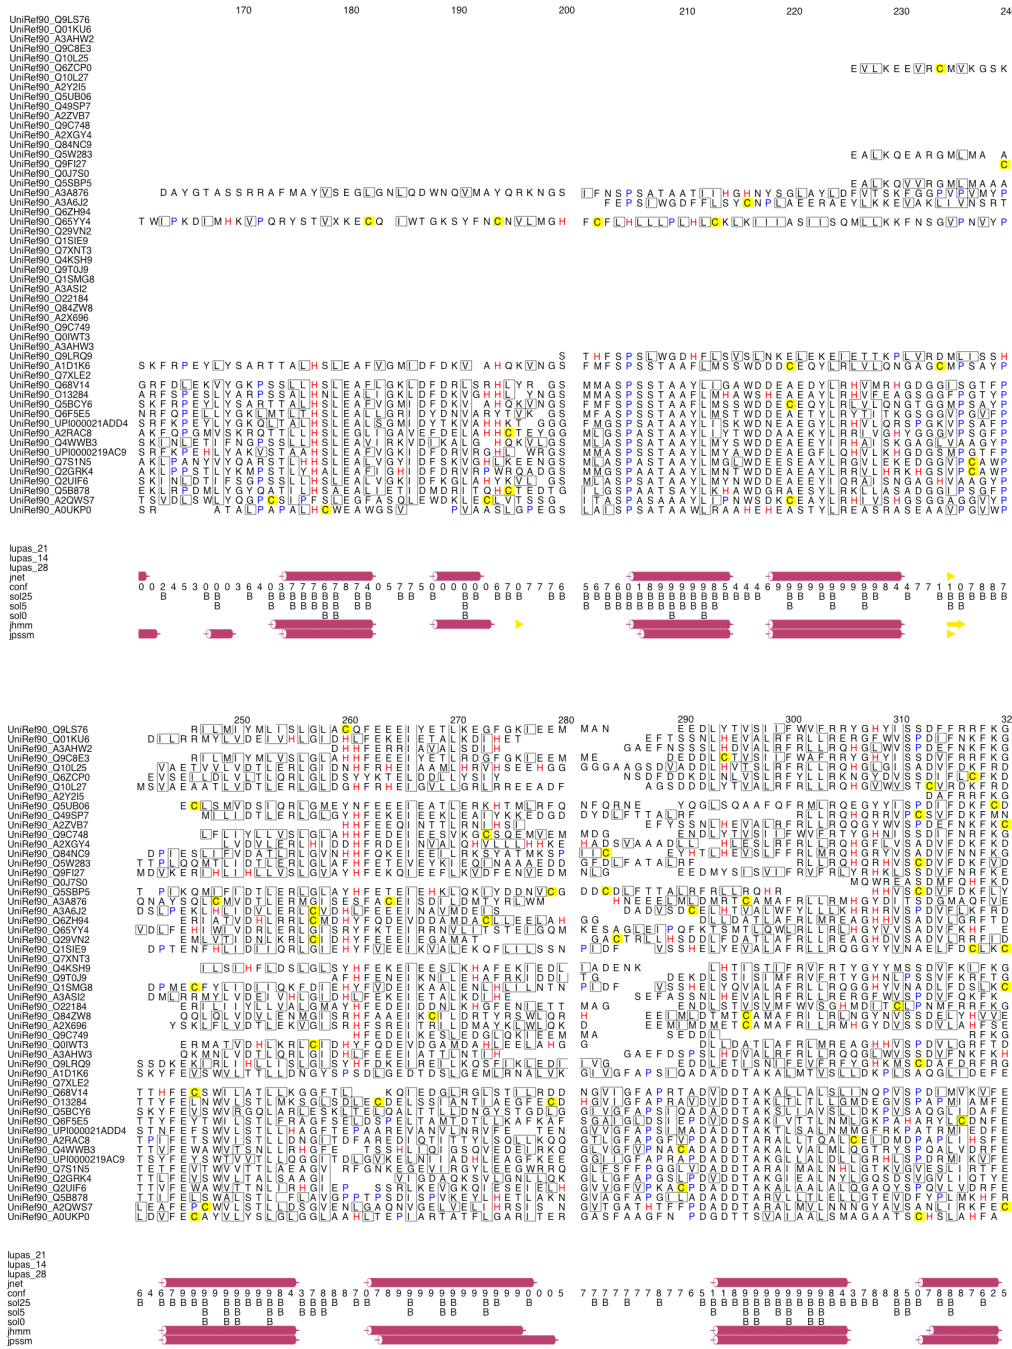

Figure S3 (continued).

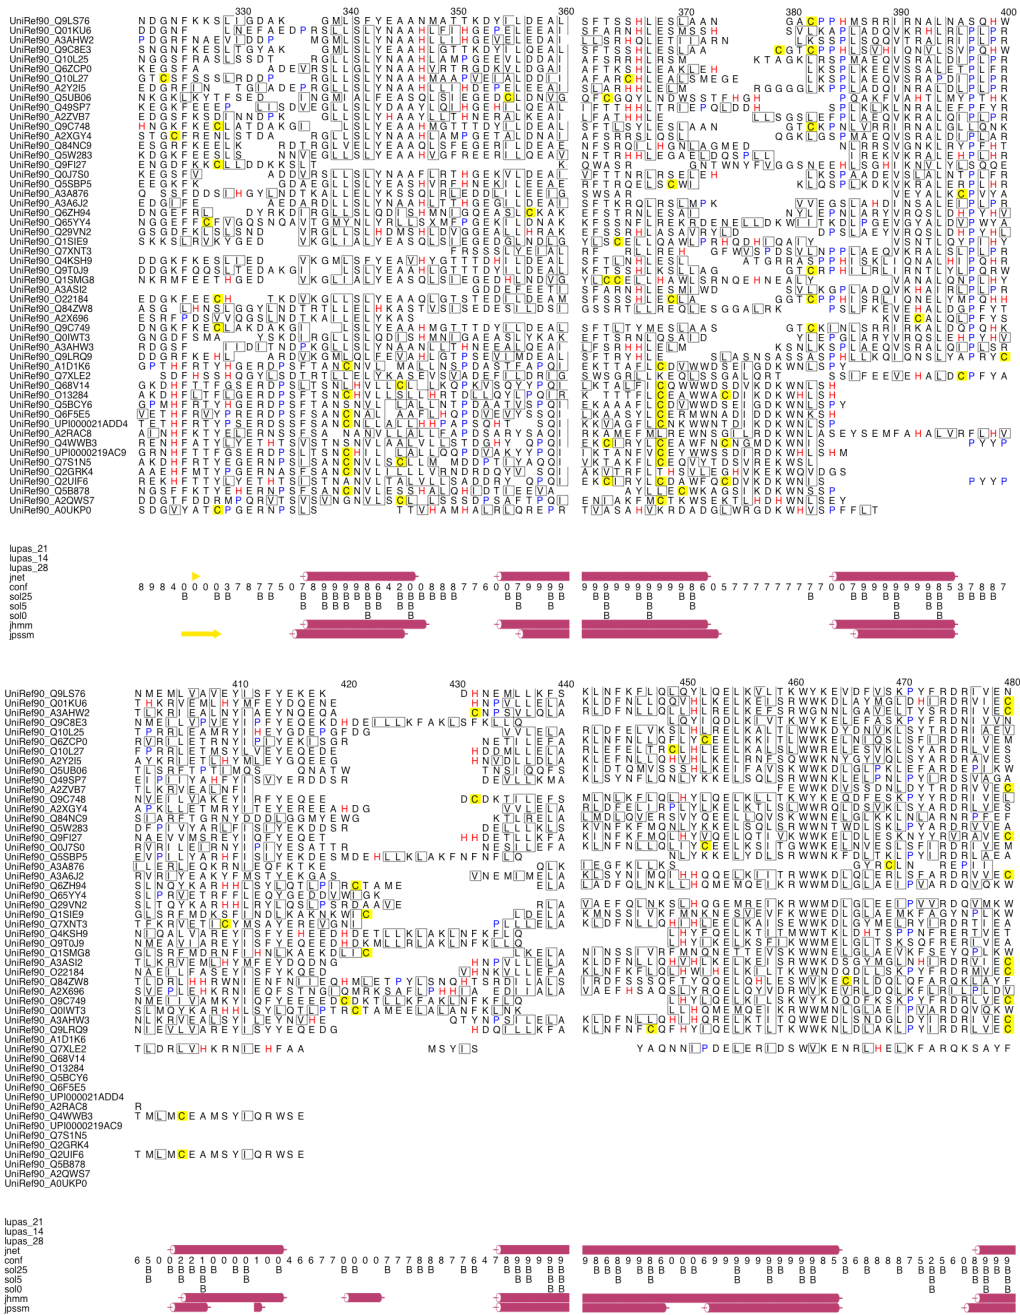

Figure S3 (continued).

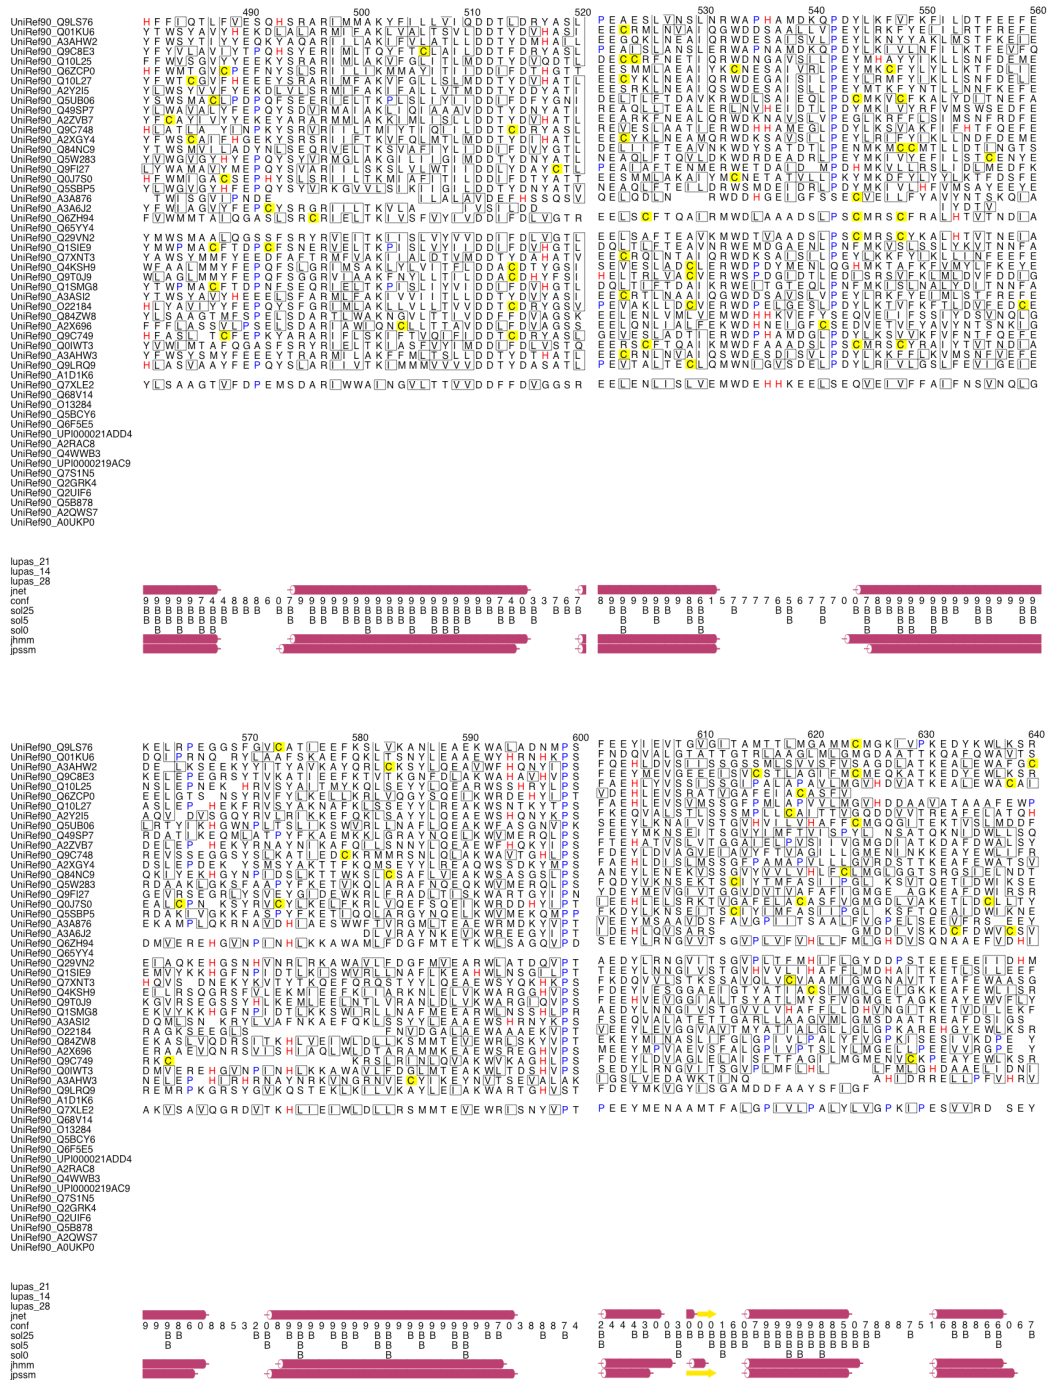

Figure S3 (continued).

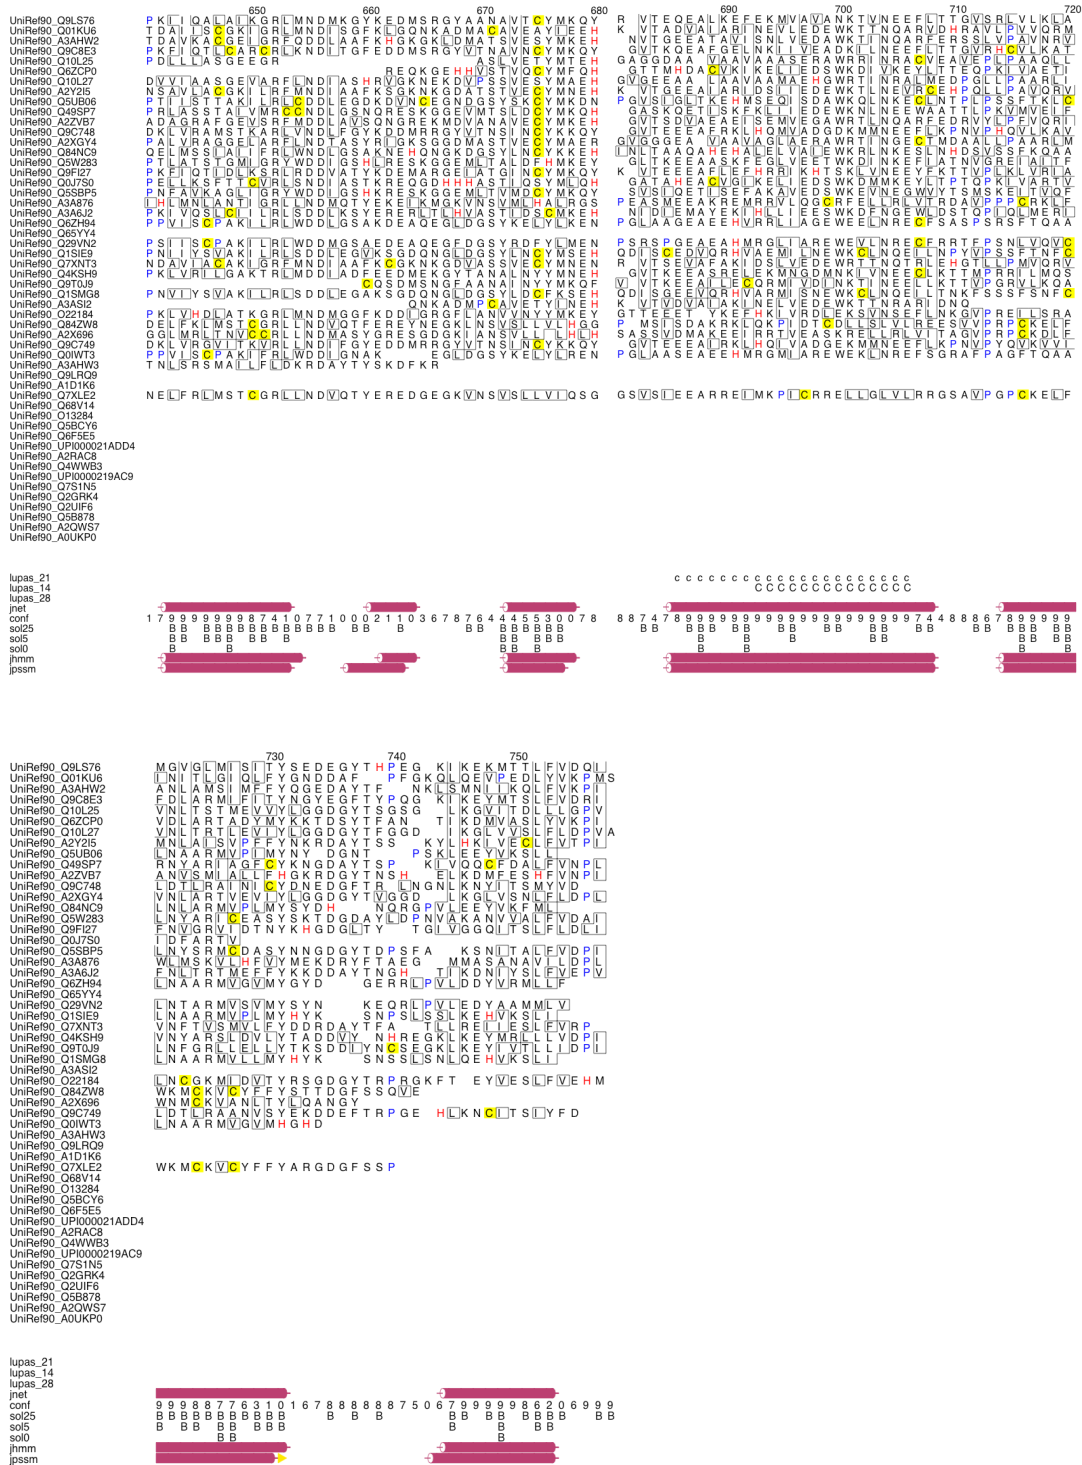

Figure S3 (continued).

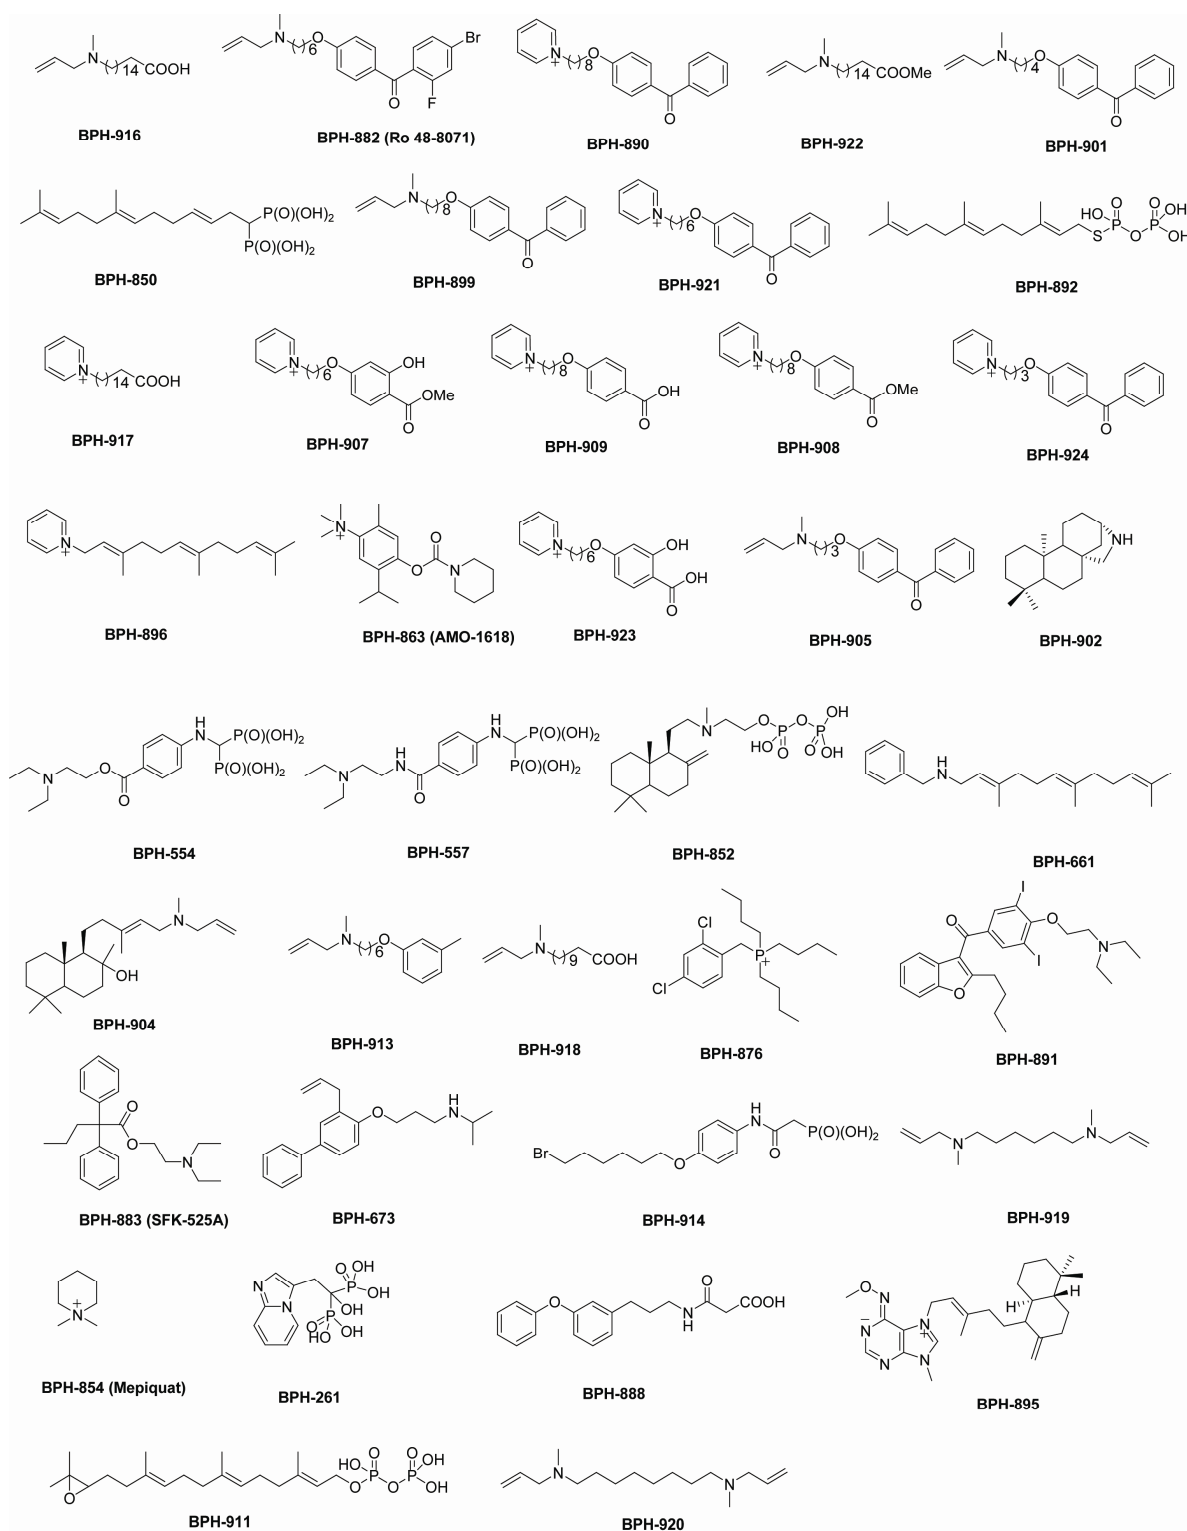

Figure S4: Structures of *Abies grandis* abietadiene synthase inhibitors investigated using GGPP as substrate. Structures are shown in order of decreasing potency (top left is the most potent).

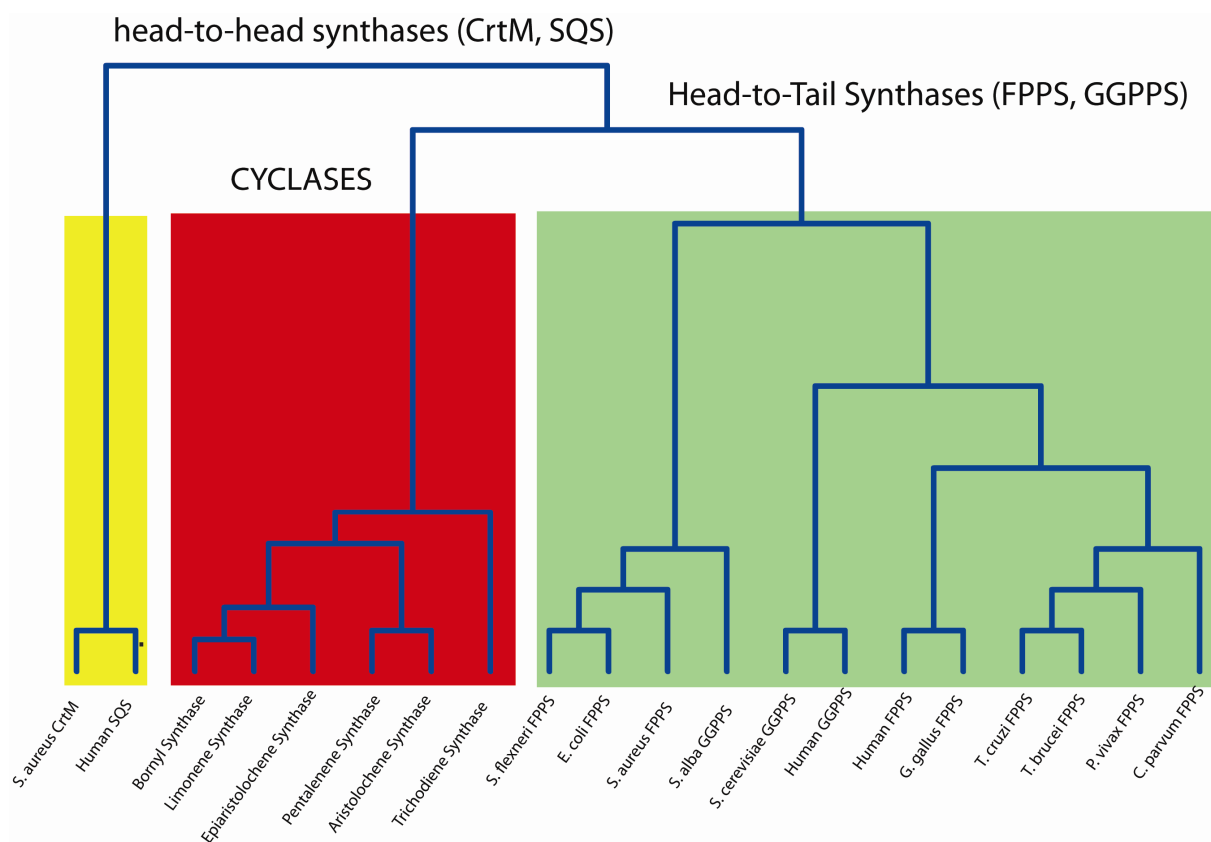

Figure S5: Structure dendrogram for  $\alpha$  and  $\alpha\beta$  proteins showing strong clustering of GGPPS/FPPS, separate from that seen with the monoterpene and sesquiterpene cyclases. This dendrogram was generated from the structural alignments obtained by using the Incremental Combinatorial Extension (CE) Program<sup>3</sup>.

Figure S6: JPRED3<sup>4</sup> output using *Bradyrhizobium japonicum* cyclase blr2149 as the query.

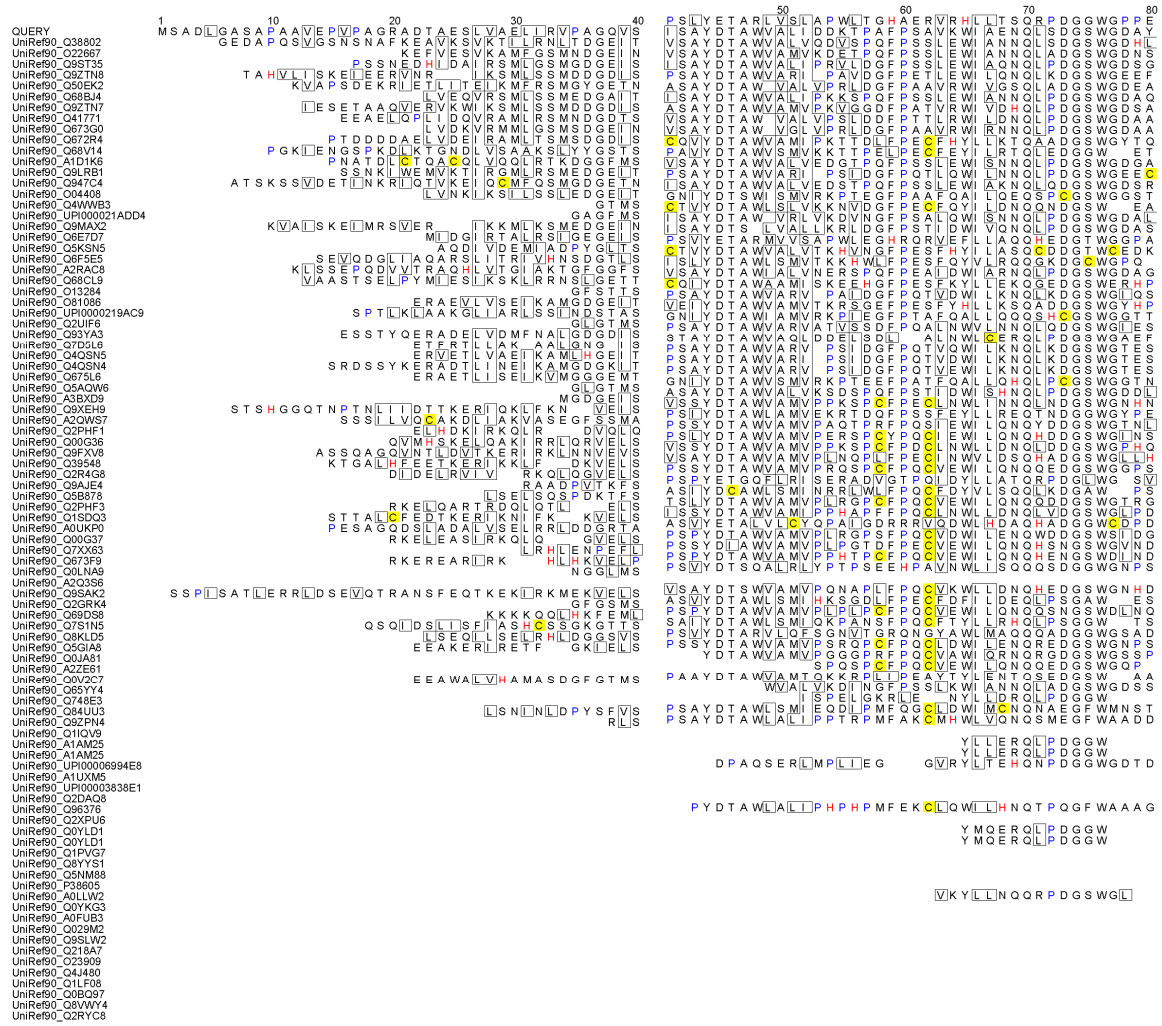



```

QUERY
UniRef90_Q38802
UniRef90_Q22867
UniRef90_Q8ST35
UniRef90_Q82TN8
UniRef90_Q29K42
UniRef90_Q88B44
UniRef90_Q82TN7
UniRef90_Q41771
UniRef90_Q673G0
UniRef90_Q672R4
UniRef90_Q68V14
UniRef90_A1D1K6
UniRef90_Q9LR81
UniRef90_Q947C4
UniRef90_Q04408
UniRef90_Q44WB3
UniRef90_UPI000021ADD4
UniRef90_Q9MA22
UniRef90_Q867D7
UniRef90_Q8SKN5
UniRef90_Q6F5E5
UniRef90_Q29AC8
UniRef90_Q68CL9
UniRef90_Q13284
UniRef90_Q91086
UniRef90_UPI0000219AC9
UniRef90_Q2UJF6
UniRef90_Q93YA3
UniRef90_Q7D5L6
UniRef90_Q4QSN5
UniRef90_Q4QSN4
UniRef90_Q675L6
UniRef90_Q5A0W6
UniRef90_A38XD9
UniRef90_Q9XEH9
UniRef90_Q2QW57
UniRef90_Q2PFP1
UniRef90_Q0Q3G8
UniRef90_Q673V8
UniRef90_Q39548
UniRef90_Q2R4G8
UniRef90_Q94JE7
UniRef90_Q58876
UniRef90_Q2PFP3
UniRef90_Q15DQ3
UniRef90_A0UKP0
UniRef90_Q0Q537
UniRef90_Q7XG63
UniRef90_Q673F9
UniRef90_Q0LN49
UniRef90_Q2Q3G6
UniRef90_Q98AK2
UniRef90_Q2GR44
UniRef90_Q68D58
UniRef90_Q791N5
UniRef90_Q84LD5
UniRef90_Q5GIA8
UniRef90_Q0JA81
UniRef90_Q2Z5E1
UniRef90_Q0V2C7
UniRef90_Q65Y74
UniRef90_Q748E3
UniRef90_Q84UJ3
UniRef90_Q32PN4
UniRef90_Q1QV9
UniRef90_A1AM25
UniRef90_A1AM25
UniRef90_UPI00006994E8
UniRef90_A1UXM5
UniRef90_UPI00003383E1
UniRef90_Q2D4O8
UniRef90_Q98376
UniRef90_Q2XPJ6
UniRef90_Q0YLD1
UniRef90_Q0YLD1
UniRef90_Q1PYG7
UniRef90_Q8YYS1
UniRef90_Q5NM88
UniRef90_Q386D5
UniRef90_A0LW2
UniRef90_Q0YKG3
UniRef90_A0YU3
UniRef90_Q029M2
UniRef90_Q9SLW2
UniRef90_Q218A7
UniRef90_Q23909
UniRef90_Q4480
UniRef90_Q11F08
UniRef90_Q0BC97
UniRef90_Q8WY4
UniRef90_Q2RYC8

```

D D V I T D C L L S T L A C V L A L K R W Q L A P D M I K G L E F V N R N R L V M K Q K P S D V W F T M F P A M L E L A G A S S L R V D F S E N L N  
P L Y A V D G N V N I S A S V K A L G H D K N A P H M V I R A R Q I L S V F T R I T L A P W H T A P A M P I E I V P L L Y A T Q P I G R L Q V N E G L T E  
P L Y A V D G N V N I S A S V K A L G H D K N A P H M V I R A R Q I L S V F T R I T L A P W H T A P A M P I E I V P L L Y A T Q P I G R L Q V N E G L T E

Y Y G D G G N L S T T E A Y F A L K A G E H E P M R R A R E F I L S F T K I W L A D W K K V P S M P V E L V L L P S L S W A R G T V V P L S I R C P L P A  
V P L M V L A A P R A V N R D D G L E D E L F

Figure S6 (continued).

QUERY  
UniRef90\_Q38802  
UniRef90\_Q22667  
UniRef90\_Q38T35  
UniRef90\_Q32T88  
UniRef90\_Q39EK2  
UniRef90\_Q68B14  
UniRef90\_Q32T87  
UniRef90\_Q41771  
UniRef90\_Q673G0  
UniRef90\_Q672F4  
UniRef90\_Q63V14  
UniRef90\_A1D1K6  
UniRef90\_Q3LR81  
UniRef90\_Q547C4  
UniRef90\_Q04408  
UniRef90\_Q4W8E3  
UniRef90\_UPI000021ADD4  
UniRef90\_Q6EMX2  
UniRef90\_Q6ETD7  
UniRef90\_Q5KSN5  
UniRef90\_Q6F5E5  
UniRef90\_Q2RAC8  
UniRef90\_Q68CL9  
UniRef90\_Q13284  
UniRef90\_Q31086  
UniRef90\_UPI000021AC9  
UniRef90\_Q2UIF6  
UniRef90\_Q39Y43  
UniRef90\_Q7D5L6  
UniRef90\_Q4Q3N5  
UniRef90\_Q4Q3N4  
UniRef90\_Q675L6  
UniRef90\_Q5ACW6  
UniRef90\_Q39X09  
UniRef90\_Q9XE19  
UniRef90\_Q2QW57  
UniRef90\_Q00G36  
UniRef90\_Q39XV8  
UniRef90\_Q39549  
UniRef90\_Q2R4G8  
UniRef90\_Q8AJE4  
UniRef90\_Q59B78  
UniRef90\_Q2PHF3  
UniRef90\_Q1SD02  
UniRef90\_A0UKP0  
UniRef90\_Q00G37  
UniRef90\_Q7XG63  
UniRef90\_Q673F9  
UniRef90\_Q0LN49  
UniRef90\_Q2Q3S6  
UniRef90\_Q9SAK2  
UniRef90\_Q2GRK4  
UniRef90\_Q69D38  
UniRef90\_Q7S1N5  
UniRef90\_Q8KLDS  
UniRef90\_Q5G1A8  
UniRef90\_Q0UJ481  
UniRef90\_A2ZE81  
UniRef90\_Q0Y2C7  
UniRef90\_Q6S9Y4  
UniRef90\_Q748E3  
UniRef90\_Q84UJ3  
UniRef90\_Q3ZPN4  
UniRef90\_Q1QV9  
UniRef90\_A1AM25  
UniRef90\_A1AM25  
UniRef90\_UPI00006994E8  
UniRef90\_A1UXM5  
UniRef90\_UPI00003838E1  
UniRef90\_Q2Q4C8  
UniRef90\_Q63V16  
UniRef90\_Q2XPU6  
UniRef90\_Q0YLD1  
UniRef90\_Q0YLD1  
UniRef90\_Q1PVG7  
UniRef90\_Q8Y51  
UniRef90\_Q5NM88  
UniRef90\_P38605  
UniRef90\_A0LLW2  
UniRef90\_Q0YK63  
UniRef90\_A0FUB3  
UniRef90\_Q029M2  
UniRef90\_Q9SLW2  
UniRef90\_Q21847  
UniRef90\_Q23909  
UniRef90\_Q4J480  
UniRef90\_Q1LF08  
UniRef90\_Q09C07  
UniRef90\_Q3WVY4  
UniRef90\_Q2RYC8

WR A A A R L R I P A G M D R R L A V H G L G A G A A L P E K L L H A L L E  
L K D I Y A K K E L K L T R I P K E M V L M H K V P T T L L H S L E  
L K E I Y A R R D I K L T K I I P M E V L M H K V P T T L L H S L E  
L Q D I Y A S R O L K L T R I P K D I L M H K V P T T L L H S L E  
R S Q I K L E T R I P K E L M H K V P T T L L H S L E  
L Q O I L E K R E A K L R I P K D I L M H K V P T T L L H S L E  
L K G I Y A N R E L K L K R I P K P D M M H K V P T T L L H S L E  
L Q O I N A R R R L K L A R I P K P D M M H K V P T T L L H S L E  
L O S I Y A N R E V K L R I P K P D M M H K V P T T L L H S L E  
L Q R I Y A N R E V K L R I P K P M E M M H K I P T S I L H S L E  
L O G I Y S R E L K M K R I P K E V M H T V P S I L H S L E  
R D V I Y R M E E K K R I P K E V Y G K P S S L L H S L E  
F E F G K D R A R E L N R I P K L S K F R P E Y L V S A R T I T A L L H S L E  
F E K L R K R K R F K L K I P R D I L M H K V P T T L L H S L E  
K R D E K L T R I P K E I L N V L H K V P T T L L H S L E  
T F N F D R T Y L T M E I N A A K M S R F K P E Y L V G K T O L I T A L L H S L E  
R N T K K K K I P K D I L M H K V P T T L L H S L E  
L K A T Y A E R E R K L K P R D V L M H K P T S L L H S L E  
R I L D L O A D T G T S G I R E L L R O N T G I L P E K T W S L I E  
L I K G R E A L T E R E A K M N R P O P E L L Y O G K L I M I L L H S L E  
L O D I Y A K R O L K L A K R E A H A R P T T L L H S L E  
H E F E S H L L M Q M Y K E M A R F S P E S L Y R A P S S A L L H S L E  
F P A O A G L R E M N A Q M S R F K P C H L Y E A K V S T A A H S L I E  
F D F D R T Y L N K S I S T A F E R I T D I V A A D N P A N L M A V I S  
D I L D I S K Y T A A S T S P D L S W L Y G P S S I L L H S L E  
E E S I L I G E L V I G R E O Q L R K L G S K I N K H I L L S V L  
S T P P K R O E R I A N L E R D A Y G A S S R R A F M A Y V I S  
I R L L D T R K R O E R I A N L E S M D K I H F G G I L L S V L  
I P D F E R R L T L K L S K K V S K I L N F D T I E S G P O S S I L L H S L E  
O T D F S I L M K R E L E O K R C H S N E I D G I Y A I L S E  
M O T D I D G I L I R K I E L E R D A Y G A S S R R A F M A Y V I S  
T D I D E L F H L R K I E L E R D S G G T I S A R K A F M A Y V I S  
V S I M V H E R E L L E L R R C H S N G R E A Y L A Y I A V I S  
V D A I L W K K E L L E L R R C H S N G R E A Y L A Y I A V I S  
M E T D I D S L F R L R E V E F E R D A G G T A S A R K A F M A Y V I S  
A S Q E D F P P G A N A E L W O L S D R I A R G O A K P T A W H T L L E  
E A L R A A K R P P G A N A E L W O L S D R I A R G O A K P T A W H T L L E  
O T D I V D R L R E L R E L E R E A G H S Y G R K A Y A M A V I T  
A I T O K R D R E L K R S F E A G S E G W K A Y L A Y I S  
I G G A R I L A K I S R A T A P A G H P A L A Y I S  
Q N D I D S L N H I R E M K T O R E A G H S Y G R K A Y A M A V I T  
I D Q I T H L R D M E L K R I A G D E S I G K E A Y F A Y I A E G L I E  
O T D I D G I L H O W E M L K R O A E E K S Y G R E A Y M A V I A E  
L R L N I P L P R E L I A L I G H K R K I V I Y S W E  
L K N F A A K R D E K K R P R E L M H K V P T T L L H S L E  
D M I R K R D L K O D S E K F S K L M H K V P T T L L H S L E  
R A L L R D A K L A K P P S T I Y K M P S T I Y H A L L E  
R V C H Q E T E L A K P P S T I Y K M P S T I Y H A L L E  
Q O A L H D A K L A K I L P A N Y I V Q P A R S T L L H S L I E  
D P D P N L V N M M L G E R L T R E A L K W E F E G N M A N V E F A  
D R D A G V I C H G G R T I T A Y I S  
Y R E F R S R E A L M S N T A K I L A R I C S A L S S K K T T L H S L I E  
K F E L L A A N Y A R R T K L I T W P K D I M H K  
L F S T D K R H L D G F Q G Y W R K N R L K R F N E F I S A L L H K  
S M K I Q O E L R E K I L V D G N Y P I L A Y L E V L P S K I Y  
V L D E L F E N R N T L L R E E L S D K T Q Y A P L M F L E  
L F S T D M L V H H D F R Y A W R K N R L K R T M H L V P G R I K R R  
L F S T D M L V H H D F R Y A W R K N R L K R T M H L V P G R I K R R  
O K F Y K L V K I P V V I Y A P A L V A L G O A R Y F H R P P N L M R G L  
R I L V I E L S Q N R D D I L T R E E V D E K K Q O Y S P L L L F L E  
R H L D K F R H H A W R K N V I A L D R V L K R T M H L V P G R I K O H  
L F H L D K F R H H A W R K N V I A L D R V L K R T M H L V P G R I K O H  
K S K E K E Y V P G S K H T H K I F F D R I A A F E R R P V P S I R N K  
L Q D P S K S K M P A K A P H Q S W A L F K F L A G O D A V L R T P K R L R D H  
A V Q A A E T W V D H Q E D S G D W G G Q P S V L A Y Y I G V P L D H E V T  
A I K A A V I S F V D E R I N G V D G L G A I F P A M A N S I M M Y P A D H P N R  
A V E K A K T W M I E R L H S D G L G A I Y P S V M A I L V I G A K D D P L P R  
A K L A V D F E E R L N G E D G L G A I Y P P M A N T I M M Y P E D H P P R  
A I R K A E A W F L P R M N G E D G L G A I F P P M V N Y L G Y P K D H P A R  
A L L O R A V I E W S E A R M N G E D G G I F P P M V I S Y L D Y P E D H P L R  
A V D F V R E R I N G E D G L G A I Y P A M A N S I M M Y S P D H P E A

Figure S6 (continued).







QUERY UniRef90\_Q38802 UniRef90\_Q22667 UniRef90\_Q95T35 UniRef90\_Q92TN8 UniRef90\_Q50EK2 UniRef90\_Q68BJ4 UniRef90\_Q92TN7 UniRef90\_Q41771 UniRef90\_Q673C0 UniRef90\_Q672R4 UniRef90\_Q66V14 UniRef90\_A1D1K6 UniRef90\_Q9LRE1 UniRef90\_Q947C4 UniRef90\_Q04408 UniRef90\_Q4WWB3 UniRef90\_UPI000021ADD4 UniRef90\_Q9NAK2 UniRef90\_Q6E7D7 UniRef90\_Q5KSN5 UniRef90\_Q6F5E5 UniRef90\_Q2RAC3 UniRef90\_Q68CL9 UniRef90\_Q13284 UniRef90\_Q81086 UniRef90\_UPI0000219AC9 UniRef90\_Q2LHF5 UniRef90\_Q93YA3 UniRef90\_Q7D5L6 UniRef90\_Q4G5N5 UniRef90\_Q4G5N4 UniRef90\_Q675L6 UniRef90\_Q5AQW6 UniRef90\_Q3BXD9 UniRef90\_Q9XEH9 UniRef90\_Q2QWS7 UniRef90\_Q2PHF1 UniRef90\_Q00G36 UniRef90\_Q9FXV8 UniRef90\_Q39548 UniRef90\_Q2R4G8 UniRef90\_Q9AJE4 UniRef90\_Q5B678 UniRef90\_Q2PHF3 UniRef90\_Q1SDQ3 UniRef90\_A0UKP0 UniRef90\_Q00G37 UniRef90\_Q7X263 UniRef90\_Q673F9 UniRef90\_Q0LNA9 UniRef90\_Q2Q3S6 UniRef90\_Q9S52 UniRef90\_Q2GRK4 UniRef90\_Q69DS8 UniRef90\_Q7S1N5 UniRef90\_Q9KLD5 UniRef90\_Q5GIA8 UniRef90\_Q0JA81 UniRef90\_Q2ZE61 UniRef90\_Q0V2C7 UniRef90\_Q85YY4 UniRef90\_Q748E3 UniRef90\_Q84UU3 UniRef90\_Q92FN4 UniRef90\_Q1IQV9 UniRef90\_A1AM25 UniRef90\_A1AM25 UniRef90\_UPI00008994E8 UniRef90\_A1UXM5 UniRef90\_UPI00003838E1 UniRef90\_Q2DAQ8 UniRef90\_Q96376 UniRef90\_Q2XPL6 UniRef90\_Q0YLD1 UniRef90\_Q0YLD1 UniRef90\_Q1PVG7 UniRef90\_Q8YYS1 UniRef90\_Q5NM88 UniRef90\_P38605 UniRef90\_A0LLW2 UniRef90\_Q0YK63 UniRef90\_A0FUB3 UniRef90\_Q029M2 UniRef90\_Q95LW2 UniRef90\_Q218A7 UniRef90\_Q23309 UniRef90\_Q4J480 UniRef90\_Q1LF08 UniRef90\_Q0BQ87 UniRef90\_Q8VWY4 UniRef90\_Q2RYC8

RGRAYLLETGTTAHDHPGPPWLWHDKDLYRPA MIVRAAVVAAR HLAGAAGPATA  
 490 500 510 520 530  
 RGVSWLKSCL H SQDLTWTSKTAYE VGFVAEAYKLAAL QASLEVPAA  
 RGRKFLQNS AGEKPEYLWVIEKVTYGS LLLSKSYVLAAL KVISERS  
 KGLEFIFLARSQRSPTDDOQLWLDKTLAYAIPTVSDSYIMAAV QA  
 RGEYLLQPKQSPSG DYLLWLEKVTYGS PVLISQVYRLLAAL KLSSSAPT S  
 AGRFISGHVIEDDRRNPPLWHDKDLYTPVVRVIRAEITLATO RAAEAEKEARA  
 RGITFL TTTIDKPPMEYLWSDKVISYGSAYLAEYVLAAR RAAESTS  
 KGRDYLAHTDDWTGDYLLWLEKVTYKLPITLAEYVLAAM KI  
 KAADVMQRWSCSDHDCD WTSKTAYRVDVIAAAYRLLAAM KASS  
 RGAHYLKTTRKVGHH DASWTSKSAYRVAIVIAEAYELAAAL NQKAT  
 RGVQFLTLTKGQRSQTDQDLWLDKTLAYALPTVSDSYIMAAAL QA  
 RAGGWL SQHCEPPYAPLWMAKTLAY SATVVKAAALLSAL RLVI  
 KGLQFLLSKQSRSQTDQDLWLDKTLFAPITVSDSYIVAAAV QA  
 R GKQFLLETWTMGQK PDRITWTGKVLHGHSYVHDAHVLAAL KINRA  
 RAKEFFTDESREN PPLWMGKDLYTFPRITVDVTVMCGR AVVCR  
 RGGYLLTDHQHP RREDYVWLEKVISYVSSFLRKVITYVLAAL HASRKQSPCS  
 KAFRLMRDCRSPRAQASMLWNKELSRPTRVVIRAVLELAAL WVVAHRRAEA  
 RGYNWLCIHYRPRMKEYQWLNKEIYCPQRITDRAYELLSAM LAIV  
 LGKAFLLNSNRDAWAKGRHLWLEKVTYSSPVLISE  
 SGKAFLEAHKHHDWKGOYLWIEKVTYASPVLLCEAYELAA WLAGRRIPPT  
 HALIEWMLARHEAHEPQTPLLWLGKELYCPTRVVIRVLELAAL  
 R GKAYLEENHRKEWREAEERLWLEKTVYGS PNLISQAYQLAAM KVV VPTT  
 RGVRYLLD HQNQWGTWE EKHFTGTGF  
 RGITAWLLENQKPNGS WWEKWLITGT  
 RGI EFLREEQEPFGGWFGRWGVIYIYGTWSV  
 RGI EFLREEQEPFGGWFGRWGVIYIYGTWSV  
 PAVGWLQRVIEGSSYFSKLLWYIYKLY PRVMTVTSLAAL QANASVPPA  
 RGV DYLLGTQREHGLWD  
 RGVN YLMRTQAGDGLW  
 RGITAWLQSIVIEDDGSW  
 RAARYLITNAQOMENGDFPQEEIMGVFNRRNMIYAAAYR  
 RGIAYLKKKEOEPPGGWFGRWGVIYIYGTWSV LLSGL HQAGE  
 RGIAYLKKKEOEPPGGWFGRWGVIYIYGTWSV LLSGL HQAGE  
 RGI DFLISTQKEDGSWD  
 RGINHLVSTQQPDGSW  
 KALLDVRSEOEAEAGWFGWGVIYIYGTGAVLPA LAAL  
 RAARYLITNAQOMENGDFPQEEIMGVFNRRNMIYAAAYR  
 RGIQYLRLRTQKR DGTWEEL  
 RGVQYL LATAQKSDGTWD  
 RGI DYLQREORDGLWD  
 HGLEYLLETQRSDGSWD  
 RA AKLLINSOENGDFFPQEEIMGVFNKNMIYAAAYR  
 RGVIEYLKSTQKGLWD  
 RA AVGLINSQLENGDFPQEEIMGVFNKNMIYAAAYR  
 RGIAYLLLAQOQTDGLW  
 RGAAYLLDAQNE DGFW  
 RGIAYLLQATQKPDGEWD  
 RA AKVLLINMQMENGEFPQEEIMGVFNKNMIIS  
 RGI RYLLLEAPRDGKWE EEELY

Figure S6 (continued).

UniRef90\_C6WQZ4  
UniRef90\_Q39RT6  
UniRef90\_Q0AFY0  
UniRef90\_Q029U6  
UniRef90\_P84466  
UniRef90\_A0W5P5  
UniRef90\_Q3X7Y9  
UniRef90\_Q3JBH8  
UniRef90\_P55348  
UniRef90\_Q8DQK6  
UniRef90\_Q6IWA7  
UniRef90\_Q59080  
UniRef90\_Q59080  
UniRef90\_LPI000038D45A  
UniRef90\_LPI000068B70A6  
UniRef90\_Q2Y5X6  
UniRef90\_Q07I43  
UniRef90\_Q07I43  
UniRef90\_A1AN91  
UniRef90\_Q8BLN5  
UniRef90\_A0JND6  
UniRef90\_A0L1S0  
UniRef90\_P33990  
UniRef90\_Q7NE23  
UniRef90\_P73914  
UniRef90\_Q4CA42  
UniRef90\_A1D8P1  
UniRef90\_A1D8P1  
UniRef90\_P48449  
UniRef90\_Q2U3C4  
UniRef90\_Q2RH04  
UniRef90\_Q74FC1  
UniRef90\_Q759C3  
UniRef90\_A1DR10  
UniRef90\_Q86WJ0  
UniRef90\_Q3A7M9  
UniRef90\_Q62TY2  
UniRef90\_Q10231  
UniRef90\_A0RCV5  
UniRef90\_F54924  
UniRef90\_A0KC81  
UniRef90\_C6N3F4  
UniRef90\_A0LVK9  
UniRef90\_Q35C98  
UniRef90\_Q116B5  
UniRef90\_Q2E5Y5  
UniRef90\_Q7UR25  
UniRef90\_Q69446  
UniRef90\_A1DRH9  
UniRef90\_A1HVC3  
UniRef90\_A1CP22  
UniRef90\_Q4WDN6  
UniRef90\_Q2JET5  
UniRef90\_A1DRH6  
UniRef90\_Q57ZG6  
UniRef90\_A1DRH2  
UniRef90\_LPI0000699273  
UniRef90\_Q2B3H0  
UniRef90\_A1D8P8

1 10 20 30 40 50 60 70 80

S N S **C** M E A E W **V** L A M H L G I D D D P K Y I R A I L G E O R A D G S W G **V** F H

S N S **C** I E A E W I L A M **V** K D D P K Y D K **V** V Q A I L N E Q R E D G S W A **V** Y Y

R W I A D Q Q N D D G G F G D T D

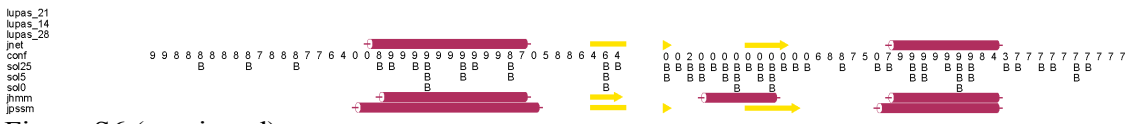

Figure S6 (continued).

UniRef90\_Q8W3Z4  
UniRef90\_Q39RT6  
UniRef90\_Q0AFY0  
UniRef90\_Q029U6  
UniRef90\_P84466  
UniRef90\_A0V5P5  
UniRef90\_Q9X7V9  
UniRef90\_Q32BH8  
UniRef90\_P52346  
UniRef90\_Q8DGK8  
UniRef90\_Q6VWA7  
UniRef90\_Q59060  
UniRef90\_Q59060  
UniRef90\_UPI000039D45A  
UniRef90\_UPI00006B70A6  
UniRef90\_Q2Y5X6  
UniRef90\_Q07143  
UniRef90\_Q07143  
UniRef90\_A1AN91  
UniRef90\_Q881NS  
UniRef90\_A9JND6  
UniRef90\_A0LUS0  
UniRef90\_P33990  
UniRef90\_Q7NE23  
UniRef90\_P73914  
UniRef90\_Q4CA42  
UniRef90\_A1D8P1  
UniRef90\_A1D8P1  
UniRef90\_P48449  
UniRef90\_Q2JJC4  
UniRef90\_A2RH34  
UniRef90\_Q74FC1  
UniRef90\_Q796C3  
UniRef90\_A1DR10  
UniRef90\_Q96WJ0  
UniRef90\_Q347M9  
UniRef90\_Q62TY2  
UniRef90\_Q10Z31  
UniRef90\_A09GV5  
UniRef90\_P54924  
UniRef90\_A0KCC1  
UniRef90\_Q6H3F4  
UniRef90\_A0LVK9  
UniRef90\_Q35C98  
UniRef90\_Q118B5  
UniRef90\_Q2E5Y5  
UniRef90\_Q7UP25  
UniRef90\_Q68446  
UniRef90\_A1DRH9  
UniRef90\_A1HVC3  
UniRef90\_A1CPZ2  
UniRef90\_Q4WDM6  
UniRef90\_Q2ET5  
UniRef90\_A1DRH6  
UniRef90\_Q57ZG6  
UniRef90\_A1DRH2  
UniRef90\_UPI0000699273  
UniRef90\_Q283H0  
UniRef90\_A1D8P8

90 100 110 120

K A P N G D [ ] N T T [ ] E Y A A [ ] R A S G [ ] A P E S A P [ ] S S A R E

D A P A G D [ ] N A T [ ] E A Y A A [ ] R T A G F G A G D E R [ ] H G G [ ] K F T R Y

R S H S N [ ] A T S Y [ ] V [ ] A A W T [ ] S D Q [ ] T C E T T D A N A [ ] R R N

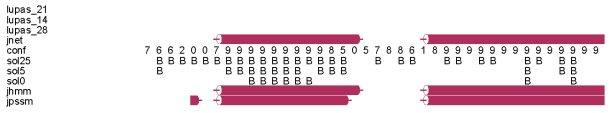



130 140 150 160

P E Q E R H

W L A P W E G T P T P P E L I F P R M A S W A R S T L V P L S L S A R R P

W L A P W D E T P A L A P E I L L P A W C P L A R A T L V P L S V L S V R P V

W L Q L A G E L D G L R D K T F V V P I L T N M A L G L V P W K K V S A L P F

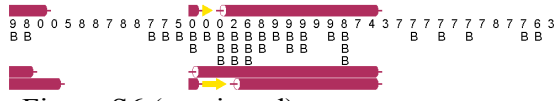

Figure S6 (continued).

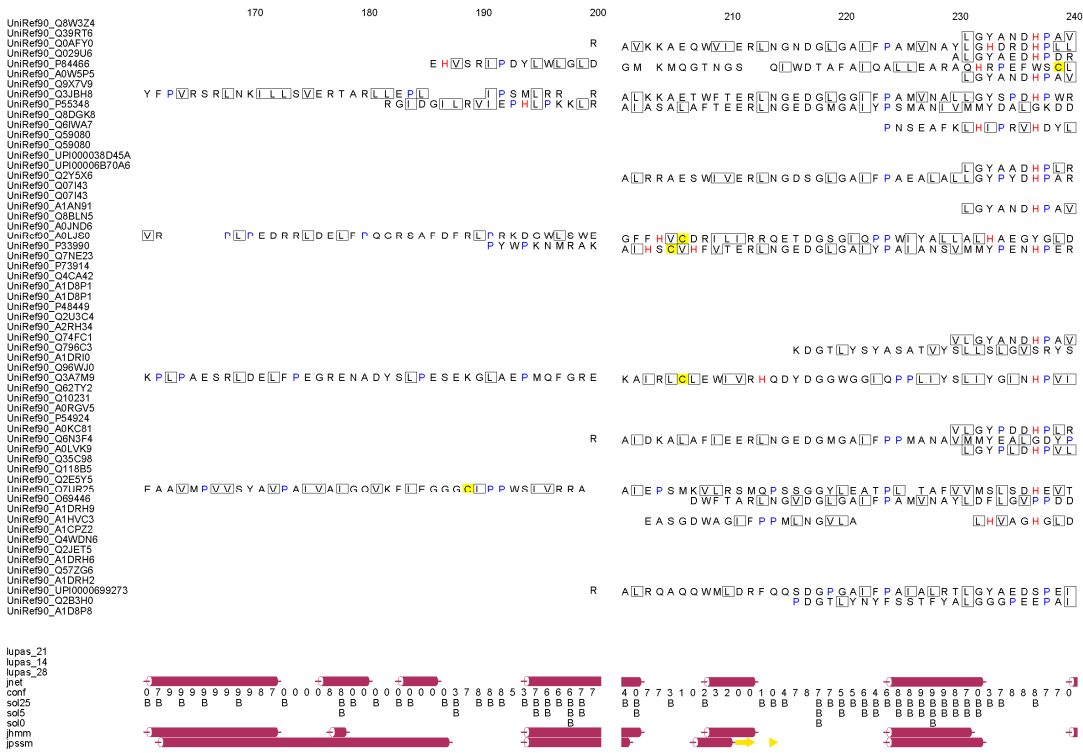

Figure S6 (continued).

```

UniRef90_Q8W3Z4
UniRef90_Q39T6
UniRef90_Q0AFY0
UniRef90_Q029Y6
UniRef90_P84466
UniRef90_A0W5P5
UniRef90_Q8X7V9
UniRef90_Q3JBH6
UniRef90_P55348
UniRef90_Q8DC89
UniRef90_Q8W47
UniRef90_Q59080
UniRef90_Q59080
UniRef90_UP1000038D45A
UniRef90_UP100008870A6
UniRef90_Q2Y5X6
UniRef90_Q07143
UniRef90_Q07143
UniRef90_A1AN91
UniRef90_Q8BLN5
UniRef90_A0JND6
UniRef90_A0LJ50
UniRef90_P33990
UniRef90_Q7NE23
UniRef90_P73914
UniRef90_Q4CA42
UniRef90_A1D8P1
UniRef90_A1D8P1
UniRef90_P48449
UniRef90_Q2J0C4
UniRef90_Q2RH34
UniRef90_Q74FC1
UniRef90_Q796C3
UniRef90_A1DR10
UniRef90_Q96WJ0
UniRef90_Q3A7M9
UniRef90_Q82T72
UniRef90_Q10231
UniRef90_A0RGV5
UniRef90_P54924
UniRef90_A0KC81
UniRef90_Q8N3F4
UniRef90_A0L1V9
UniRef90_Q35C98
UniRef90_Q118B5
UniRef90_Q2E5Y5
UniRef90_Q7UR25
UniRef90_Q89446
UniRef90_A1DRH9
UniRef90_A1HYC3
UniRef90_A1CP22
UniRef90_Q4WDN6
UniRef90_Q2JET5
UniRef90_A1DRH6
UniRef90_Q57ZG6
UniRef90_A1DRH2
UniRef90_UP10000699273
UniRef90_Q2B3H0
UniRef90_A1D8P8

```

250 260 270 280 290 300 310 320

A K G I Q A L N F C I E S D D E L V S C I T S P V W D T A T L A L M A M V D S E  
Q O O R Q S L R E L L V D E G E O P C V S P V W D T V L A T L L A L Q E A G  
S E A L I R H F E S L L L E T D D F O P C V S P V W D T A L C A F A L Q E A G  
R K A H E Y I R I S Q I V P D R F P Q K Y Y R H M E S F S T L D G W  
A K G L E A L N F T I E D S D S L V S C I T S P V W D T A L V L L Q A M O E A S  
V I Q A K K A L Q N L V K N S A S O P C L S P V W D T L A T T I A L A D A G G  
A I A R R A L D K L L V T I G E E O P C L S P V W D T A L T C H A L L Q E I V G  
W V A E D G M K M Q G Y N G S G V I Q P C V S P V W D T A L V M R A M V D S G  
L W D T A F A V I Q A L T A T G

Q O V R K G L R D L V R A Y V O P C V S P V W D T A V M R A L V I E S S  
E O R K A L R L L L V E E G E O P C V S P V W D T V L T C L A F E D T E

A K G L D A L A N F C I E D D D C I T S C V S P V W D T A L A L V A L Q E A D  
L R I L S

H P I R A G L R A F D S H W S Q A S E S P V W D T L S I R A L A D G  
A I A R R A V E K L M D K E V I Y O P C L S P V W D T A L T M R A L V D S G  
Q A C V S P V W D T A W V V R A L A E A D  
Q A C V S P V W D T A W V V R A L T D S G  
P T A W R S D P F A L T L S I L H R L D  
P T A W R S D P F A L L F T L S I L H R L D

K G K R V O P C V S P V W D T T L M S I A L S D A A  
S T V W D T A L L N Y A L M K S G

A K G I Q A L N F C I E G E D E L V S C I T S P V W D T A L L G Y A L Q E A N  
P R A L T G L R S L V T K C N G L P Y L S T V W D T A L I S Y A L Q K N G

S K G L D A F N P A Y E K N G G V Y L Q O S E S P V W D T S L V I V A M O E A G  
S T V W D T A L L S Y A M O E S G  
V W E T S F T L Q A L V I E S S  
V W D T A L L S Y A L Q E A D  
V W D T T L T A H A L L E A G  
V W D T A L A S H A V L E A D  
V W D T A L A V T A L R D A G

E A D R F A I E N E D S Y Q A C V S P V W D T A V W T R S L V D S G  
S P S T V W D T A L L S Y A L Q E A N  
Q N G R F R L D S M L P D G W P I D T N I A N W A T S I A I T A  
E R A R E S L D R L L V F Q G O P C V S P V W D T A L L S I T L L Q E A G

A G L E A E R F A V S D R E G F R I E A Q S P V W D T T L A L T G L L D S G  
C I T S P V W D T L L M L R A L O D A S

S P V W D T A L A V V I L S D A G  
S P V W D T P W M L E A L L E T G

Q Y C L D H L E R L V L E D G E L O P C K S P V W D T S I T L R A L Q E A G  
R N A V A G L R M T V K A D G R T I Q Y T A V W N T A L T S H A L A E A G  
T T L R D S S R M L T G L E D A G

V L I E D O P G D L N F W Y R H I T S K G P F F S T A D H G W P I L S D C T A E G L L K  
W P T D P A L V K A Q W L L S R E G F F Q N D W Y P D V D D S G I V M M  
O D S E P I R R A L D W I T O I L D E P F F S N H Y P D O Y A N H Y P D I D D T A A V I A W  
N T D D R T L A A D W L I S D W S I K R F E F A N E F Y P D I D D T A M V L L  
V I A D P A E A L K S I L L L Q E A F F E F C N D W Y P D V D D S T V V M I  
V I L D H P S I L K A S O W L D R A F F E F C N D W Y P D V D D S T V V M I  
V P E D H P O L V K A S D W D W S V K R F E F H N D Y P D I D D T A E V V L  
G G H T A P V I G D W O V O H P N L K G G W A N S Y P D I D D T A A V I A W  
N A W A K A K G S D W L R G W L D V K G F O Y N N A H Y P D I D D T A A V V M  
V I A P D L S K Q L L D Y G D W H I K N K K F E F E N R F Y P D I D D T A A V V M  
L V L D O P G D L S Y W Y R H I S K G P F S T A D H G W P I L S D C T A E G L L K  
E K A L E W I L A H O E A D G G W G P W F Y A L L A L K  
E K A L E W I L A H O E A D G G W G P W F Y A L L A L K  
S S A Q V R H A L D W L Q A D W S E H F O F R N D H Y P D I D D T A A V I A W  
V I D Q K P I R K A L D W L V A D W O E D H F O Y A N H Y P D I D D T A A V I A W  
I D H V L Q W I I R H O D Y D G S W G G F W I Y G L M  
V P A D E V R R K G D W O V K C P E L E G G G W A N D W Y P D V D D S G F V M I  
O V R P E P W S R K A E Y L R I S Q V P D N F P D X O K Y Y R H M K  
E E R K S I A S A L E W L N D W A V R A F O R A N S F Y P D I D D T A V I A L  
G D E A E K S A I G D W A W R R D L R P G G W A N D Y P D V D D T A V I T M  
L P P D L K Q L L D Y G W A V K R R A F E F N R F Y P D I D D T A V V M  
L S K D H F A L Y K A T Y G D W O L K R F E F N D W Y P D I D D T A V V M  
L E K K O V M E Y G D W A V K N K A G K P G G W A N R F Y P D I D D S A T V V M  
G L R S F N K G V I D W L E H Q E D M G D I G D I M P L H G A M L  
G L R S F N K G V I D W L E H Q E D M G D I G D I M P L H G A M L  
Q V P D N P D Y O K Y Y R O M R K G S F S D G W I V S D C T A E A L L K  
T R N O I P R G D W R V Y R R L A P G G F F E N S Y P D I D D S A A I L  
I S D N O I T S A A R F L E R Q K K G F N I N N P D O D D T A V L L K  
V D H P S L S K A A Q W L D R E V R P F F M N D W Y P D V D D S G I V M M  
V I T E T D V T K A A D F L L A D W S V K G F N I N N P D O D D T A V L L K  
N P V I D P A L V K A Q W L L D R E A F F L N D W Y P D V D D S G F V M I  
L D P E K K A L D F L D K O I L O K N F S T R O O G Y T V S D C T A E A L L K  
S F D O T P P A L D W I L S D W G V K A F E R A N T A Y P D V K D S A A V D A  
V P E S S T S A A D Y L L K R Q H K G F N I N N P D I D D T A A A L K  
L Y E K F K D I A K A L Y N S L G A W P F N I T O G Y T V S D T S E A L R  
V S K D N I Q N A T A Y L L K Q H T K K G F S D V N T P D I D D T A V L R  
I P K Q E L E V K G D W A V K R P D V R P G G W A N A Y Y P D I D D T A V V M  
V A A P E T G D T A S G A L R D L D K R A F O Y A N Y P D I D D T A V I A R  
G G A K V R P A L D W L R Q V L D L K G F O Y N N A H Y P D I D D T A V V M  
L P A O H P R V Q A A R W L V S E A F E F A N D Y P D I D D T A E V V L  
V I E W M I R H O D P D G A W G P W I Y G L M  
I S P S O I L D Y G D W V F K N K F G K P G G W A N R F Y P D I D D T A V V M  
N E S T L O T A E Y I L Q R H E K G F S D V N T T P D I D D T A V I N W  
U T M D P D D S G Y Q E R H T G A D P G S W G T S V D S O D T E G A I L  
V A R H T A D L R I D A A L S D W R E G G W F G N D Y P D V D D S G I V A H  
V P T D X I S K Q I L T G V H G D W A V K N F E F E N D Y P D I D D T A E V V L  
E S T D P R L V A A R R W E G M F E Y A N S W Y P D I D D T A A V I V I  
L G I K S D P R L A D A A W D W R Y I Q F E Y S N T W Y P D I D D T A A V L  
V P A D H P A M V R A G R W L V D E E A F E Y N T W Y P D I D D T A A V L  
V P P G D P A K Q I L T G V R G D W S P K G F E F E N D Y P D I D D T Q V L T  
P A N D P X I L L T E V R G D W A V K N F E F E N D Y P D I D D T A E V L R  
L G L A E P T O V E W L S D W T N N V F E Y A N E F Y P D I D D T S M G I M  
V P P K E H R R F G D W I V H N T K A E P G G W G N T I N P D I D D T A A L R  
L D A P W F R K S O W L O R C L L P D V I N N D A S K T F E V I D D M A S A L H

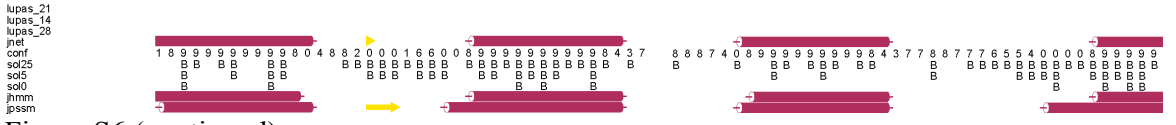

Figure S6 (continued).

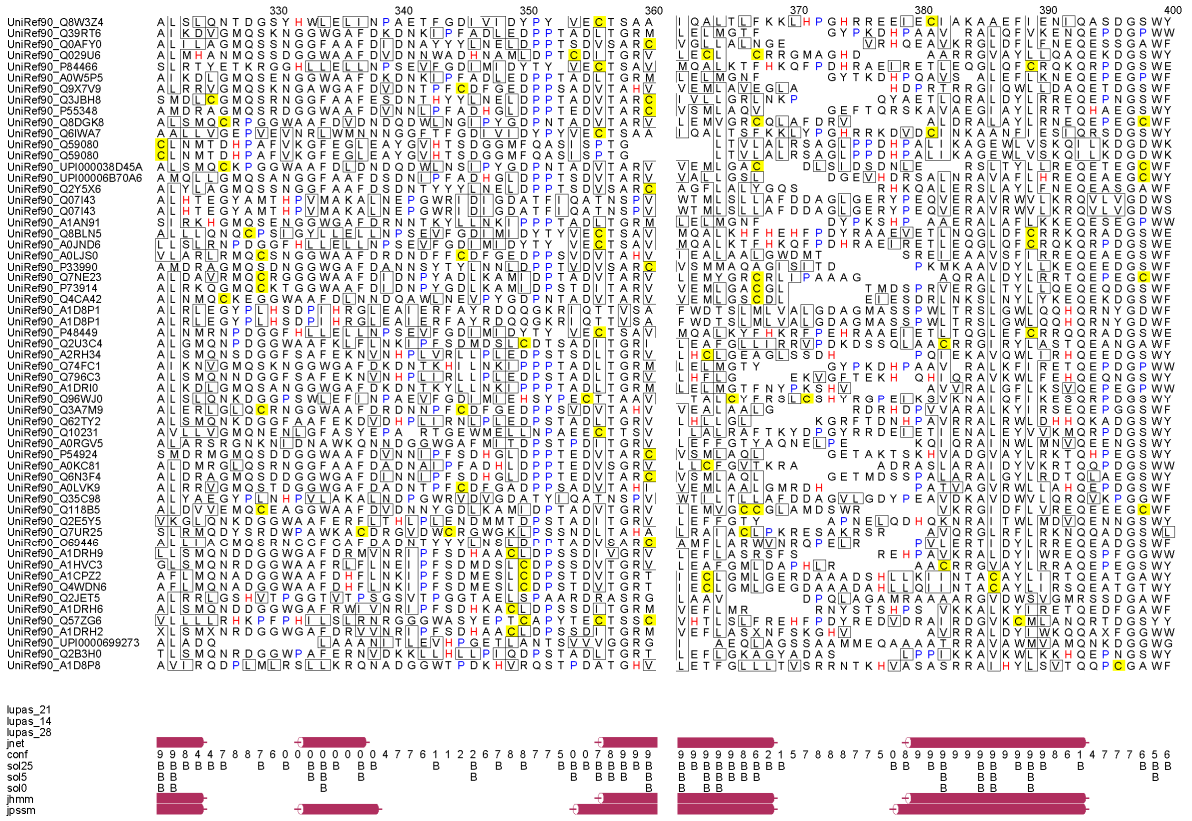

Figure S6 (continued).





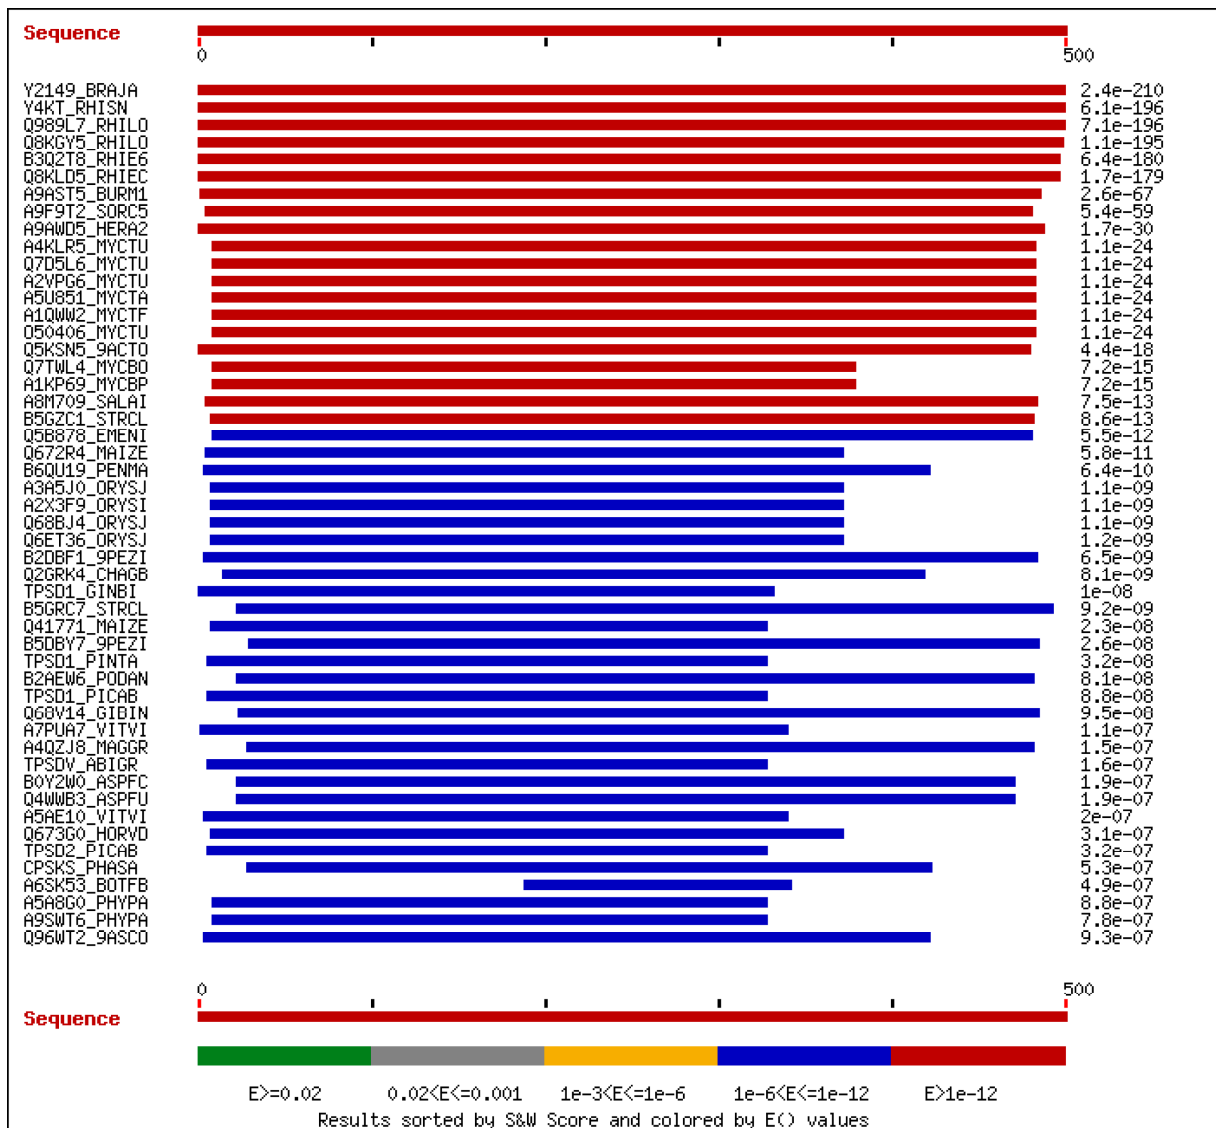

Figure S7: FASTA<sup>6</sup> search program output alignment by using *Bradyrhizobium japonicum*  $\gamma$ -domain only as the query. Note the high similarity to *M. tuberculosis* Rv3377c, rice and maize CPS.

### Supporting Experimental Section:

**Synthetic Aspects.** All reagents used for synthesis were purchased from Aldrich (Milwaukee, WI). The purities of all compounds were routinely monitored by using  $^1\text{H}$  and  $^{31}\text{P}$  NMR spectroscopy at 400 or 500 MHz on Varian (Palo Alto, CA) Unity spectrometers using, in some instances, absolute spin-count quantitative analyses. **BPH-882** was purchased from Biomol international (Plymouth Meeting, PA); **BPH-863** was purchased from EMD Biosciences, Inc. (San Diego, CA). **BPH-891**, **BPH-854** were purchased from Sigma-Aldrich. The syntheses of **BPH-892**, **BPH-904**, **BPH-852**, **BPH-911**, **BPH-902** were reported previously<sup>7-10</sup>. **BPH-895** was a gift from Dr. L.L. Gundersen. **BPH-850** was prepared using the procedure reported<sup>11-13</sup>. **BPH-261 (Minodronate)**, **BPH-661**, **BPH-673** were available from our previous work<sup>12, 13</sup>.

**General procedure for BPH-554 and BPH-557.** An amine (3 mmol), triethyl orthoformate (3.6 mmol), and diethyl phosphite (12 mmol) were heated to 140 °C under  $\text{N}_2$  overnight. The mixture was subjected to column chromatography to give the tetraethyl ester, which was then treated with  $\text{TMSBr}$  (8 equiv) in acetonitrile for 8 h at room temperature. Upon removal of the solvent, the residue was dissolved in ethanol or acetone to precipitate the substituted aminomethylene bisphosphonate.

**{[4-(2-Diethylamino-ethylcarbamoyl)-phenylamino]-phosphono-methyl}-phosphonic acid. (BPH-557).**

Anal. ( $\text{C}_{14}\text{H}_{27}\text{N}_3\text{Na}_2\text{O}_9\text{P}_2$ ) C, H, N.  $^1\text{H}$  NMR (400 MHz,  $\text{D}_2\text{O}$ ):  $\delta$  7.62 (d, 2H,  $J = 8.0\text{Hz}$ ), 6.60 (d, 2H,  $J = 8.0\text{Hz}$ ), 4.15-4.38 (m, 2H), 3.70 (t, 1H,  $J = 22\text{Hz}$ ), 3.25-3.38 (m, 2H), 3.13 (t, 4H,  $J = 7.2\text{Hz}$ ), 1.11 (t, 4H,  $J = 7.2\text{Hz}$ ).  $^{31}\text{P}$  NMR (162 MHz,  $\text{D}_2\text{O}$ ):  $\delta$  16.1.



**4-[(Bis-phosphono-methyl)-amino]-benzoic acid 2-diethylamino-ethyl ester. (BPH-554).**

Anal. (C<sub>14</sub>H<sub>27</sub>N<sub>3</sub>Na<sub>2</sub>O<sub>9</sub>P<sub>2</sub>) C, H, N. <sup>1</sup>H NMR (400 MHz, D<sub>2</sub>O): δ 7.47 (d, 2H, *J* = 8.0Hz), 6.64 (d, 2H, *J* = 8.0Hz), 3.89 (t, 1H, *J* = 21Hz), 3.45-3.60 (m, 2H), 3.00-3.19 (m, 4H), 1.15(t, 4H, *J* = 7.2Hz). <sup>31</sup>P NMR (162 MHz, D<sub>2</sub>O): δ 16.4.

**BPH-876** was prepared by refluxing of 3, 4-dichlorobenzyl chloride (1 mmol) and tributyl phosphine (1 mmol) in acetone (5 mL). Removal of solvent gave BPH-876 as a white solid. Yield 89%. Anal. (C<sub>19</sub>H<sub>32</sub>Cl<sub>3</sub>P) C, H. <sup>1</sup>H NMR (400 MHz, CDCl<sub>3</sub>): δ 8.22 (d, 1H, *J* = 8.4Hz), 7.43 (s, 1H), 7.33 (d, 1H, *J* = 8.4 Hz), 4.56 (d, 2H, *J* = 12 Hz), 2.44-2.53 (m, 6H), 1.38-1.42 (m, 12H), 0.94 (t, 3H, *J* = 6.8 Hz).

**BPH-916, BPH-922, BPH-901, BPH-899, BPH-905, BPH-904, BPH-913, BPH-918, BPH-919, BPH-920** were prepared using a similar procedure to that previously reported, using alkylbromides and methylallylamine as reactants<sup>14</sup>.

**16-(N-allyl-N-methylamino)hexadecanoic acid•hydrobromide (BPH-916).**

Anal. (C<sub>21</sub>H<sub>42</sub>BrNO<sub>2</sub>) C, H, N. <sup>1</sup>H NMR (400 MHz, CDCl<sub>3</sub>): δ 6.12-6.21 (m, 1H), 5.50-5.60 (m, 2H), 3.6-3.75 (m, 2H), 2.90-3.05 (m, 2H), 2.73 (s, 3H), 2.35 (t, 2H, *J* = 7.2 Hz), 1.80-1.98 (m, 2H), 1.61-1.69 (m, 2H), 1.20-1.40 (m, 22 H).

**Methyl 16-(N-allyl-N-methylamino)hexadecanoate•hydrobromide (BPH-922).**

Anal. (C<sub>21</sub>H<sub>41</sub>NO<sub>2</sub>Br•0.3H<sub>2</sub>O) C, H, N. <sup>1</sup>H NMR (400 MHz, CDCl<sub>3</sub>): δ 11.5 (s, 1H), 6.14-6.19 (m, 1H), 5.51-5.60 (m, 4H), 3.66 (s, 3H), 3.55-3.70 (m, 3H), 2.81-3.09 (m, 2H), 2.30 (s, 3H), 2.30 (t, 2H, *J* = 6.5Hz), 1.79-2.00 (m, 2H), 1.59 (t, 2H, *J* = 6.5Hz), 1.24-1.32 (m, 24H).

**(4-(4-(N-allyl-N-methylamino)butoxy)phenyl)(phenyl)methanone•hydrobromide (BPH-901).**

Anal. (C<sub>21</sub>H<sub>26</sub>BrNO). C, H, N. <sup>1</sup>H NMR (400 MHz, CDCl<sub>3</sub>): δ 7.85 (d, 2H, *J* = 8 Hz), 7.69 (d, 2H, *J* = 7.2Hz), 7.47 (t, 1H, *J* = 7.2Hz), 7.45 (t, 3H, *J* = 7.2Hz), 6.10-6.21 (m, 2H), 5.52-5.64 (m, 2H), 3.90 (t, 2H, *J* = 6.4 Hz), 3.60-3.67 (m, 2H), 2.80-3.18 (m, 2H), 2.77 (s, 3H), 1.68-2.00 (m, 4H).

**(4-(8-(N-allyl-N-methylamino)octyloxy)phenyl)(phenyl)methanone (BPH-899).**

Anal. (C<sub>25</sub>H<sub>34</sub>BrNO•0.3H<sub>2</sub>O) C, H, N. <sup>1</sup>H NMR (400 MHz, CDCl<sub>3</sub>): δ 7.83 (d, 2H, *J* = 8.8Hz), 7.74 (d, 2H, *J* = 7.2Hz), 7.57 (t, 1H, *J* = 7.2Hz), 7.46 (t, 3H, *J* = 7.2Hz), 6.14-6.21 (m, 2H), 5.51-5.61 (m, 2H), 3.62-3.68 (m, 2H), 2.80-3.18 (m, 2H), 2.73 (s, 3H), 1.78-2.00 (m, 4H), 1.32-1.49 (m, 8H).

**(4-(3-(methylallylamino)propoxy)phenyl)(phenyl)methanone•hydrobromide (BPH-905).**

Anal. (C<sub>20</sub>H<sub>24</sub>BrNO<sub>2</sub>) C, H, N. <sup>1</sup>H NMR (400 MHz, CDCl<sub>3</sub>): δ 11.8 (s, 1H), 8.04 (d, 2H, *J* = 9.0 Hz), 7.7 (d, 2H, *J* = 9.0Hz), 7.59 (t, 1H, *J* = 7.5Hz), 7.56 (t, 2H, *J* = 7.5Hz), 6.92 (t, 2H, *J* = 9.0Hz), 6.19-6.23 (m, 1H), 5.56-5.65 (m, 2H), 4.18 (t, 3H, *J* = 4.8 Hz), 3.60-3.82 (m, 2H), 3.10-3.42 (m, 2H), 2.81 (s, 3H), 2.4-2.60 (m, 2H).

**(E)-N-allyl-5-((4aR,5R)-decahydro-1,1,4a-trimethylnaphthalen-5-yl)-N,3-dimethylpent-2-**

**en-1-amine•hydrobromide (BPH-904).** Anal. (C<sub>24</sub>H<sub>44</sub>BrNO) C, H, N. <sup>1</sup>H NMR (400 MHz, CDCl<sub>3</sub>): δ 6.12-6.20 (m, 1H), 5.42-5.80 (m, 4H), 3.4-3.75 (m, 4H), 2.65 (s, 3H), 0.6-2.4

**6-(m-tolyloxy)-N-allyl-N-methylhexan-1-amine (BPH-913).** Anal. (C<sub>17</sub>H<sub>27</sub>NO) C, H, N. <sup>1</sup>H NMR (400 MHz, CDCl<sub>3</sub>): δ 7.18 (t, 2H, *J* = Hz), 6.82-6.87 (m, 3H), 5.8-6.0 (m, 1H), 5.11-5.21 (m, 2H), 3.96 (t, 2H, *J* = 6.8Hz), 3.00 (d, 2H, *J* = 6.4Hz), 2.31-2.35 (m, 5H), 2.21 (s, 3H), 1.76-1.80 (m, 2H), 1.39-4.58 (m, 6H).

**10-(N-allyl-N-methylamino)decanoic acid•hydrobromide (BPH-918).** Anal. (C<sub>14</sub>H<sub>28</sub>BrNO<sub>2</sub>)

C, H, N. <sup>1</sup>H NMR (400 MHz, CDCl<sub>3</sub>): δ 6.12-6.20 (m, 1H), 5.52-5.60 (m, 2H), 3.6-3.75 (m, 2H),

2.90-3.05 (m, 2H), 2.75 (s, 3H), 2.35 (t, 2H,  $J = 7.2$  Hz), 1.80-1.98 (m, 2H), 1.61-1.69 (m, 2H), 1.20-1.40 (m, 10H).

**N1, N6-diallyl-N1,N6-dimethylhexane-1,6-diamine•Hydrobromide (BPH-919).**

Anal.(C<sub>14</sub>H<sub>30</sub>Br<sub>2</sub>N<sub>2</sub>) C, H, N. <sup>1</sup>H NMR (400 MHz, CDCl<sub>3</sub>):  $\delta$  10.81 (s, 2H), 6.08-6.17 (m, 2H), 5.54-5.59 (m, 4H), 3.43-3.78 (m, 4H), 3.16-3.18 (m, 4H), 3.02-3.04 (m, 4H), 2.7 (s, 6H), 1.87-1.98 (m, 2H), 1.50-1.53 (m, 4H).

**N1, N8-diallyl-N1, N8-dimethyloctane-1, 8-diamine•hydrobromide (1:2) (BPH-920).**

Anal.(C<sub>16</sub>H<sub>34</sub>Br<sub>2</sub>N<sub>2</sub>) C, H, N. <sup>1</sup>H NMR (400 MHz, CDCl<sub>3</sub>):  $\delta$  10.96 (s, 2H), 6.09-6.18 (m, 2H), 5.53-5.70 (m, 4H), 3.45-3.79 (m, 4H), 3.16-3.18 (m, 4H), 3.02-3.04 (m, 4H), 2.7 (s, 6H), 1.83-1.98 (m, 2H), 1.34-1.53 (m, 8H).

**BPH-890, BPH-921, BPH-917, BPH-907, BPH-909, BPH-908, BPH-924, BPH-896, BPH-923** were prepared by refluxing different alkyl bromides in pyridine followed by removal of solvent and recrystallization from acetone.

**[(4-phenylcarbonyl)-phenoxyoctyl]pyridinium bromide (BPH-890).** Anal. (C<sub>26</sub>H<sub>30</sub>BrNO<sub>2</sub>) C, H, N. <sup>1</sup>H NMR (400 MHz, CDCl<sub>3</sub>):  $\delta$  9.54 (d, 2H,  $J = 5.6$  Hz), 8.50 (t, 1H,  $J = 8$  Hz), 8.10 (t, 2H,  $J = 6.8$  Hz), 7.80 (d, 2H,  $J = 6.8$ Hz), 7.60 (d, 2H,  $J = 6.8$ Hz), 7.55 (t, 1H,  $J = 7.6$ Hz), 7.50 (t, 2H,  $J = 7.6$  Hz), 6.95 (d, 2H,  $J = 8$  Hz), 5.05 (t, 2H,  $J = 7.6$  Hz), 4.02 (t, 2H,  $J = 6.4$  Hz), 2.04-2.08 (m, 2H), 1.74-1.82 (m, 2H), 1.36-1.46 (m, 8H).

**[6-(4-(formylphenyl)(phenoxy))hexyl]pyridinium bromide (BPH-921).** Anal. (C<sub>24</sub>H<sub>26</sub>BrNO<sub>2</sub>) C, H, N. <sup>1</sup>H NMR (400 MHz, CDCl<sub>3</sub>):  $\delta$  9.60 (d, 2H,  $J = 5.6$  Hz), 8.46 (t, 1H,  $J = 7.6$ Hz), 8.07 (t, 2H,  $J = 7.2$ Hz), 7.64-7.17 (m, 4H), 7.50 (t, 1H,  $J = 7.8$ Hz), 7.42 (t, 2H,  $J = 7.8$ Hz), 6.90 (t, 2H,  $J = 8.8$ Hz), 5.00 (t, 2H,  $J = 7.2$  Hz), 3.95 (t, 2H,  $J = 6.0$  Hz), 2.00- 2.07 (m, 2H), 1.73-1.78 (m, 2H), 1.43-1.47 (m, 4H).

**[1-carbamoylhexadecanyl]pyridinium chloride (BPH-917).** Anal. ( $C_{21}H_{36}ClNO_2 \bullet 0.3H_2O$ ) C, H, N.  $^1H$  NMR (400 MHz,  $CD_3OD$ ):  $\delta$  9.56 (d, 2H,  $J = 5.6$  Hz), 8.42 (t, 1H,  $J = 7.6$  Hz), 8.01 (t, 2H,  $J = 6.8$  Hz), 4.9 (t, 2H,  $J = 7.6$  Hz), 2.60 (t, 2H,  $J = 7.2$  Hz), 2.2-2.4 (m, 2H), 1.30-2.4 (m, 24H).

**[6-(4-(methoxycarbonyl)-3-hydroxyphenoxy)hexyl]-pyridinium bromide (BPH-907).** Anal. ( $C_{19}H_{24}BrNO_4 \bullet 1.4H_2O$ ) C, H, N.  $^1H$  NMR (400 MHz,  $D_2O$ ):  $\delta$  8.74 (d, 2H,  $J = 6$  Hz), 8.35 (t, 1H,  $J = 7$  Hz), 7.82 (t, 2H,  $J = 7$  Hz), 7.54 (d, 1H,  $J = 9$  Hz), 6.23 (d, 1H,  $J = 9$  Hz), 6.20 (s, 1H), 4.31 (t, 2H,  $J = 7.5$  Hz), 3.80 (t, 2H,  $J = 6$  Hz), 3.70 (s, 3H), 1.82-1.85 (m, 2H), 1.50-1.80 (m, 2H), 1.29-1.51 (m, 4H).

**[8-(4-carbonyl)phenoxy]octyl] pyridinium bromide (BPH-909).** Anal. ( $C_{20}H_{26}BrNO_3$ ) C, H, N.  $^1H$  NMR (400 MHz,  $D_2O$ ):  $\delta$  8.63 (d, 2H,  $J = 5.5$  Hz), 8.33 (t, 1H,  $J = 8$  Hz), 7.82 (t, 2H,  $J = 6.5$  Hz), 7.78 (d, 1H,  $J = 9$  Hz), 6.84 (d, 1H,  $J = 8.5$  Hz), 4.37 (t, 2H,  $J = 7.5$  Hz), 3.92 (t, 2H,  $J = 6.5$  Hz), 1.75-1.82 (m, 2H), 1.55-1.80 (m, 2H), 1.29-1.51 (m, 8H).

**1-[8-(4-(methoxycarbonyl)phenoxy)octyl]-pyridinium bromide (BPH-908).** Anal. ( $C_{21}H_{28}BrNO_3 \bullet H_2O$ ) C, H, N.  $^1H$  NMR (400 MHz,  $D_2O$ ):  $\delta$  8.66 (d, 2H,  $J = 5.5$  Hz), 8.33 (t, 1H,  $J = 8$  Hz), 7.86 (t, 2H,  $J = 6.5$  Hz), 7.52 (d, 1H,  $J = 8.5$  Hz), 6.52 (d, 1H,  $J = 8.5$  Hz), 4.37 (t, 2H,  $J = 7.5$  Hz), 3.66 (s, 3H), 3.51 (t, 2H,  $J = 6.5$  Hz), 1.71-1.75 (m, 2H), 1.30-1.55 (m, 2H), 0.98-1.20 (m, 8H).

**[6-(4-(phenylcarbonyl)(phenoxy))propyl]pyridinium bromide (BPH-924).**

Anal. ( $C_{21}H_{20}NO_2Br$ ) C, H, N.  $^1H$  NMR (400 MHz,  $CDCl_3$ ):  $\delta$  9.62 (d, 2H,  $J = 6$  Hz), 8.48 (t, 1H,  $J = 8.0$  Hz), 8.04 (t, 2H,  $J = 8.0$  Hz), 7.60-7.63 (m, 4H), 7.48 (t, 1H,  $J = 7.5$  Hz), 7.36 (t, 2H,  $J = 7.5$  Hz), 6.73 (d, 2H,  $J = 7.5$  Hz), 5.27 (t, 2H,  $J = 7.0$  Hz), 4.23 (t, 2H,  $J = 5.5$  Hz), 2.57-2.62 (m, 2H).

**[6-(4-(carboxy)-3-hydroxyphenoxy)hexyl]-pyridinium chloride (BPH-923A).** Anal. ( $C_{18}H_{22}ClNO_4$ ) C, H, N.  $^1H$  NMR (400 MHz,  $D_2O$ ):  $\delta$  8.64 (d, 2H,  $J = 6$ Hz), 8.32 (t, 1H,  $J = 8$  Hz), 7.82 (t, 2H,  $J = 7$ Hz), 7.50 (d, 1H,  $J = 9$ Hz), 6.26(d, 1H,  $J = 9$ Hz), 6.18 (s, 1H), 4.41 (t, 2H,  $J = 7.5$ Hz), 3.80 (t, 2H,  $J = 6$ Hz), 1.80-1.84 (m, 2H), 1.49-1.80 (m, 2H), 1.19-1.51 (m, 4H).

**General procedure for BPH-888 and BPH-914.** To a solution of malonic acid, monoethyl ester (1 mmol) were added N-ethyl-N-(3-dimethylaminopropyl)-carbodiimide (EDC) (1.5 mmol) and 1-hydroxybenzotriazole (1 mmol). After stirring for 2h at room temperature, 50 mL of ethyl acetate was added and the reaction mixture washed successively with 1N HCl (5 mL), water (5 mL) and saturated  $NaHCO_3$  (5 mL), dried, and evaporated. The amide was purified using flash chromatography.

**N-[3-(3-Phenoxy-phenyl)-propyl]-melonic acid monoamide (BPH-888).** 3-(3-phenoxy-phenyl)-propylamine was coupled with monoethyl ester of malonic acid to give the ethyl ester of BPH-888, which was then hydrolyzed with 3 equiv. of KOH in MeOH/ $H_2O$  for 1h. The reaction mixture was acidified, extracted with ethyl acetate, and the organic layer evaporated. The oily residue was dissolved in methanol, neutralized with KOH and evaporated to give **BPH-888** as a white powder (250 mg, 66% overall yield). Anal. ( $C_{18}H_{18}KNO_4 \cdot 0.5H_2O \cdot 0.25KCl$ ) C, H, N.  $^1H$  NMR (400 MHz,  $D_2O$ ):  $\delta$  6.70-7.40 (m, 9H), 3.33-3.40 (m, 2H), 3.32 (s, 2H), 2.62 (t, 2H,  $J = 7.6$  Hz), 1.80-1.90 (m, 2H).

**(4-(6-bromohexyloxy)phenylcarbamoyl)methylphosphonic acid (BPH-914).** 4-(6-bromohexyl)aniline was coupled with dibenzyl phosphonoacetic acid, according to the general method, to give the dibenzyl ester of **BPH-914**. The benzyl groups were removed by hydrogenation for 1hr, catalyzed with 5% Pd/C in methanol, followed by neutralization with NaOH to give **BPH-914** as a white powder (289 mg, 60%). Anal. ( $C_{14}H_{19}NaNO_5 \cdot 2.5H_2O$ ) C, H,

N. <sup>1</sup>H NMR (400 MHz, D<sub>2</sub>O): δ 7.22 (d, 2H, *J* = 9Hz), 3.90 (t, 3H, *J* = 7Hz), 3.45 (t, 3H, *J* = 7Hz), 2.51 (d, 2H, *J* = 18.5Hz), 1.56-1.62 (m, 4H), 1.28-1.32 (m, 4H).

### References:

1. Fuchs, P. F.; Alix, A. J., High accuracy prediction of beta-turns and their types using propensities and multiple alignments. *Proteins* **2005**, 59, (4), 828-39.
2. Krissinel, E.; Henrick, K., Secondary-structure matching (SSM), a new tool for fast protein structure alignment in three dimensions. *Acta Crystallogr D Biol Crystallogr* **2004**, 60, (Pt 12 Pt 1), 2256-68.
3. Shindyalov, I. N.; Bourne, P. E., Protein structure alignment by incremental combinatorial extension (CE) of the optimal path. *Protein Eng* **1998**, 11, (9), 739-747.
4. Cuff, J. A.; Clamp, M. E.; Siddiqui, A. S.; Finlay, M.; Barton, G. J., JPred: a consensus secondary structure prediction server. *Bioinformatics* **1998**, 14, (10), 892-893.
5. Vogel, B. S.; Wildung, M. R.; Vogel, G.; Croteau, R., Abietadiene synthase from grand fir (*Abies grandis*). cDNA isolation, characterization, and bacterial expression of a bifunctional diterpene cyclase involved in resin acid biosynthesis. *J Biol Chem* **1996**, 271, (38), 23262-8.
6. Pearson, W. R.; Lipman, D. J., Improved tools for biological sequence comparison. *Proc Natl Acad Sci U S A* **1988**, 85, (8), 2444-8.
7. Roy, A.; Roberts, F. G.; Wilderman, P. R.; Zhou, K.; Peters, R. J.; Coates, R. M., 16-Aza-ent-beyerane and 16-Aza-ent-trachylobane: potent mechanism-based inhibitors of recombinant ent-kaurene synthase from *Arabidopsis thaliana*. *J Am Chem Soc* **2007**, 129, (41), 12453-60.
8. Ravn, M. M.; Jin, Q.; Coates, R. M., Synthesis of allylic isoprenoid diphosphates by S<sub>N</sub>2 displacement of diethyl phosphate. *Eur. J. Org. Chem.* **2000**, 2000, (8), 1401-10.

9. Peters, R. J.; Ravn, M. M.; Coates, R. M.; Croteau, R. B., Bifunctional abietadiene synthase: free diffusive transfer of the (+)-copalyl diphosphate intermediate between two distinct active sites. *J Am Chem Soc* **2001**, 123, (37), 8974-8.
10. Prusic, S.; Xu, J.; Coates, R. M.; Peters, R. J., Probing the role of the DXDD motif in Class II diterpene cyclases. *Chembiochem* **2007**, 8, (8), 869-874.
11. Wiemer, A. J.; Yu, J. S.; Shull, L. W.; Barney, R. J.; Wasko, B. M.; Lamb, K. M.; Hohl, R. J.; Wiemer, D. F., Pivaloyloxymethyl-modified isoprenoid bisphosphonates display enhanced inhibition of cellular geranylgeranylation. *Bioorg Med Chem* **2008**, 16, (7), 3652-60.
12. Szabo, C. M.; Martin, M. B.; Oldfield, E., An investigation of bone resorption and *Dictyostelium discoideum* growth inhibition by bisphosphonate drugs. *J Med Chem* **2002**, 45, (14), 2894-903.
13. Liu, C. I.; Liu, G. Y.; Song, Y.; Yin, F.; Hensler, M. E.; Jeng, W. Y.; Nizet, V.; Wang, A. H.; Oldfield, E., A cholesterol biosynthesis inhibitor blocks *Staphylococcus aureus* virulence. *Science* **2008**, 319, (5868), 1391-1394.
14. Dehmlow, H.; Aebi, J. D.; Jolidon, S.; Ji, Y. H.; von der Mark, E. M.; Himber, J.; Morand, O. H., Synthesis and structure-activity studies of novel orally active non-terpenoid 2,3-oxidosqualene cyclase inhibitors. *J Med Chem* **2003**, 46, (15), 3354-70.
